# Supplementary material
Source: PubMed Central journal article supplement (PMC2956428)

## SUPPORTING INFORMATION

# Convergent Route to the Spirohexenolide Macrocyclic

*Brian D. Jones, James J. La Clair, Curtis E. Moore, Arnold L. Rheingold, Michael D. Burkart\**

University of California, San Diego, Department of Chemistry and Biochemistry,  
9500 Gilman Drive, La Jolla, CA 92093-0358, USA

E-mail: [mburkart@ucsd.edu](mailto:mburkart@ucsd.edu)

Synthetic studies were conducted by B.D.J., J.J.L., and M.D.B.

X-ray crystallography was performed by C.F.M. and A.L.R.

This file contains copies of selected NMR spectra on intermediate described within this manuscript.  
An additional file containing detailed experimental procedures has been provided and can be downloaded  
online at <http://pubs.acs.org>

$^1\text{H-NMR}$  (400 MHz) and  $^{13}\text{C-NMR}$  (100 MHz) spectra of benzoate **9** in  $\text{CDCl}_3$

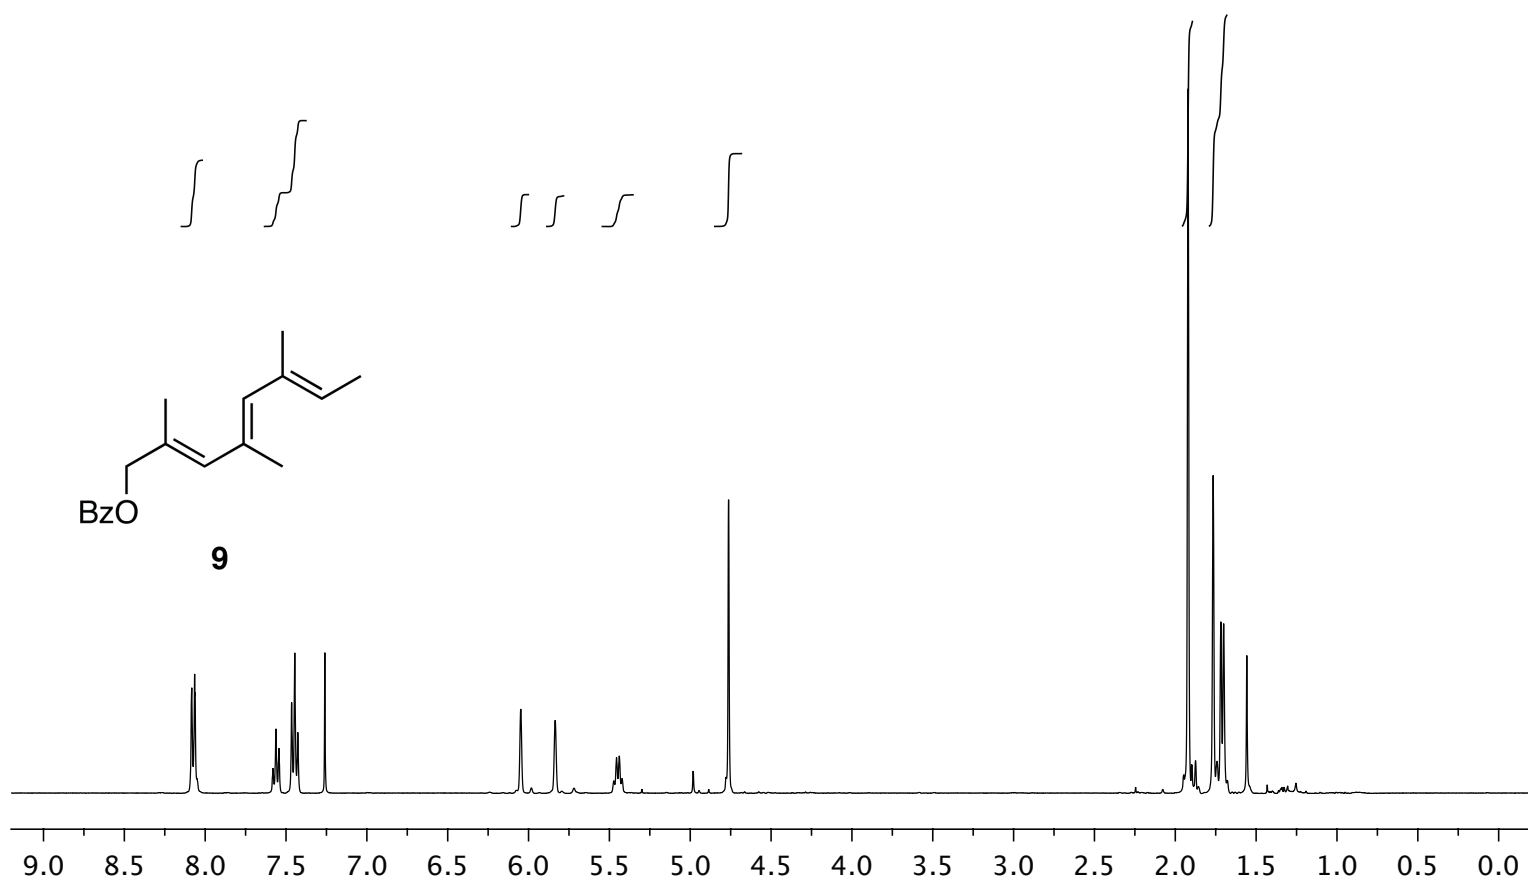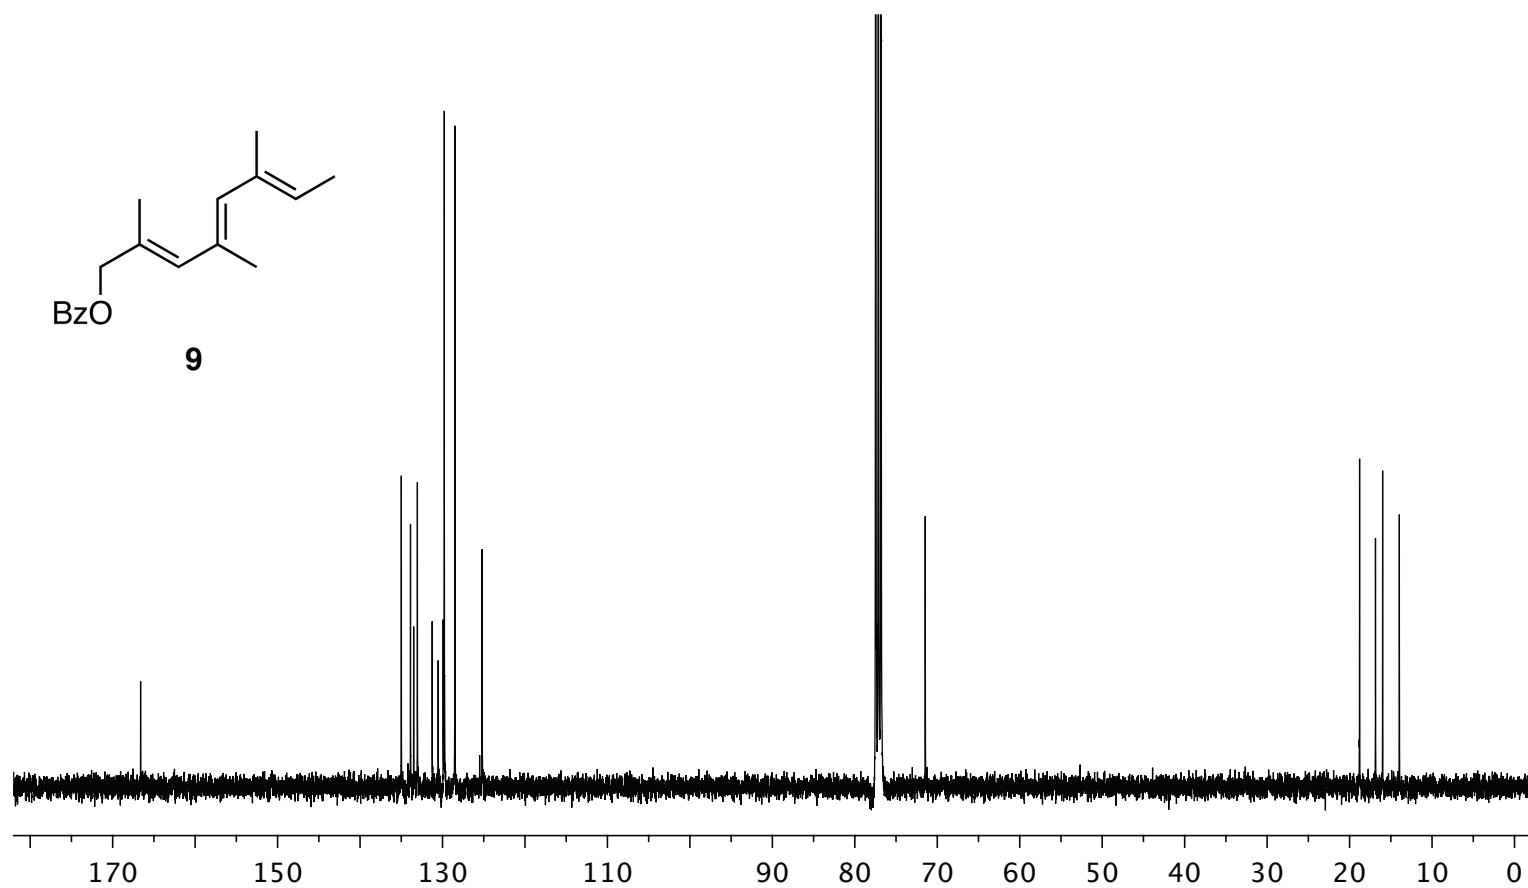

$^1\text{H-NMR}$  (400 MHz) and  $^{13}\text{C-NMR}$  (100 MHz) spectra of Diels-Alder adduct **10** in  $\text{CDCl}_3$

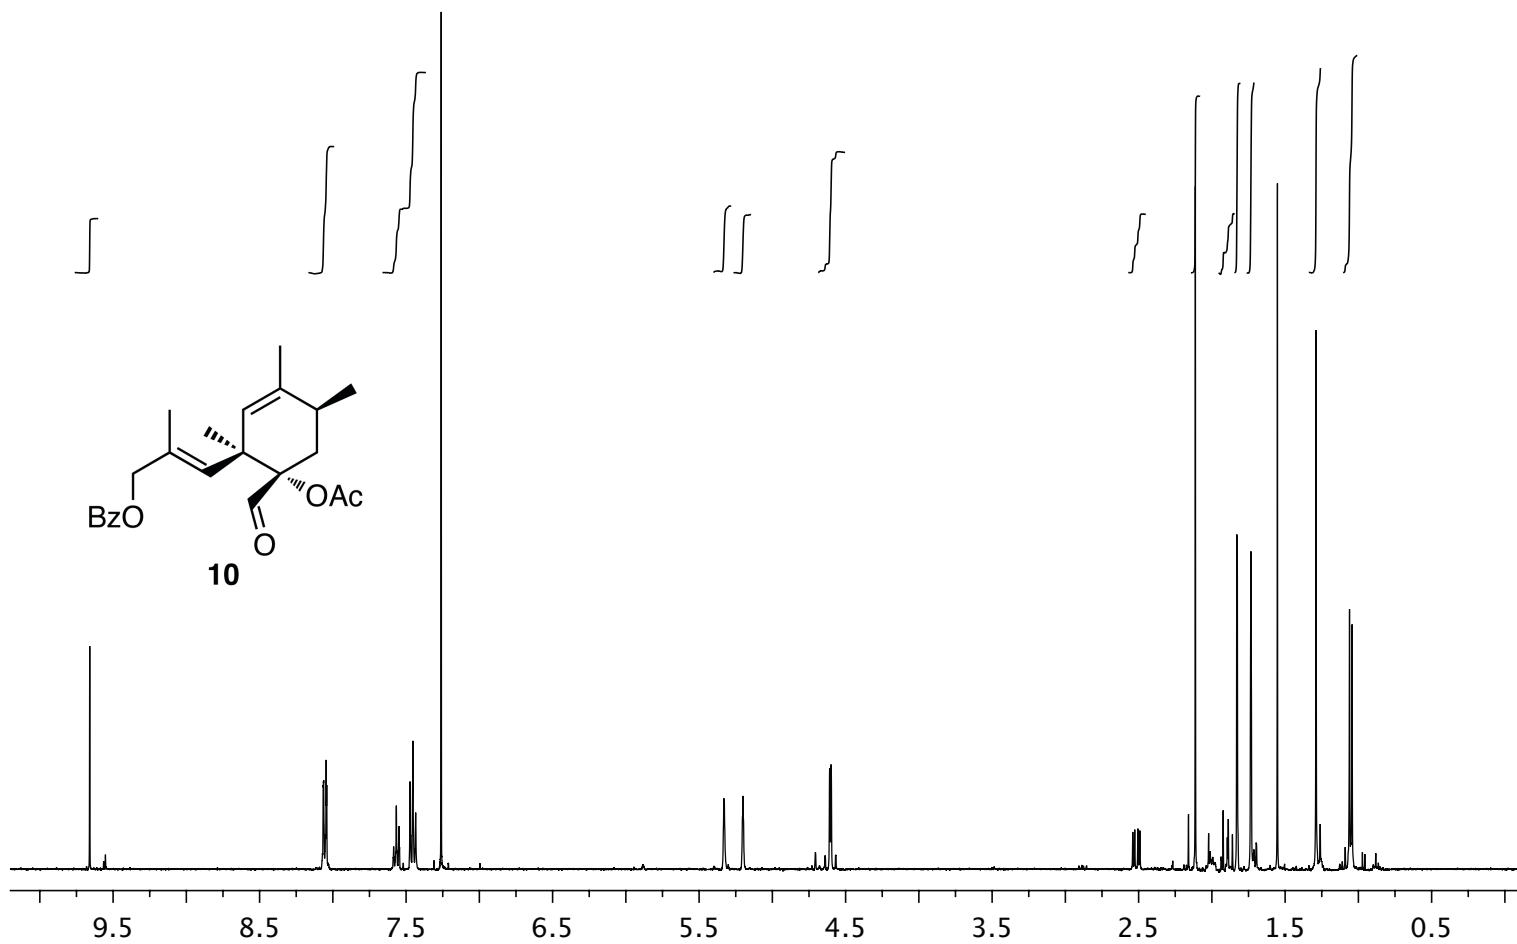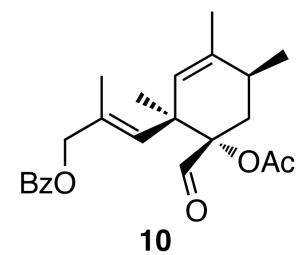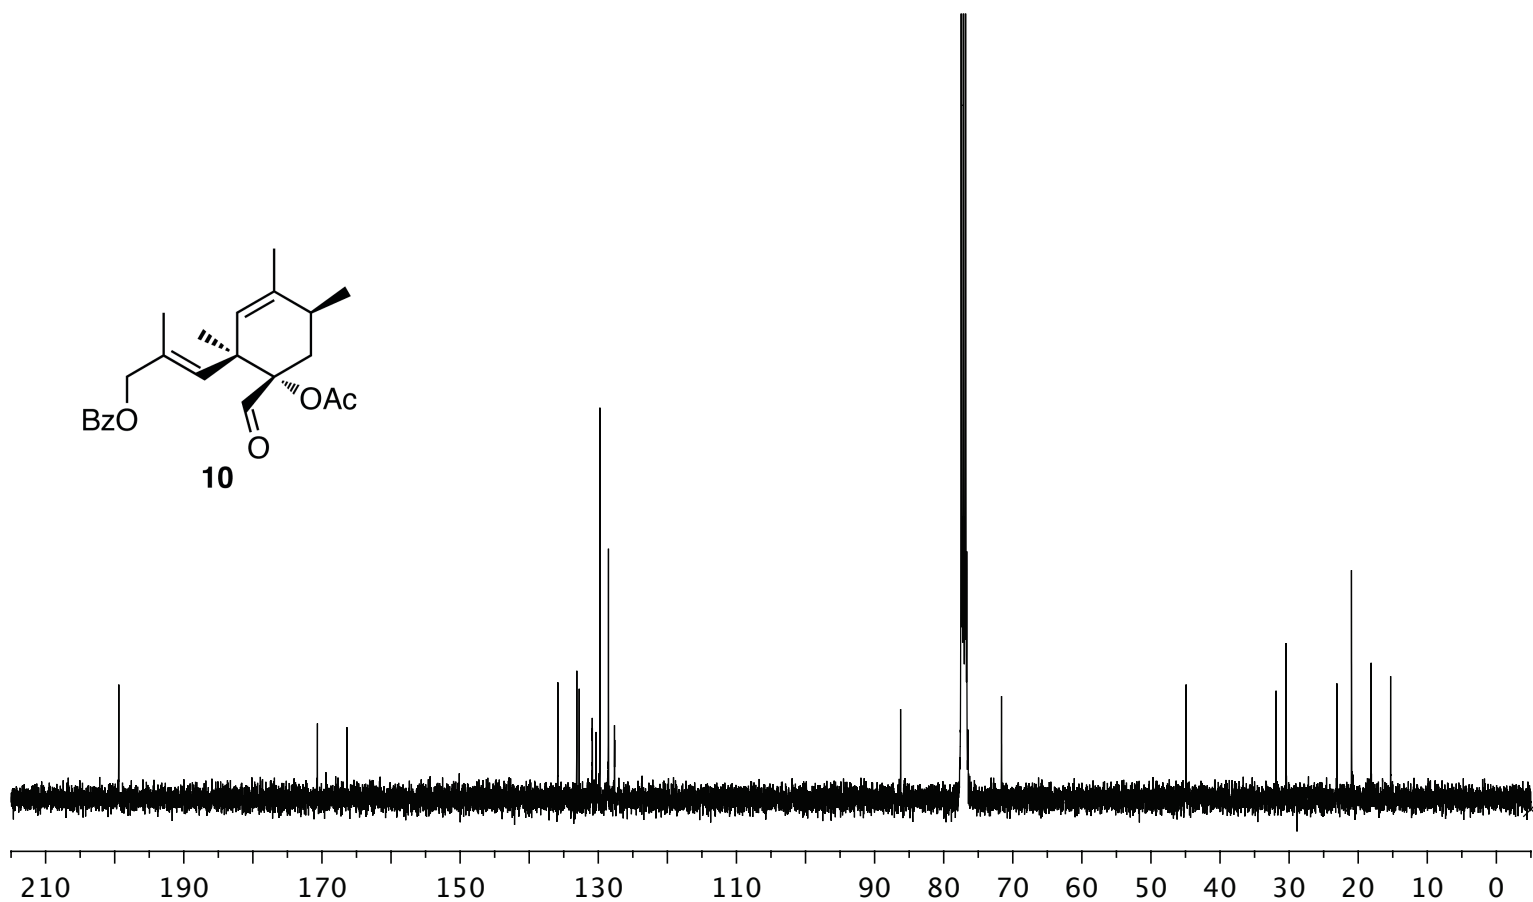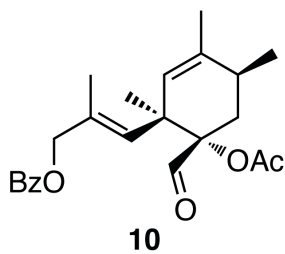

$^1\text{H-NMR}$  (400 MHz) and  $^{13}\text{C-NMR}$  (100 MHz) spectra of benzoate **24** in  $\text{CDCl}_3$

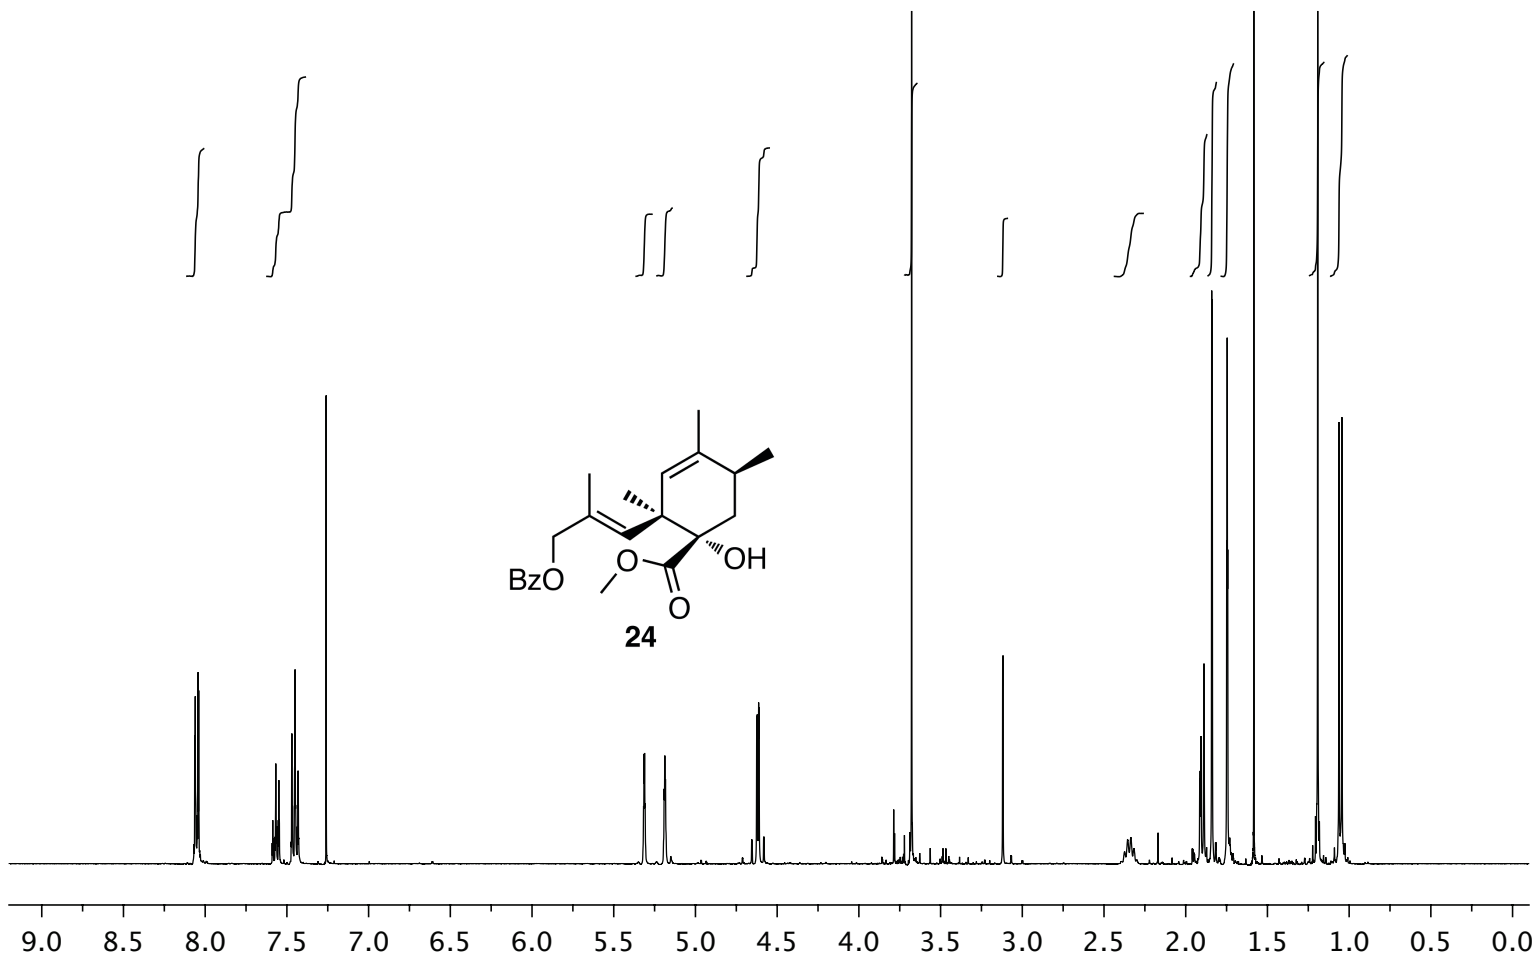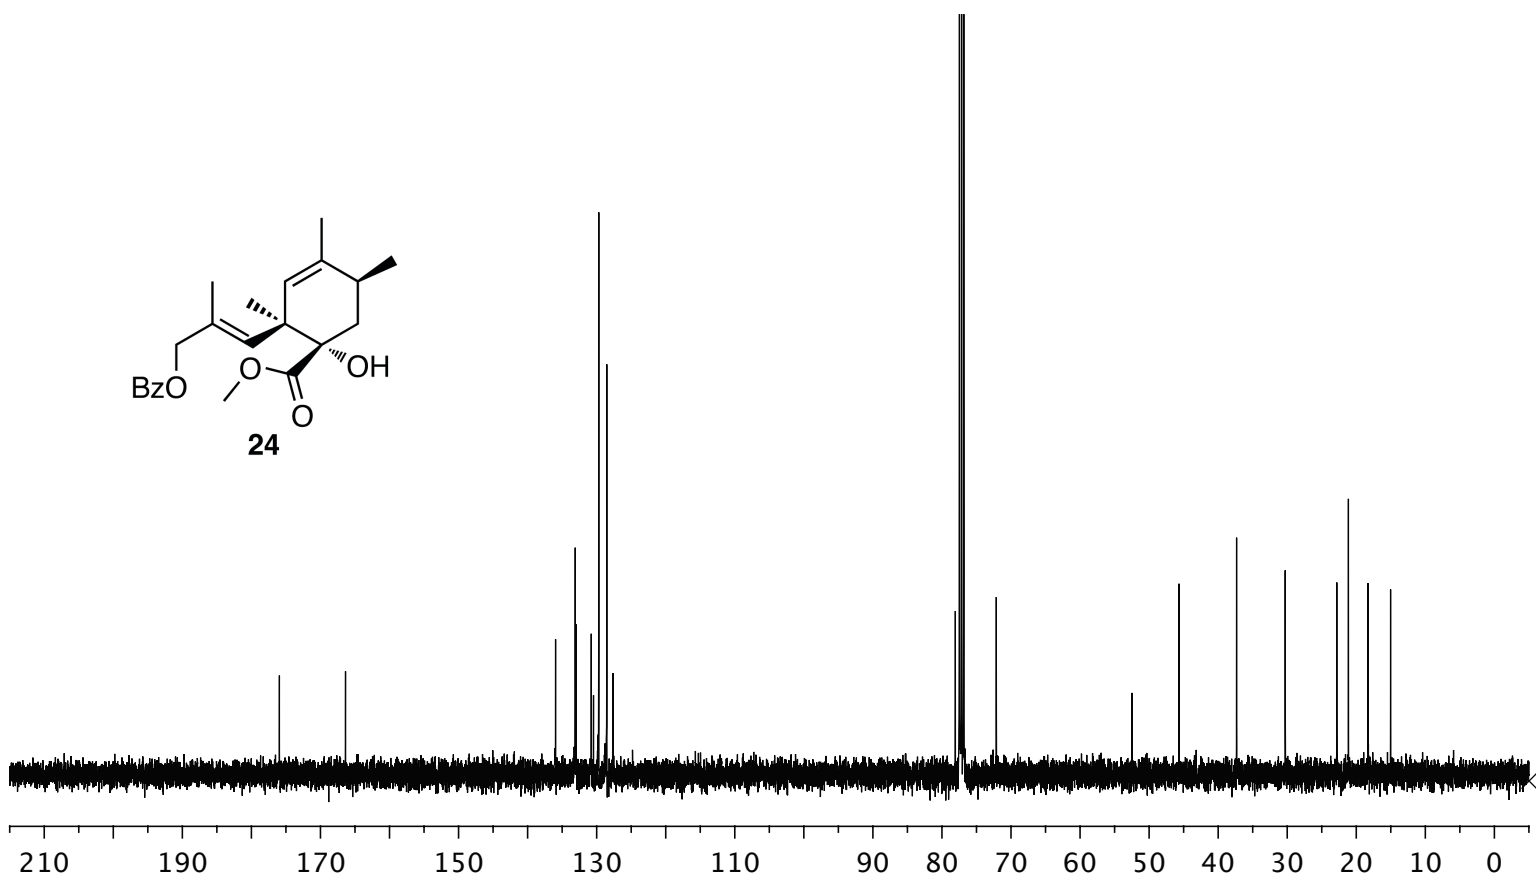



$^1\text{H-NMR}$  (500 MHz) and  $^{13}\text{C-NMR}$  (125 MHz) spectra of diol **11** in  $\text{CDCl}_3$

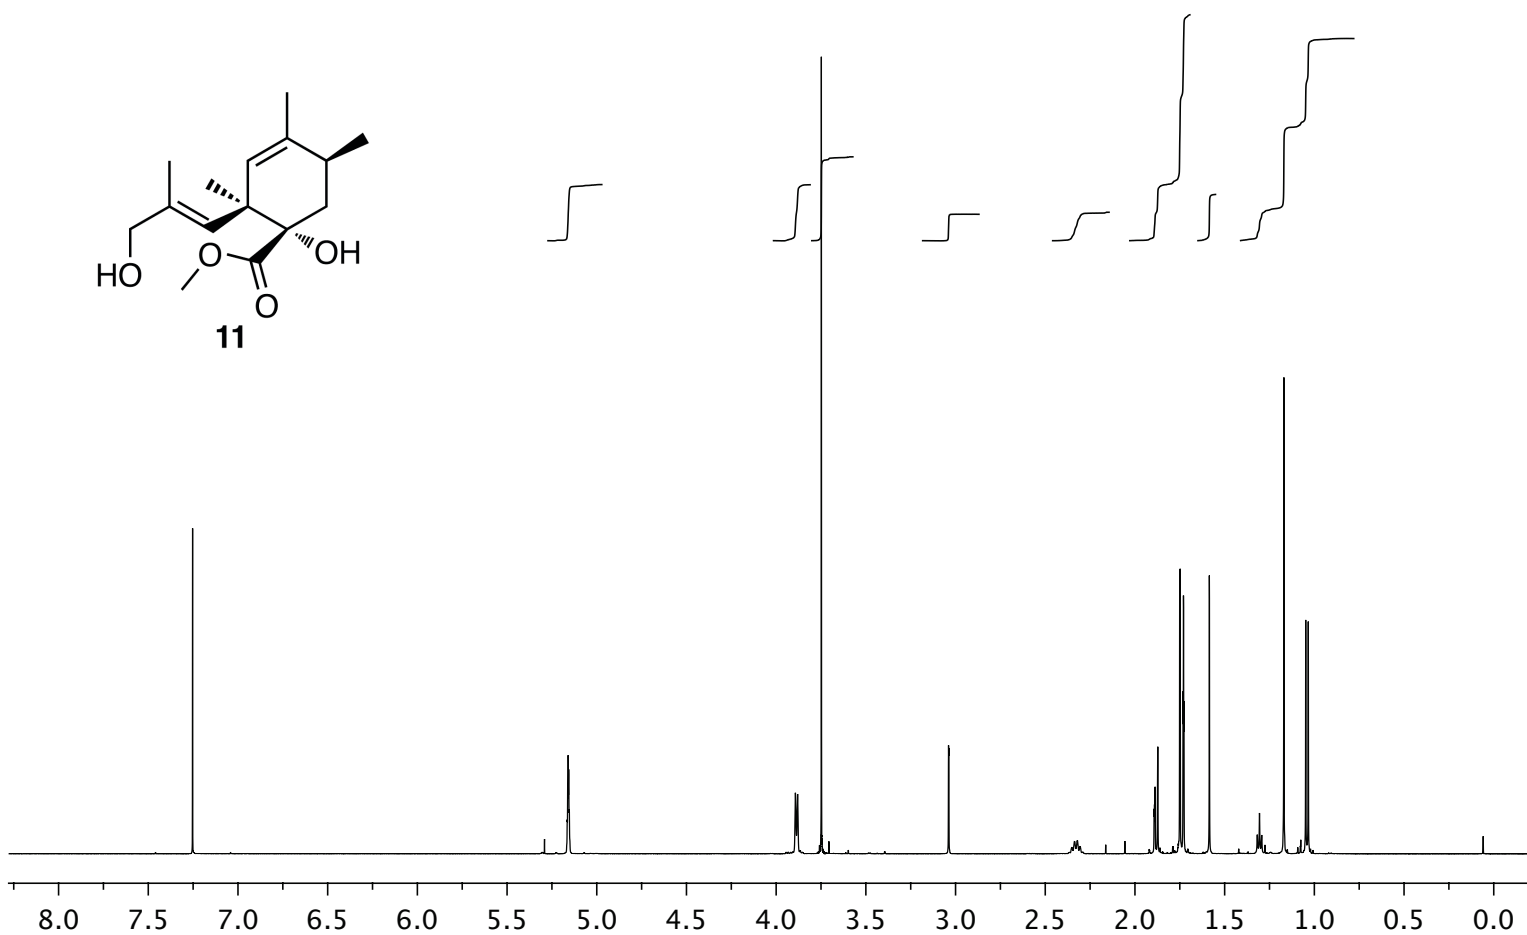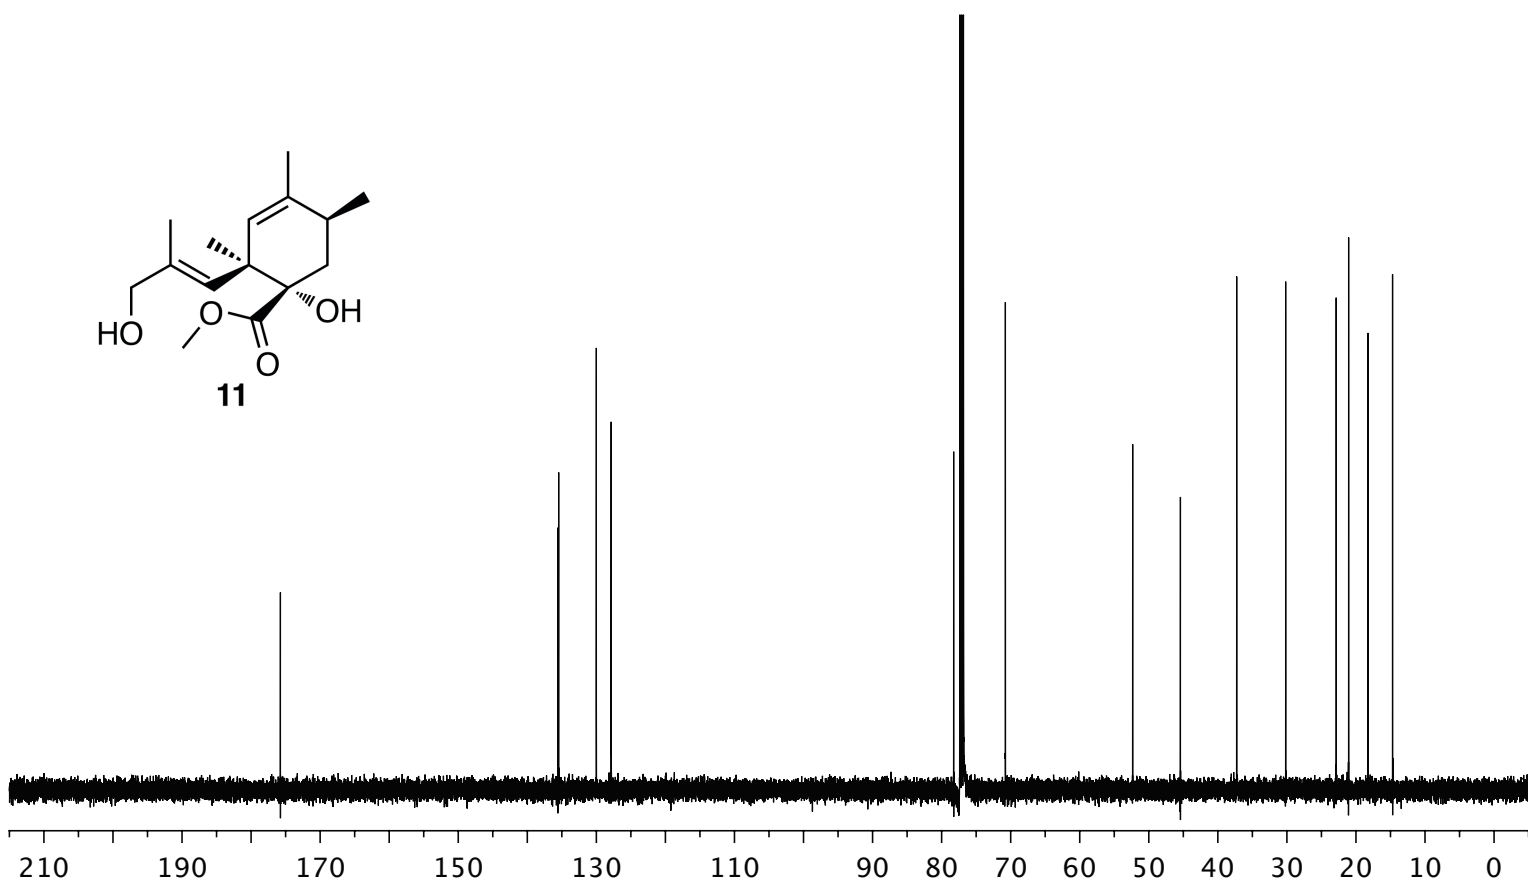

$^1\text{H-NMR}$  (500 MHz) and  $^{13}\text{C-NMR}$  (100 MHz) spectra of 4-bromobenzoate **12** in  $\text{CDCl}_3$

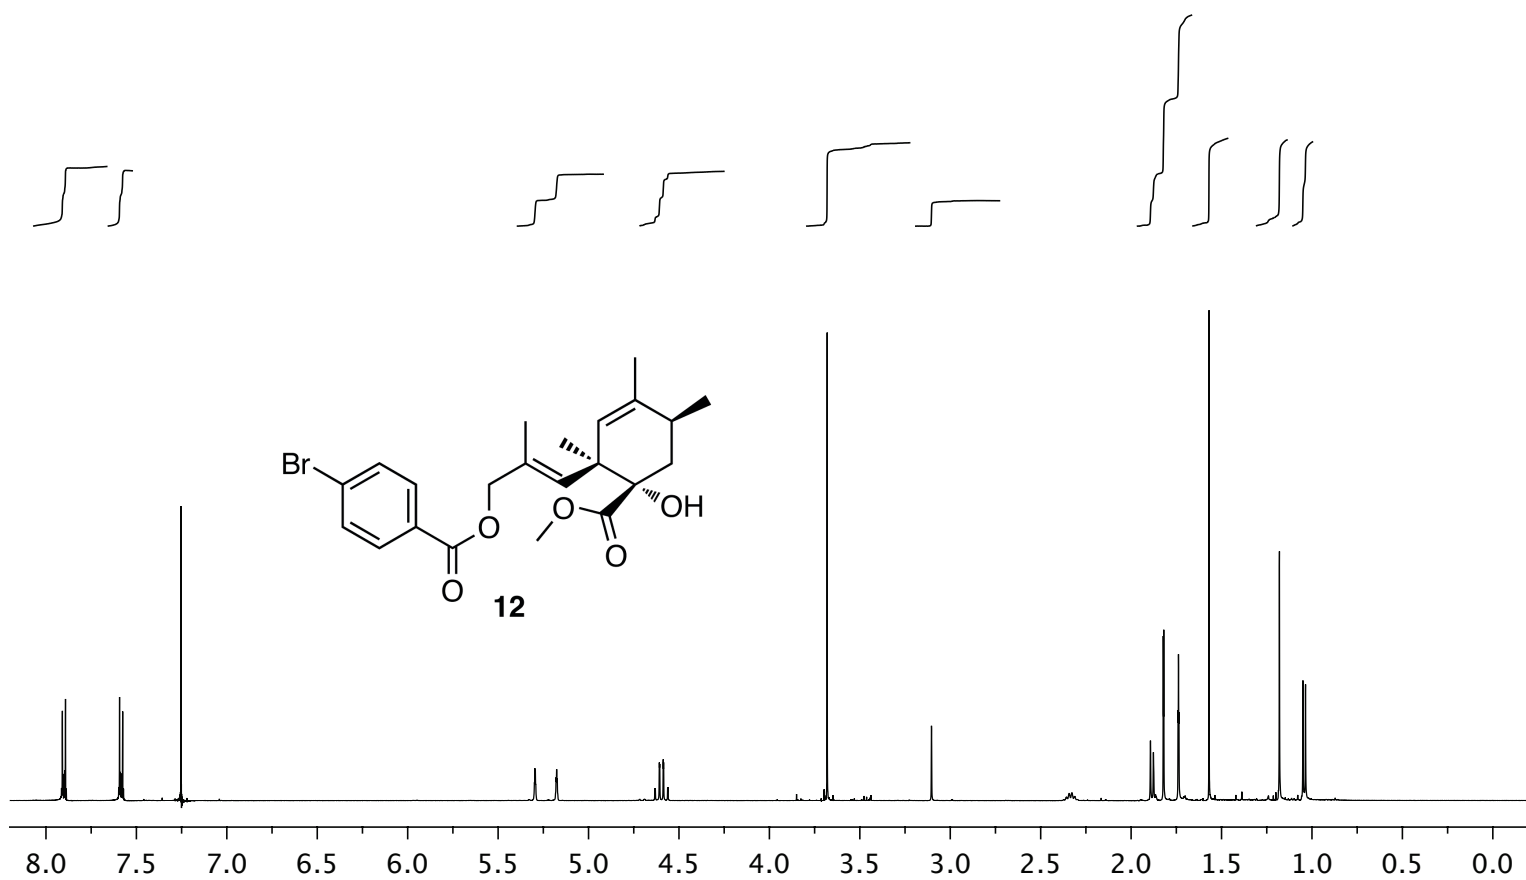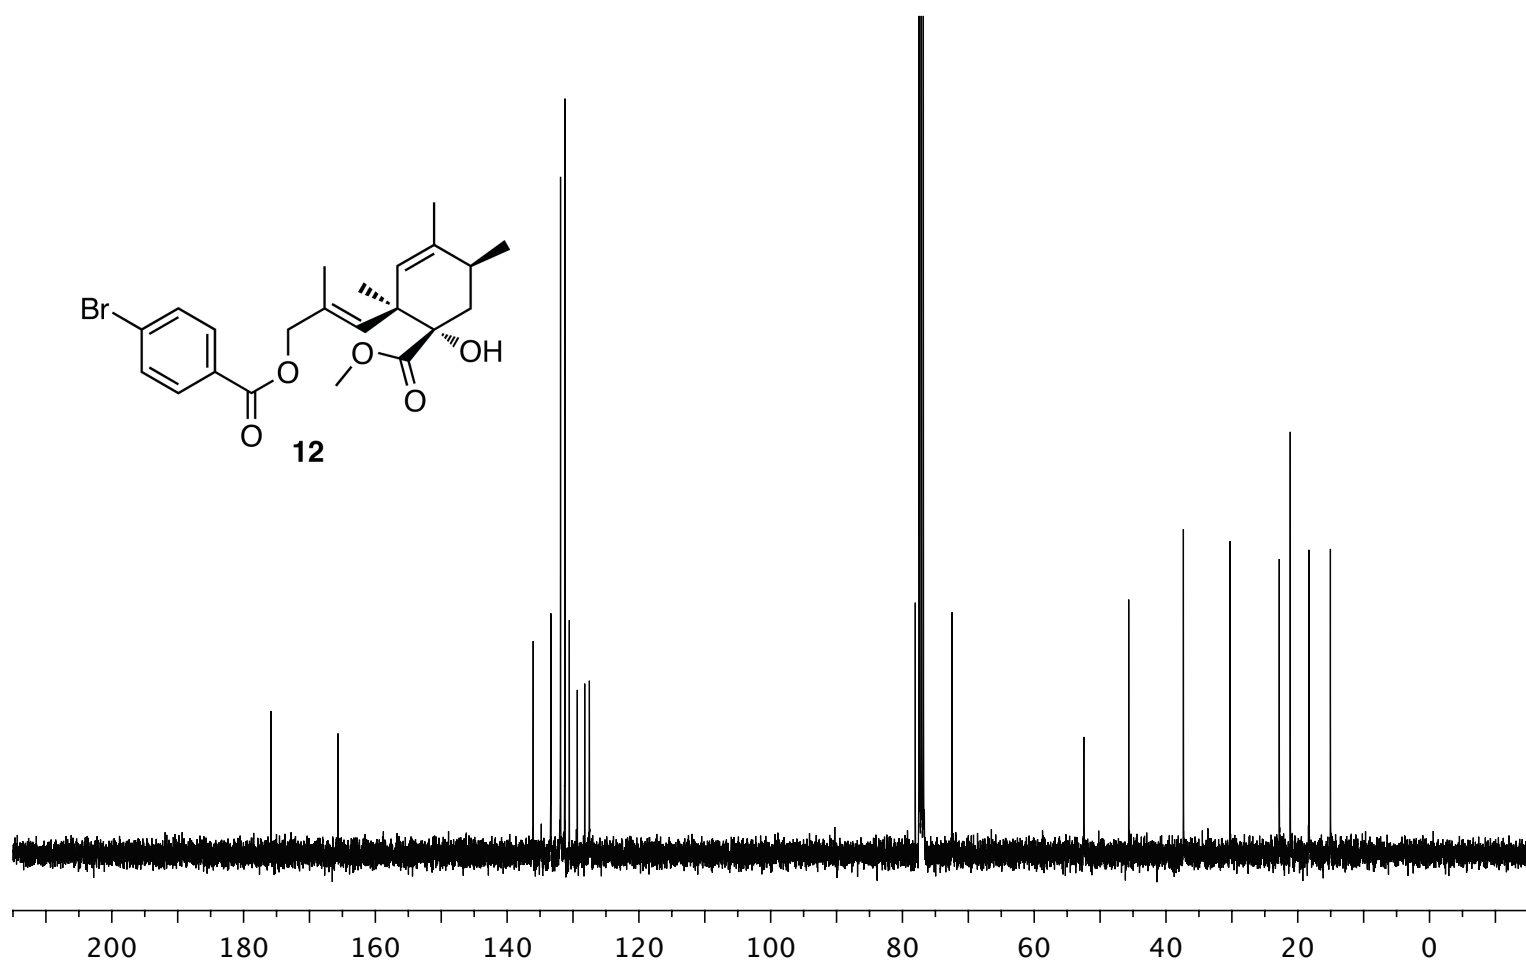

$^1\text{H-NMR}$  (400 MHz) and  $^{13}\text{C-NMR}$  (100 MHz) spectra of bis-acetate **25** in  $\text{CDCl}_3$

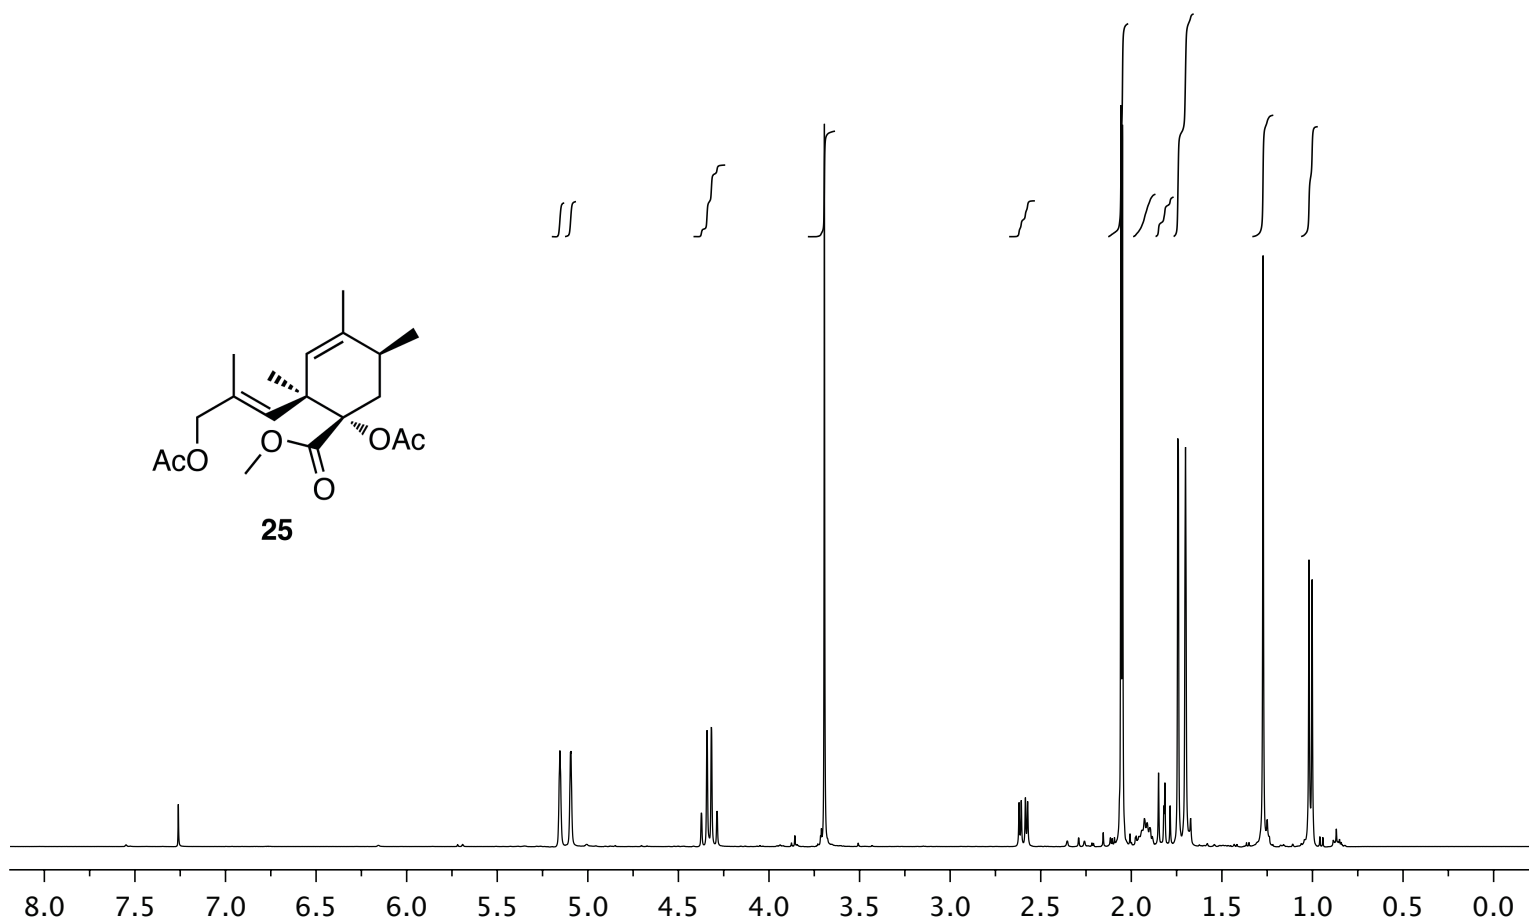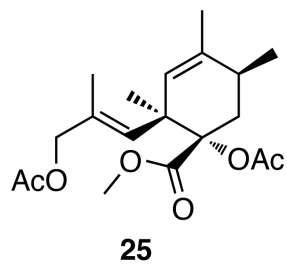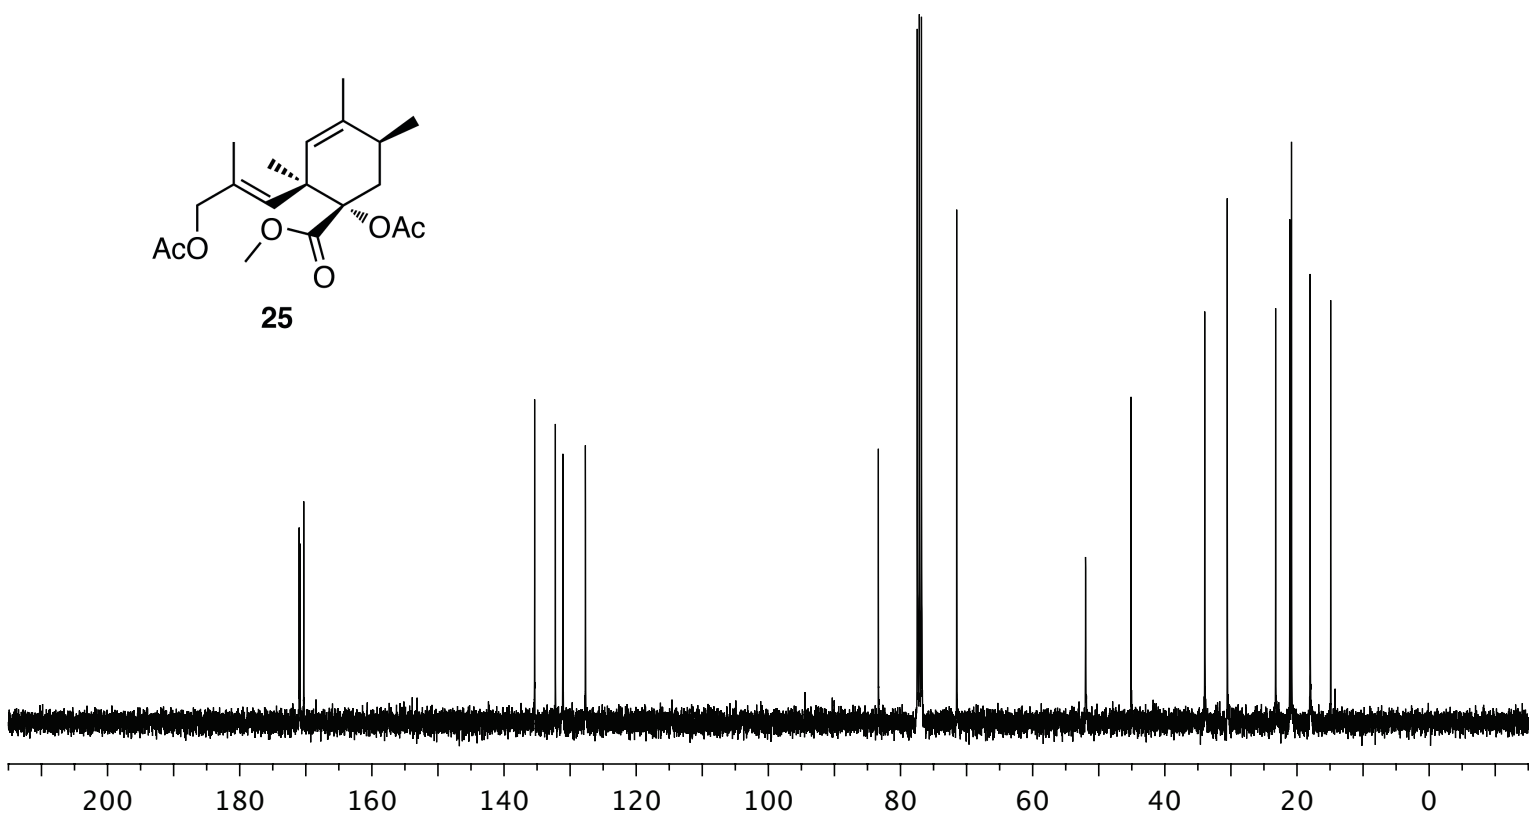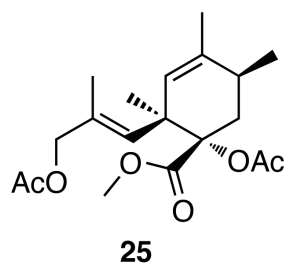

$^1\text{H-NMR}$  (400 MHz) and  $^{13}\text{C-NMR}$  (100 MHz) spectra of alcohol **26** in  $\text{CDCl}_3$

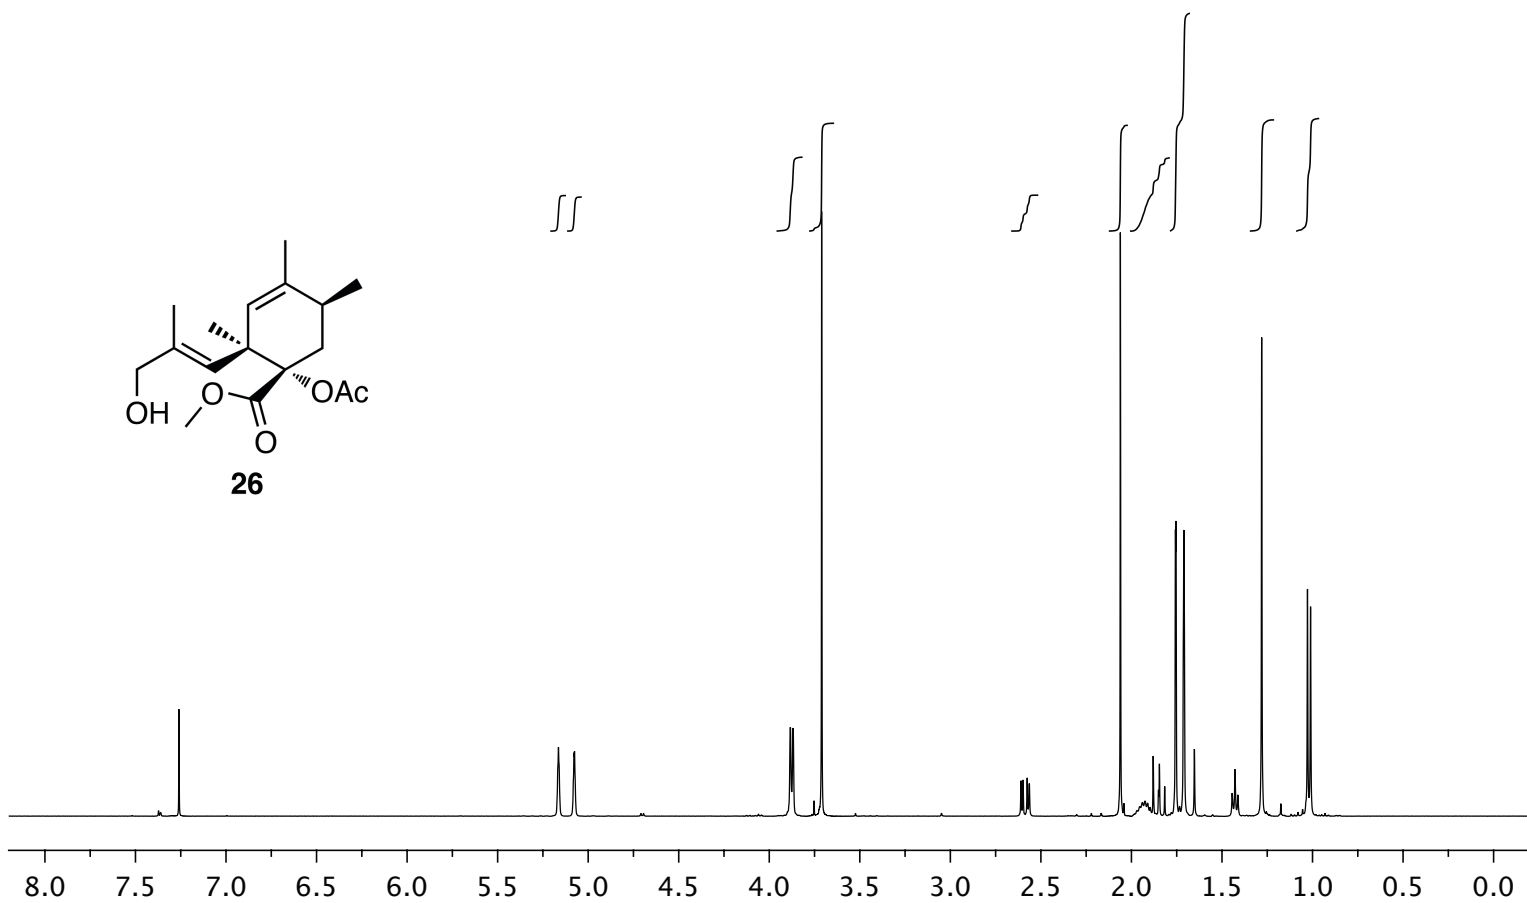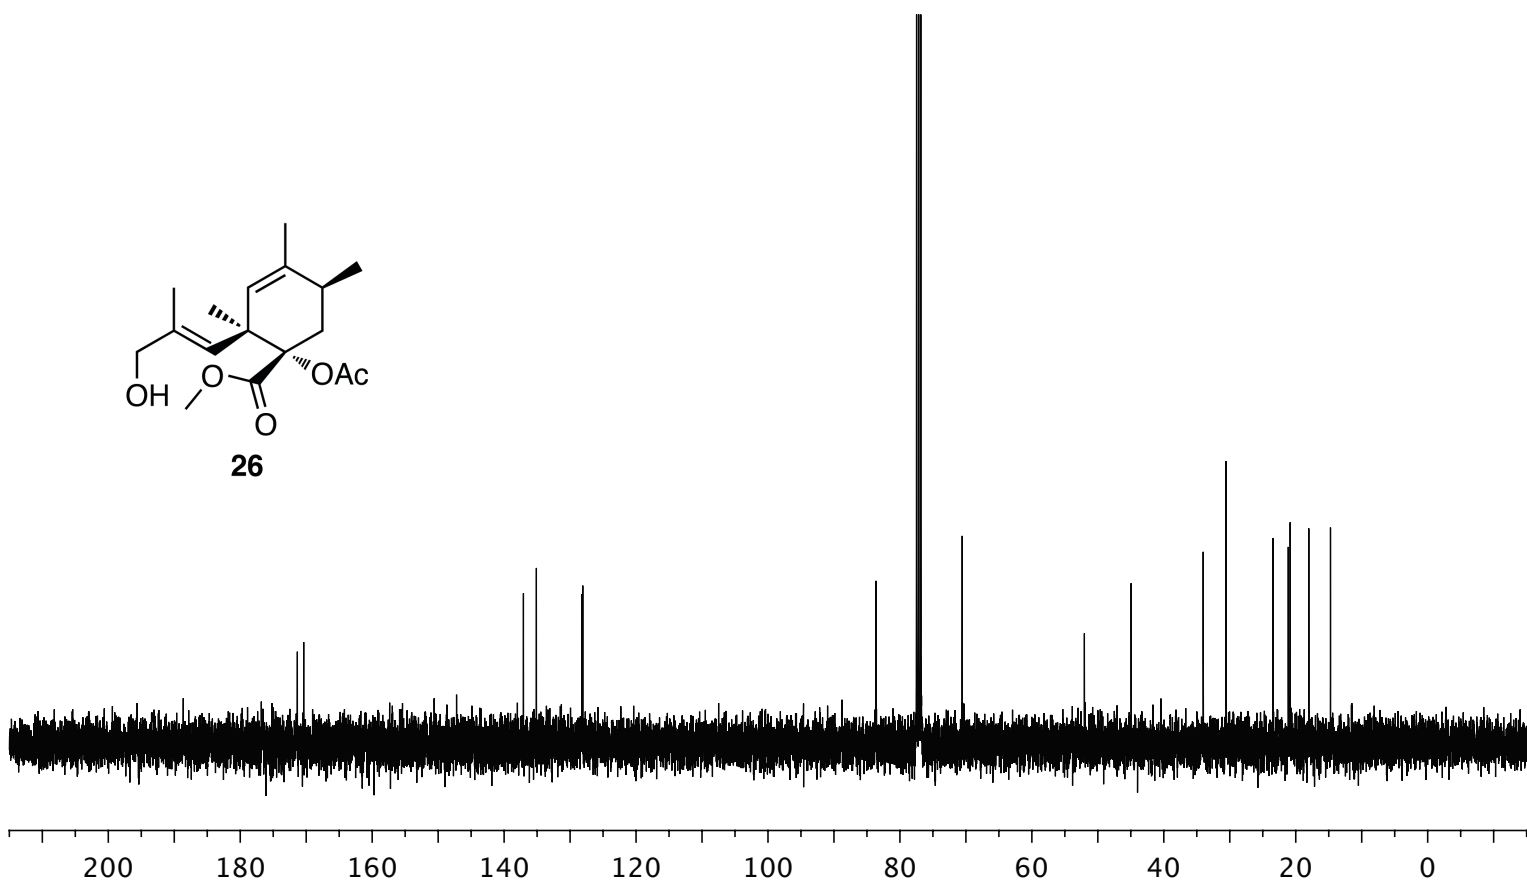

$^1\text{H-NMR}$  (400 MHz) and  $^{13}\text{C-NMR}$  (100 MHz) spectra of silyl ether **13** in  $\text{CDCl}_3$

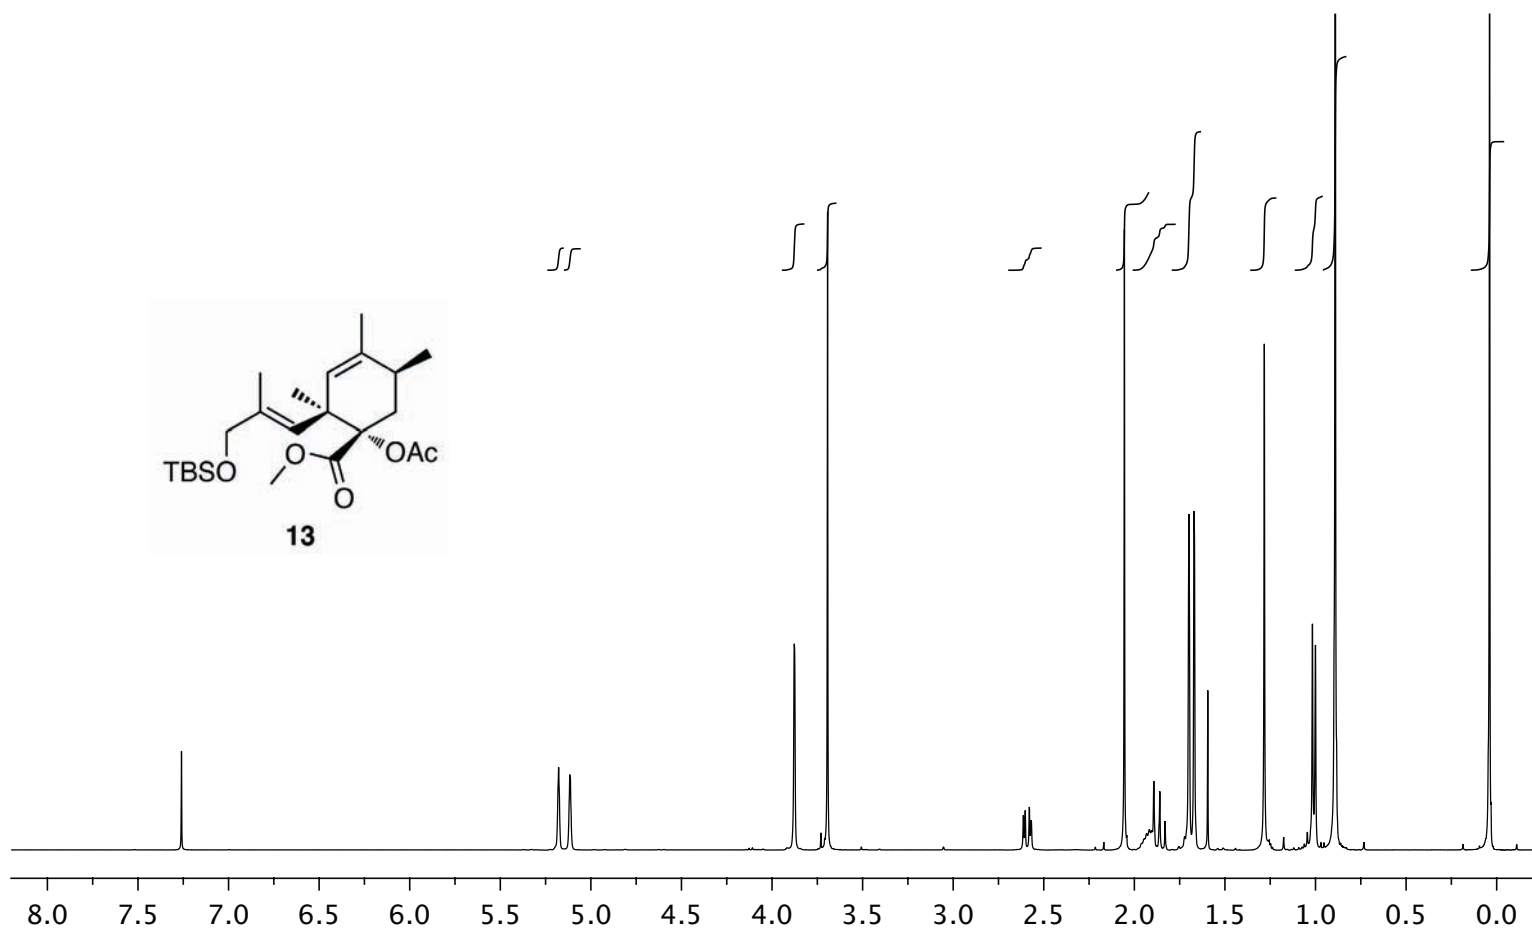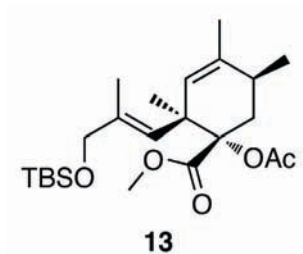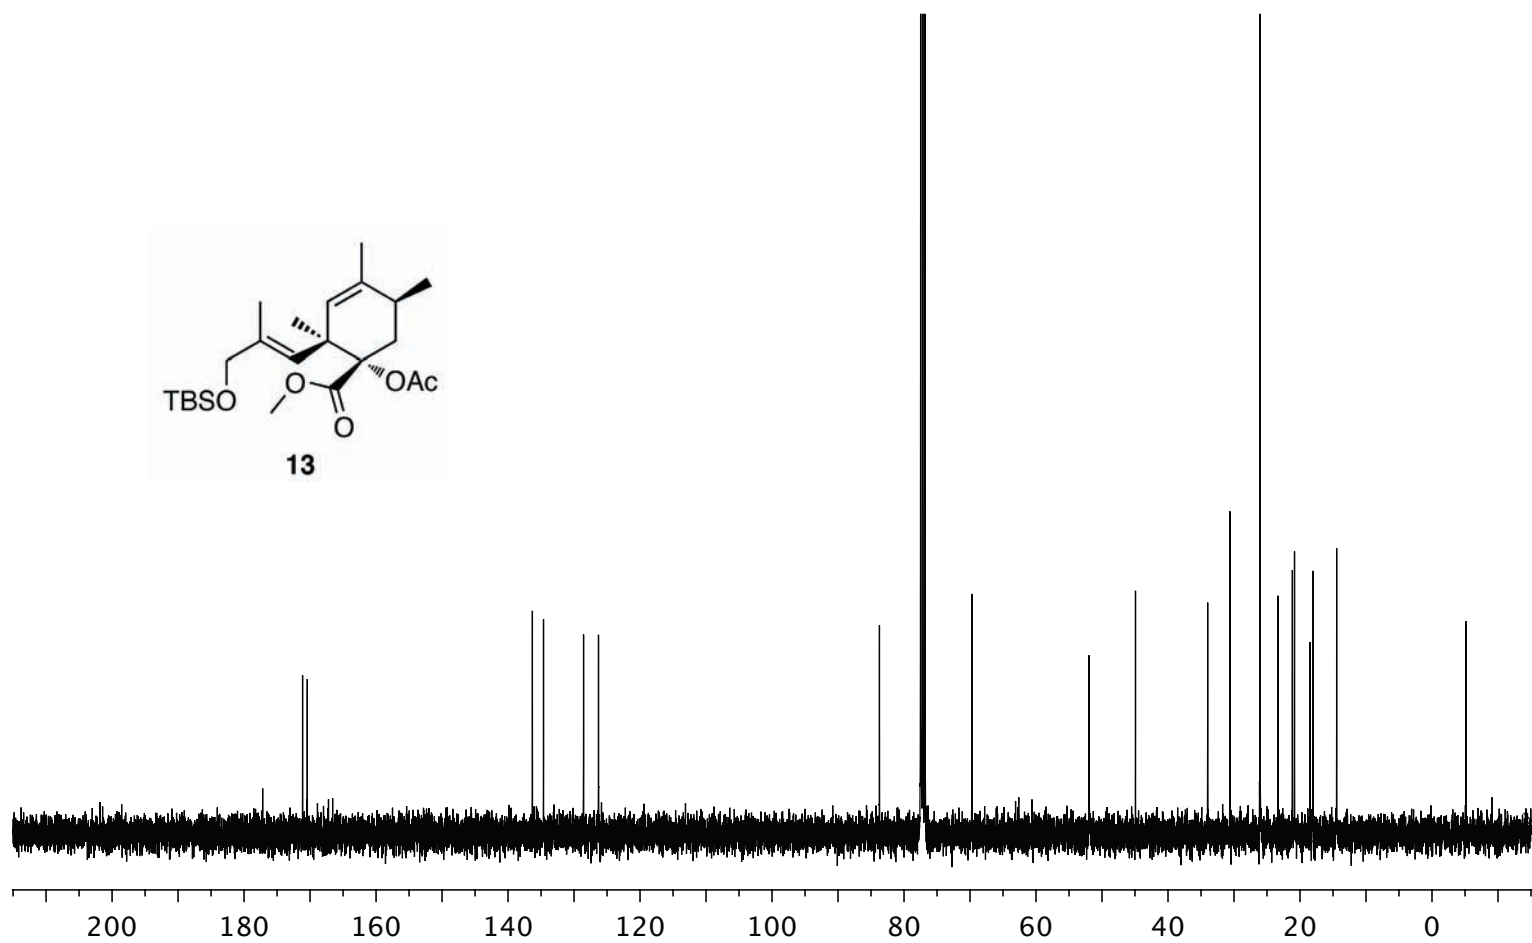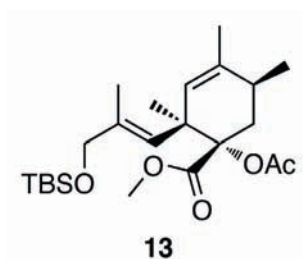

$^1\text{H-NMR}$  (400 MHz) and  $^{13}\text{C-NMR}$  (100 MHz) spectra of tetronate component **5** in  $\text{CDCl}_3$

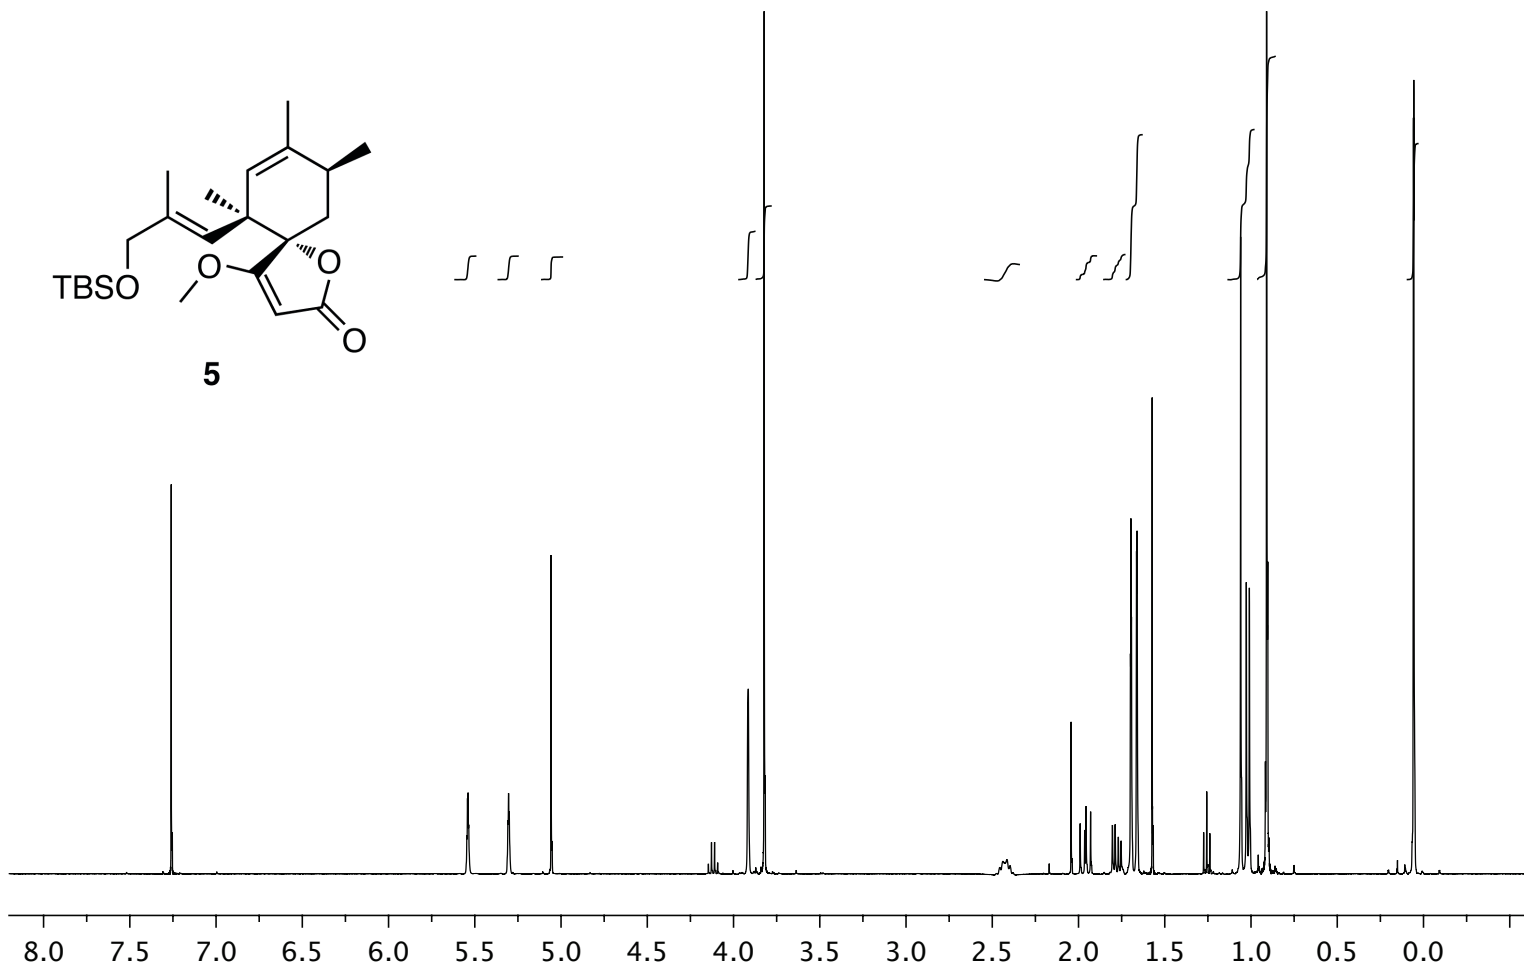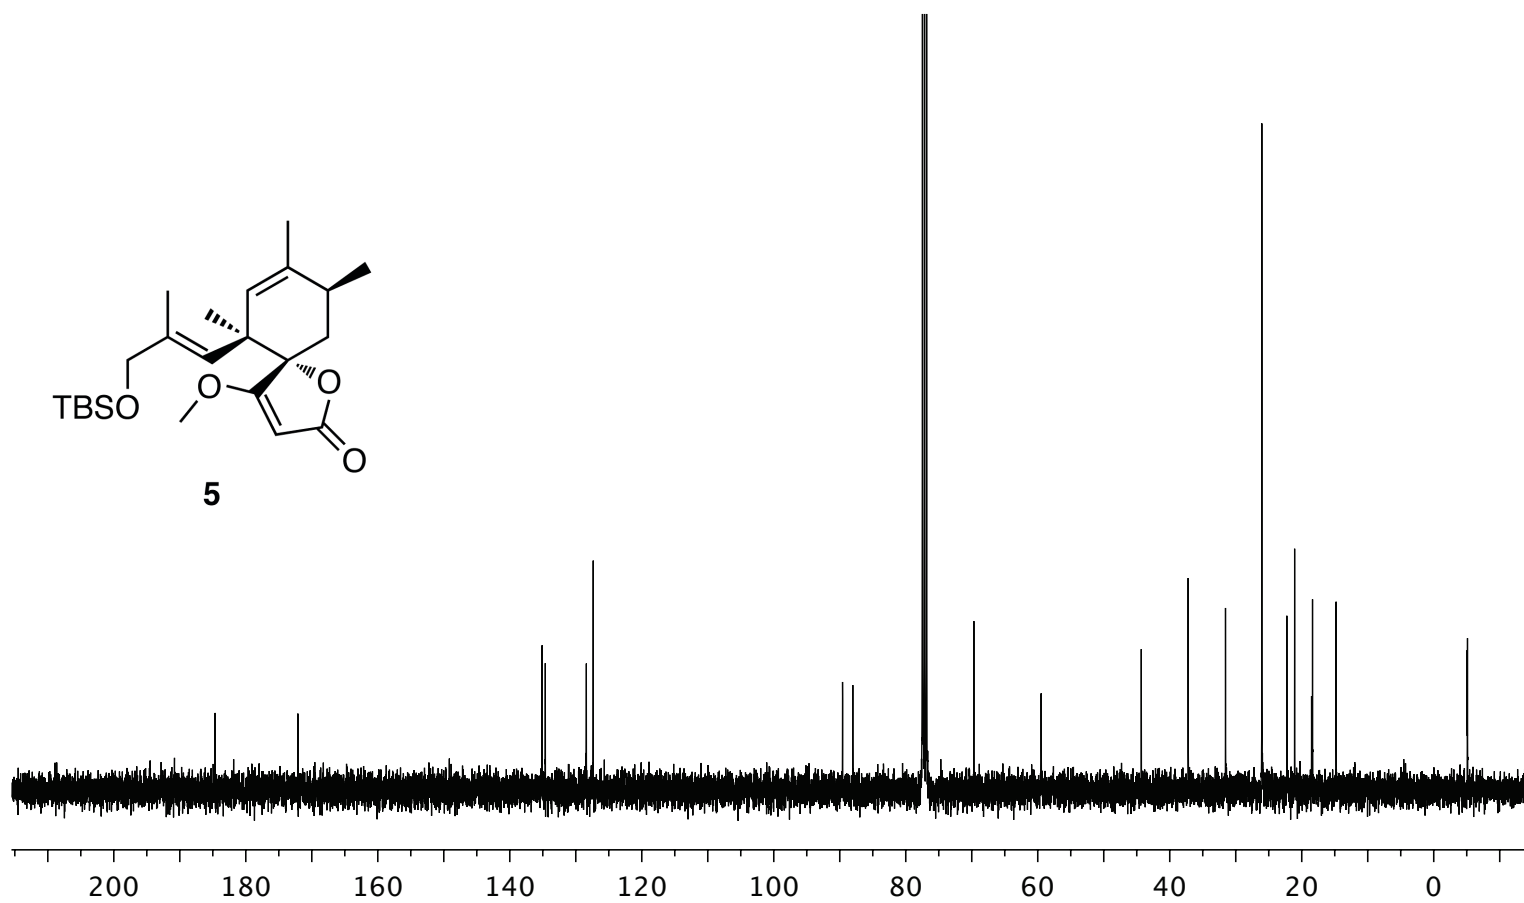

$^1\text{H-NMR}$  (500 MHz) and  $^{13}\text{C-NMR}$  (125 MHz) spectra of sulfide **27** in  $\text{CDCl}_3$

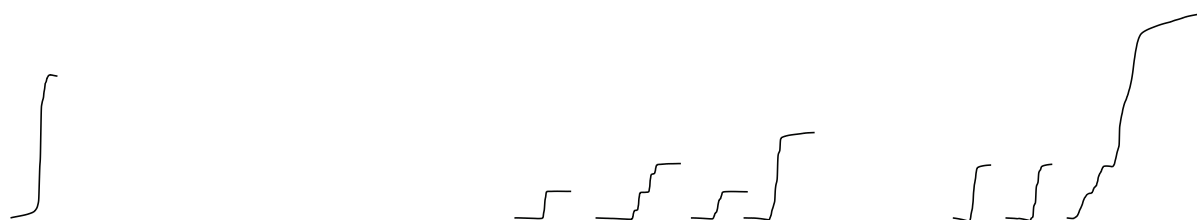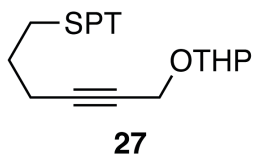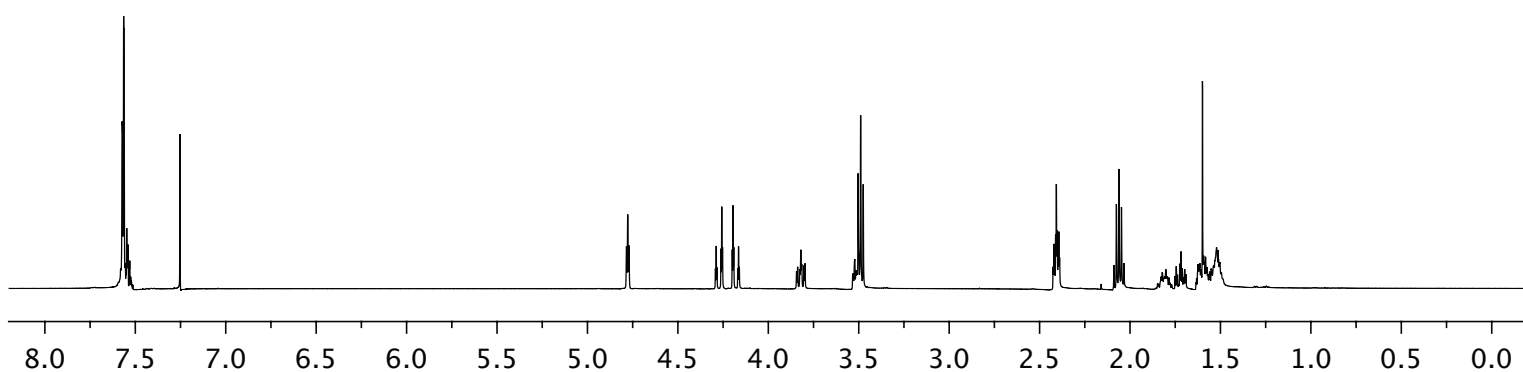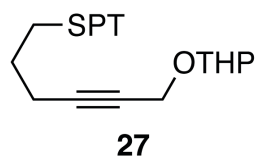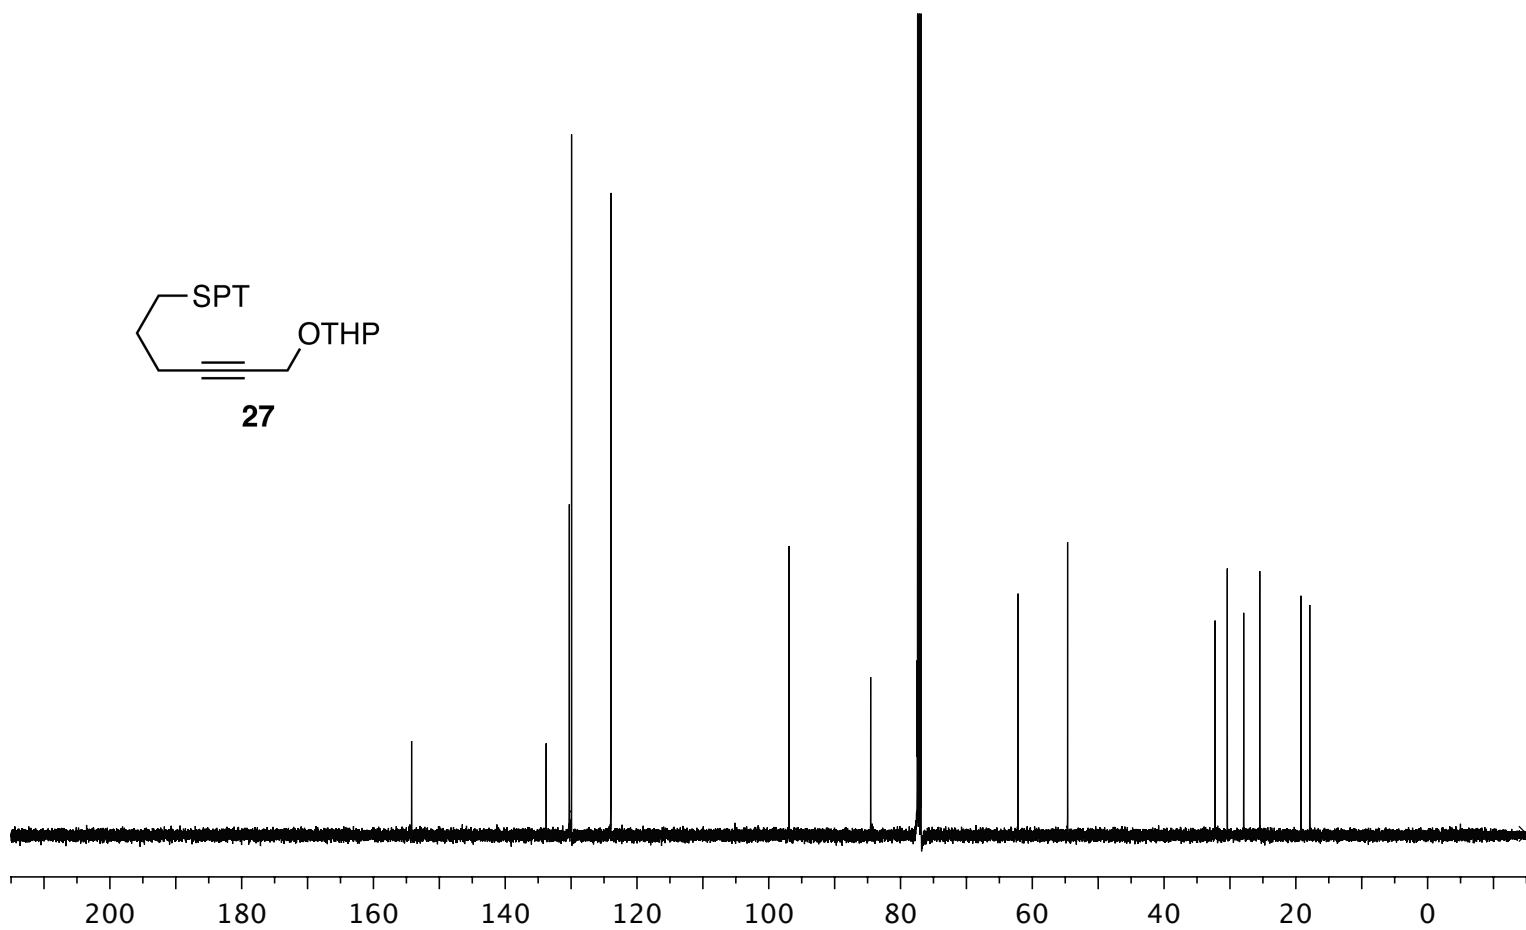

$^1\text{H-NMR}$  (400 MHz) and  $^{13}\text{C-NMR}$  (125 MHz) spectra of sulfone **15** in  $\text{CDCl}_3$

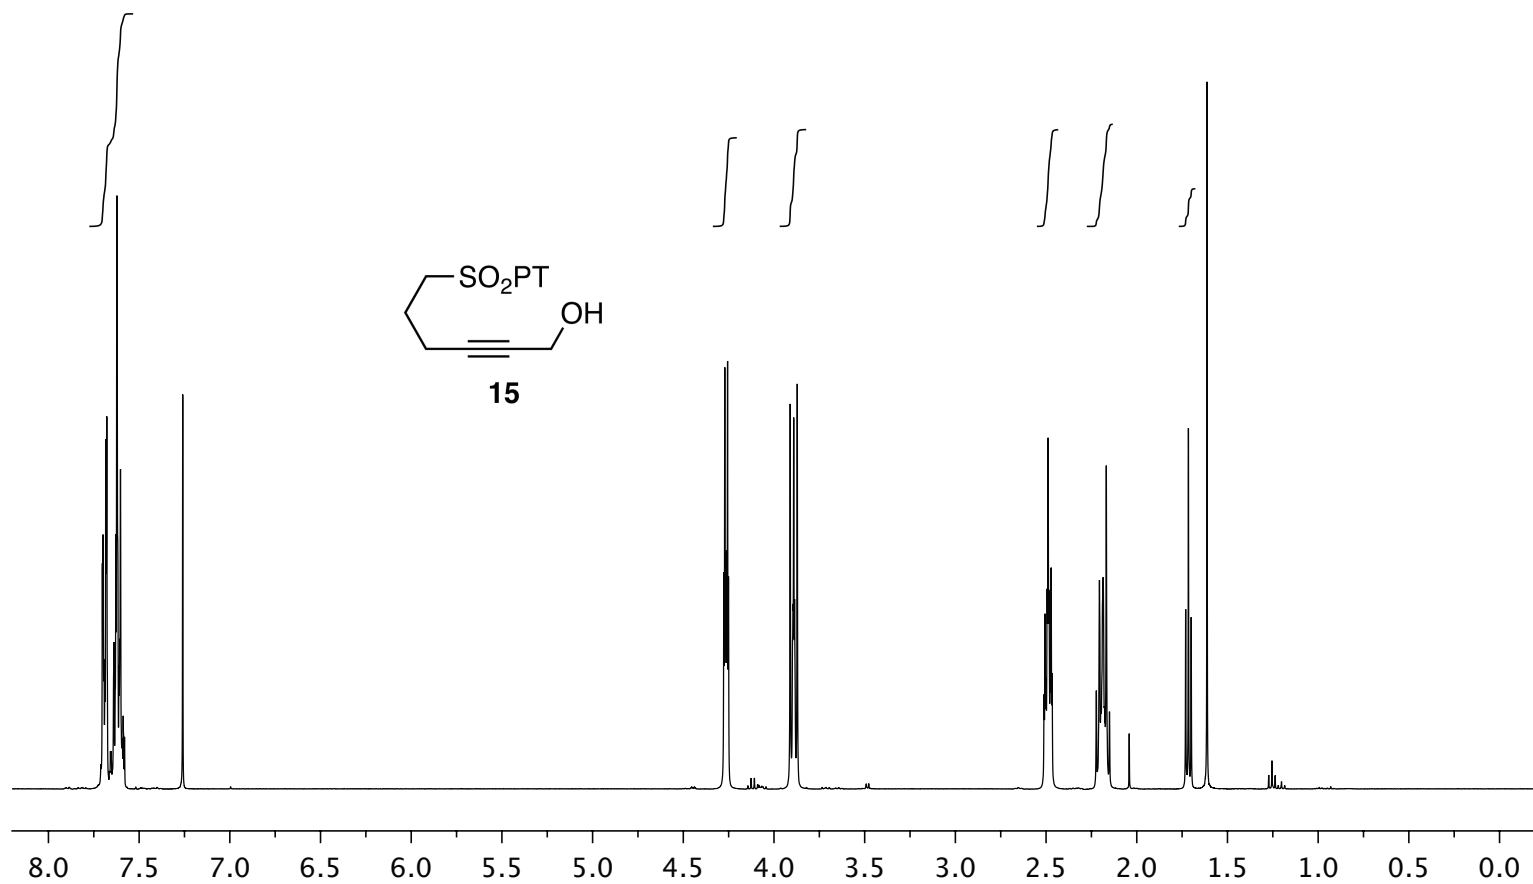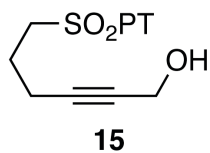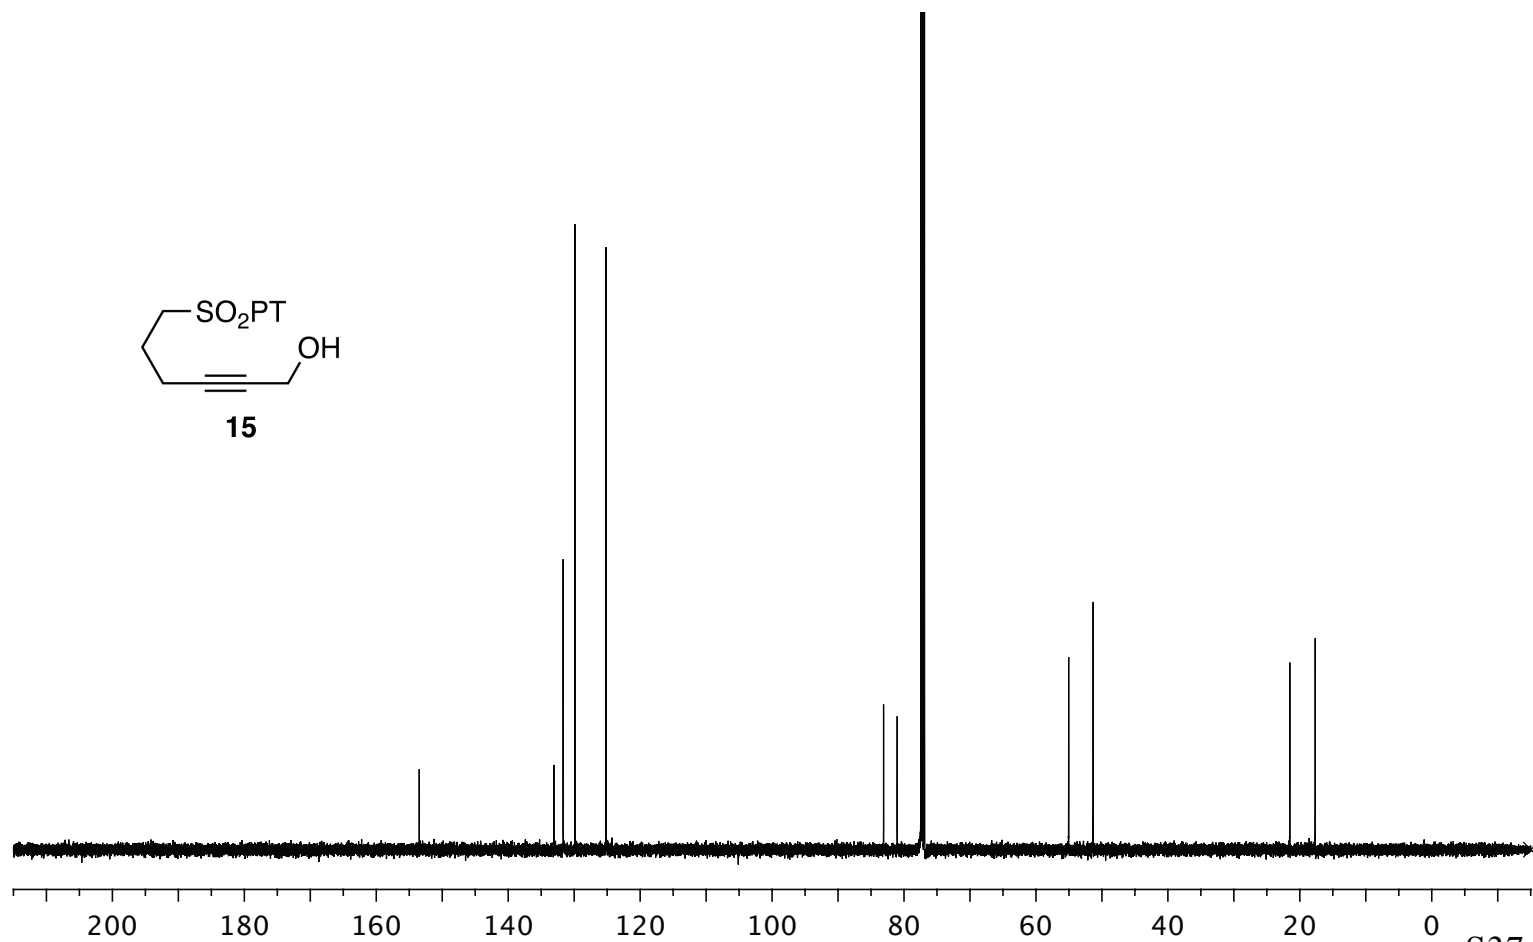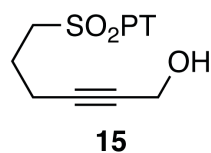



$^1\text{H-NMR}$  (500 MHz) and  $^{13}\text{C-NMR}$  (125 MHz) spectra of vinyl iodide **16** in  $\text{CDCl}_3$

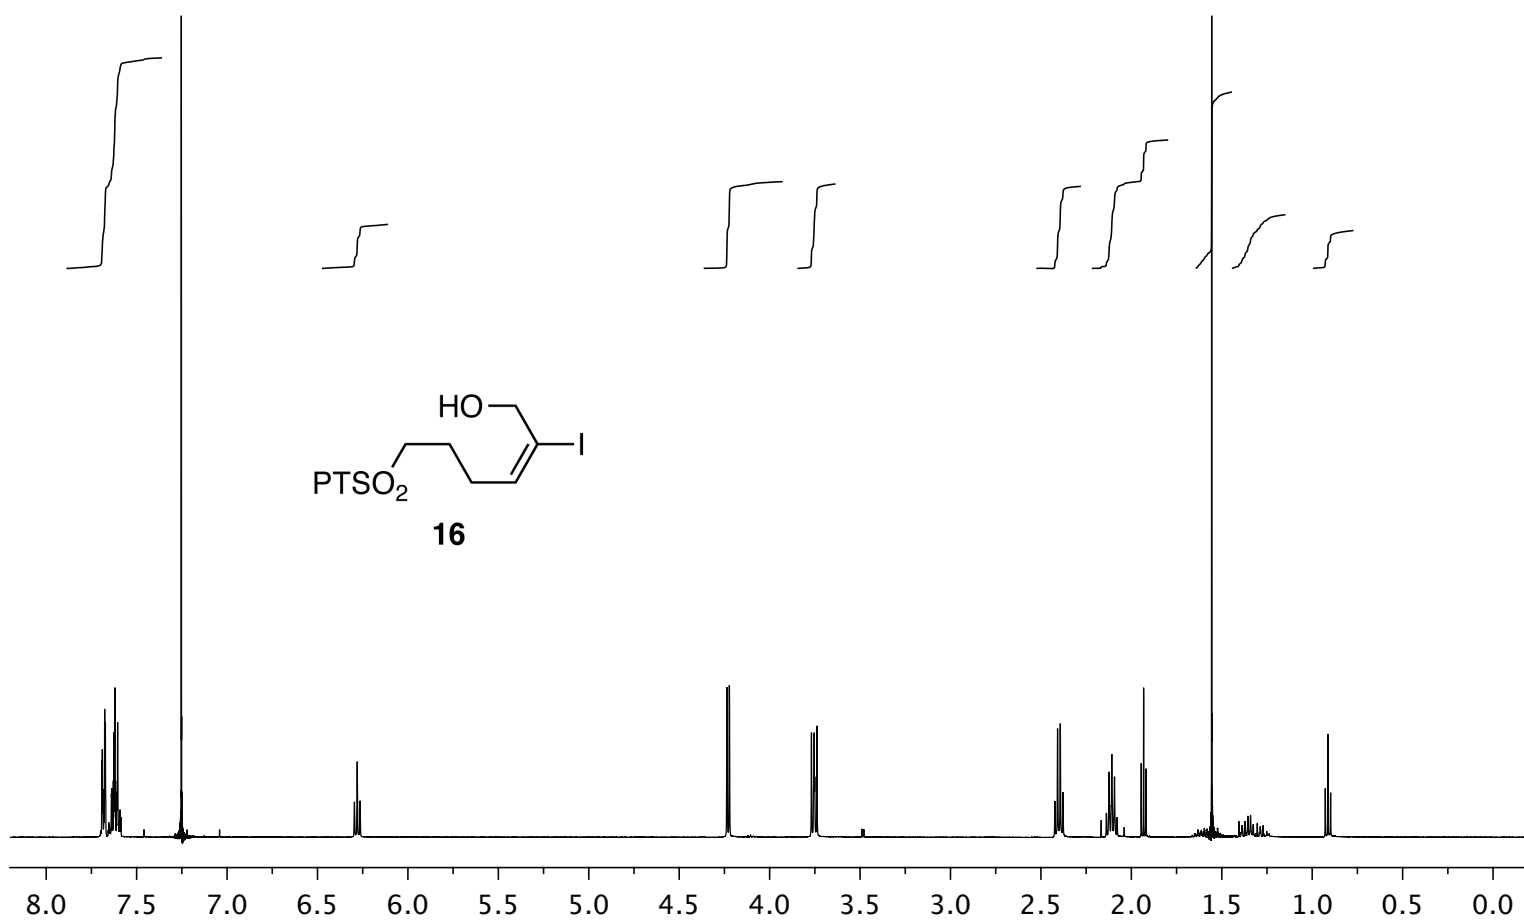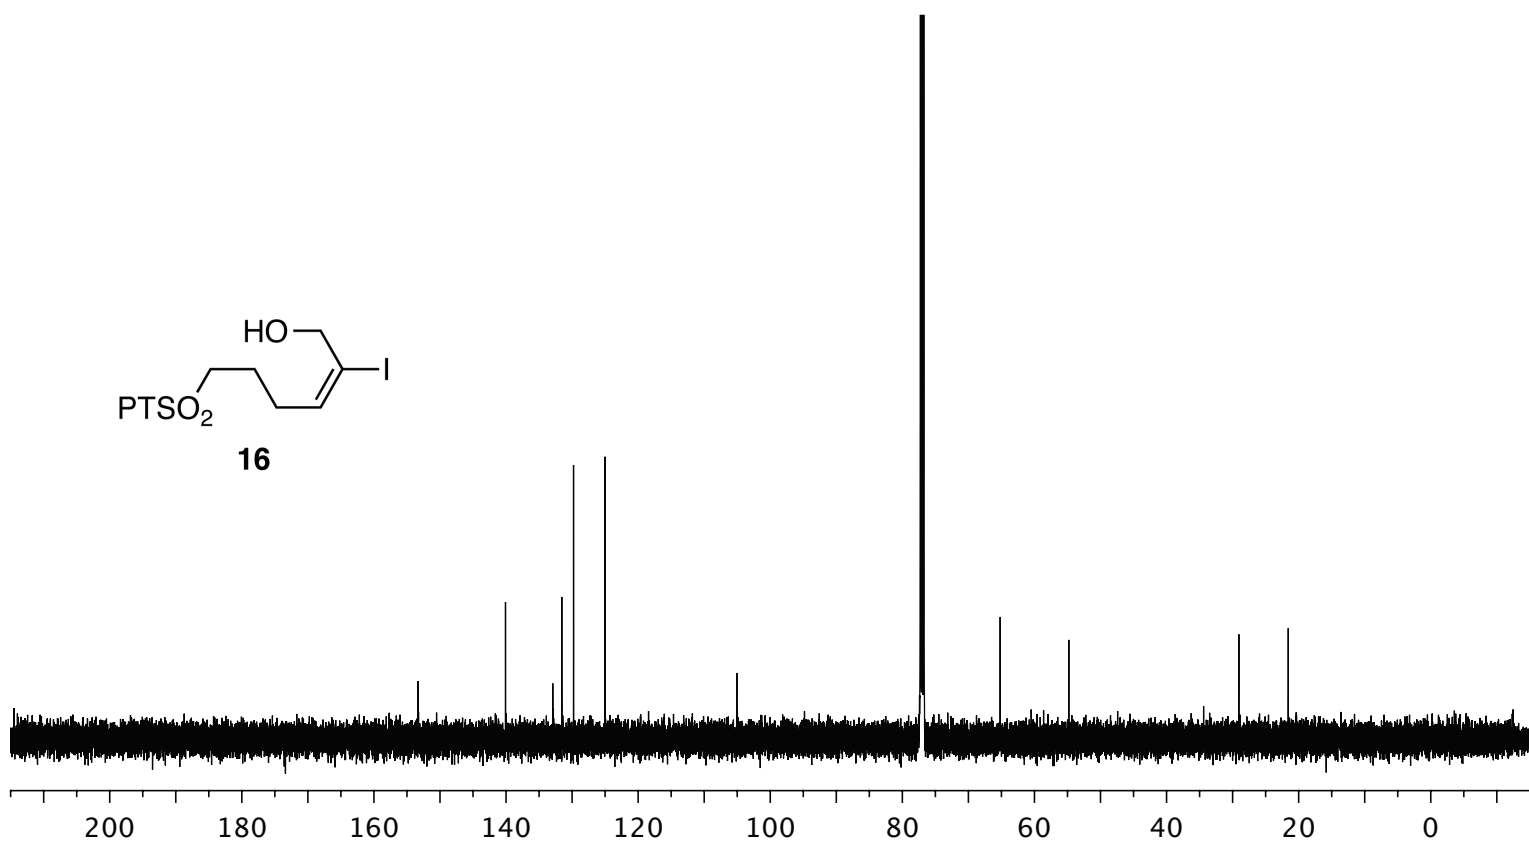



$^1\text{H-NMR}$  (400 MHz) and  $^{13}\text{C-NMR}$  (125 MHz) spectra of vinyl stannanes **4** in  $\text{CDCl}_3$

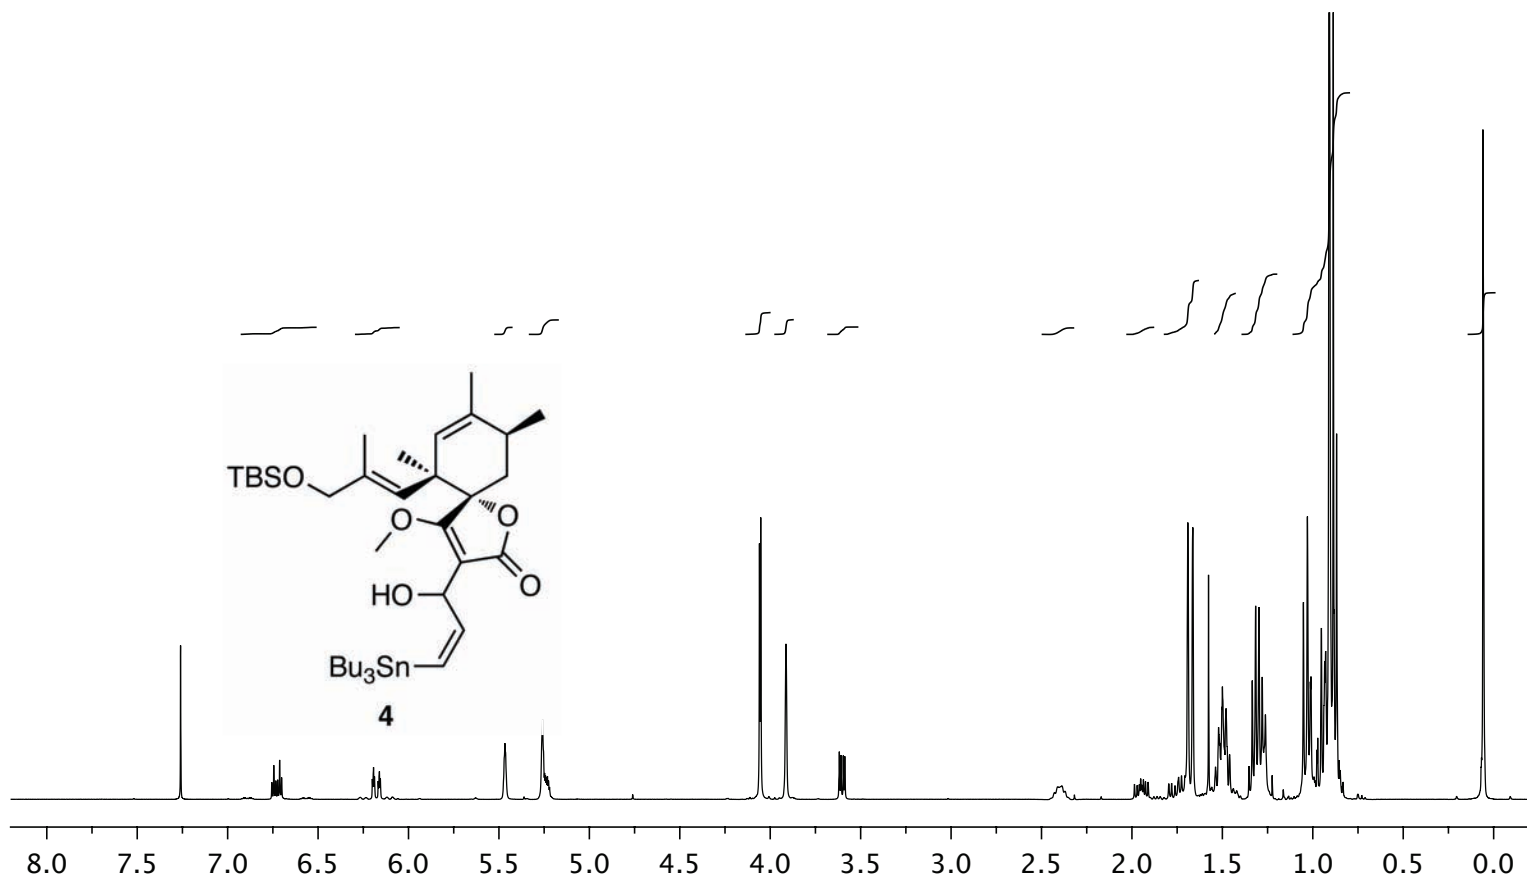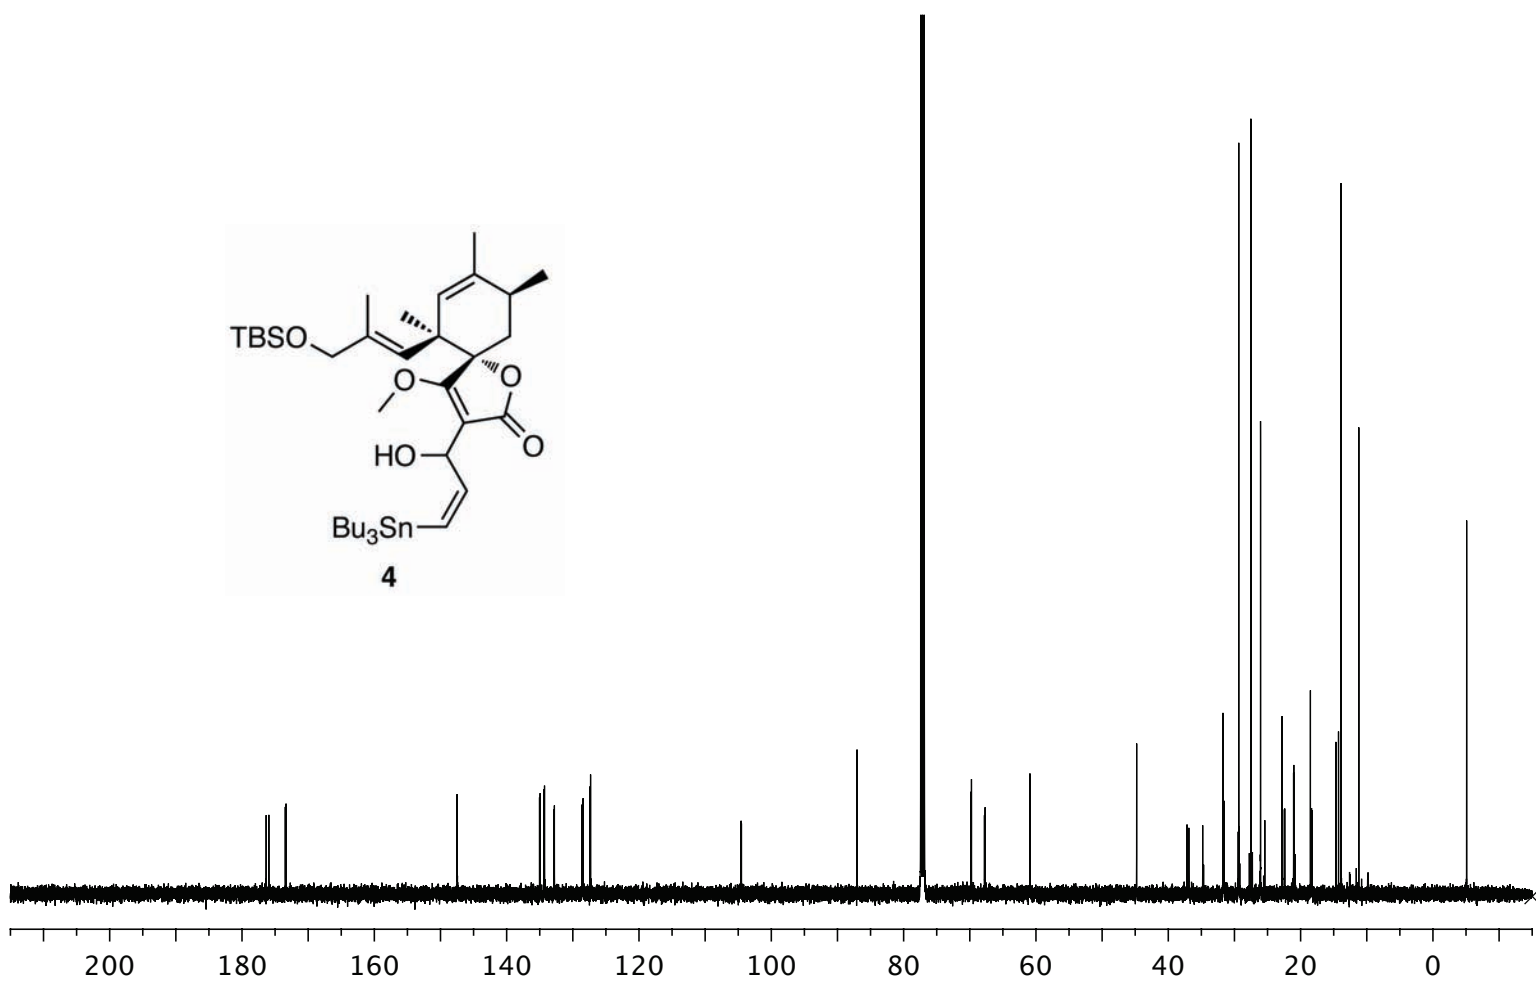

$^1\text{H-NMR}$  (400 MHz) and  $^{13}\text{C-NMR}$  (100 MHz) spectra of Stille adducts **3** in  $\text{CDCl}_3$

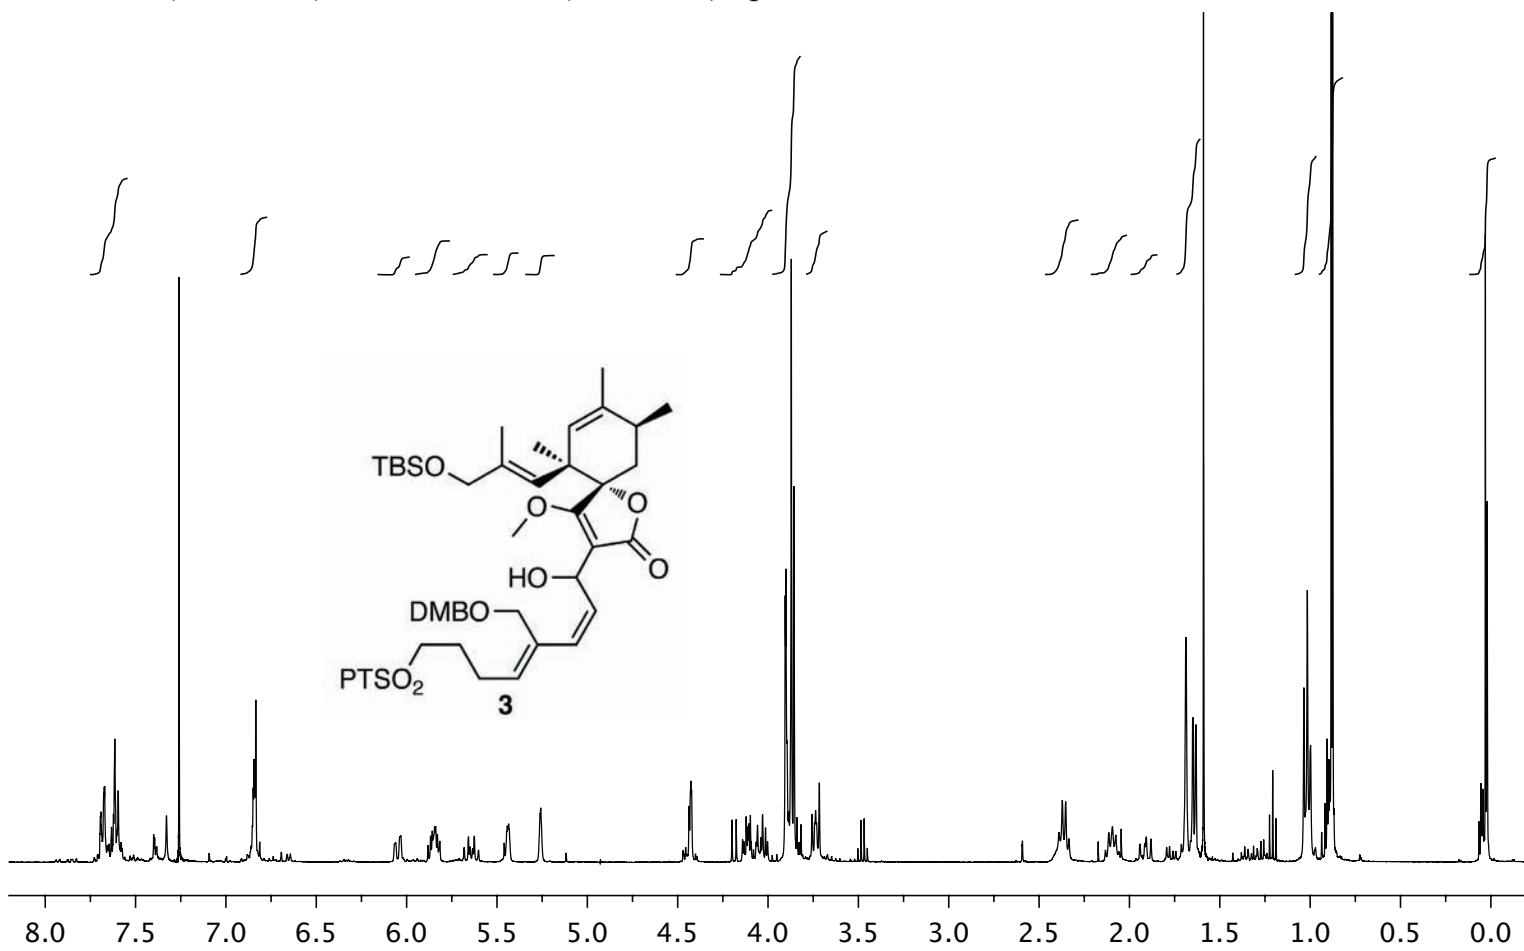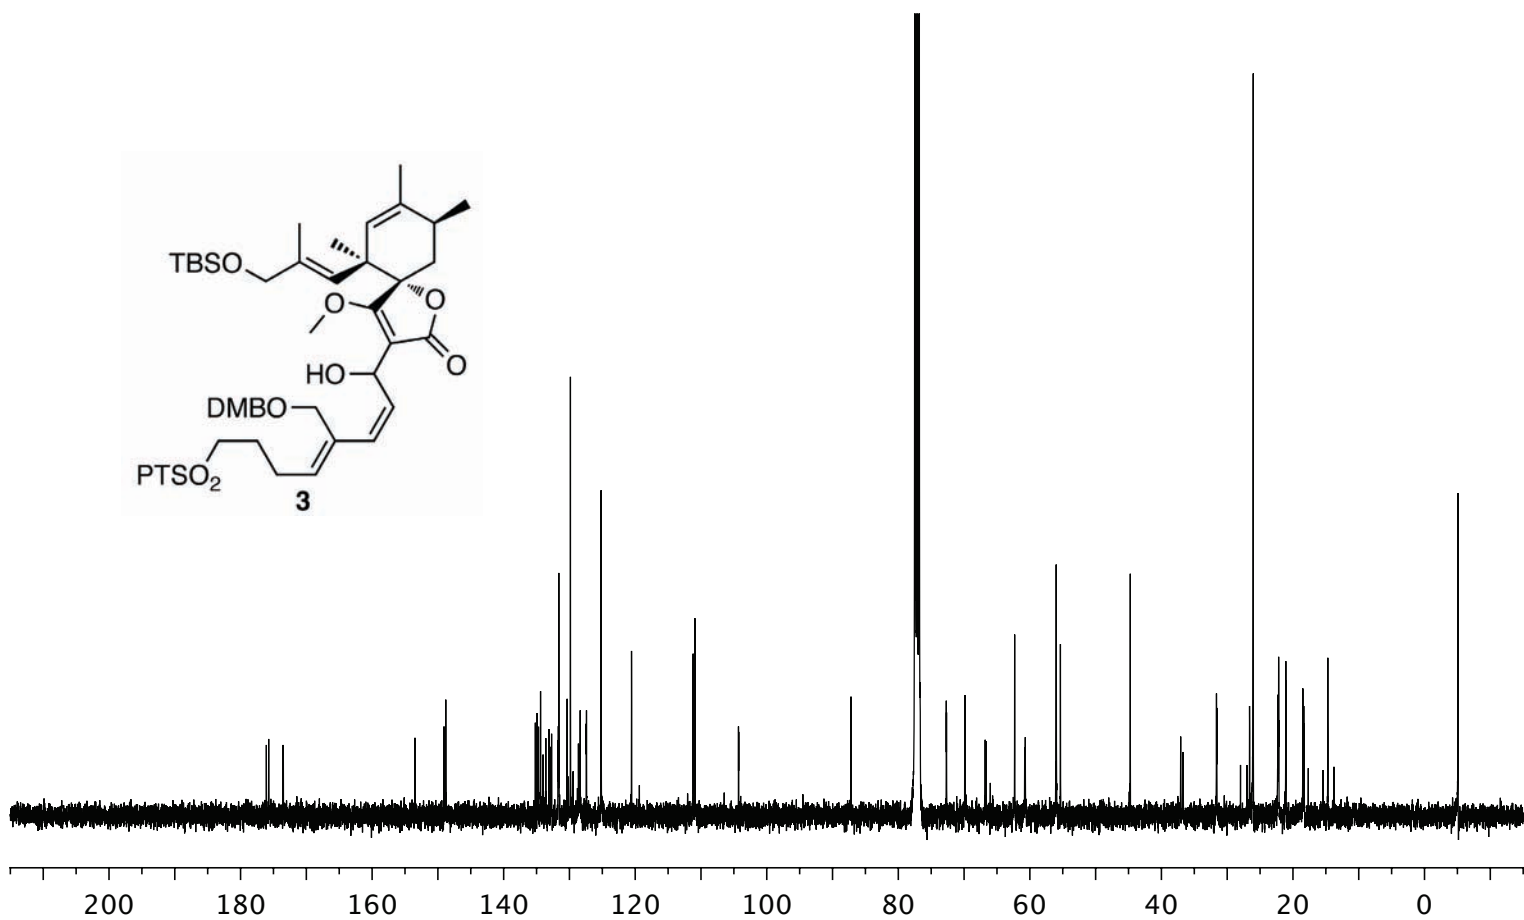

$^1\text{H-NMR}$  (500 MHz) and  $^{13}\text{C-NMR}$  (125 MHz) spectra of bis-silyl ethers **28** in  $\text{CDCl}_3$

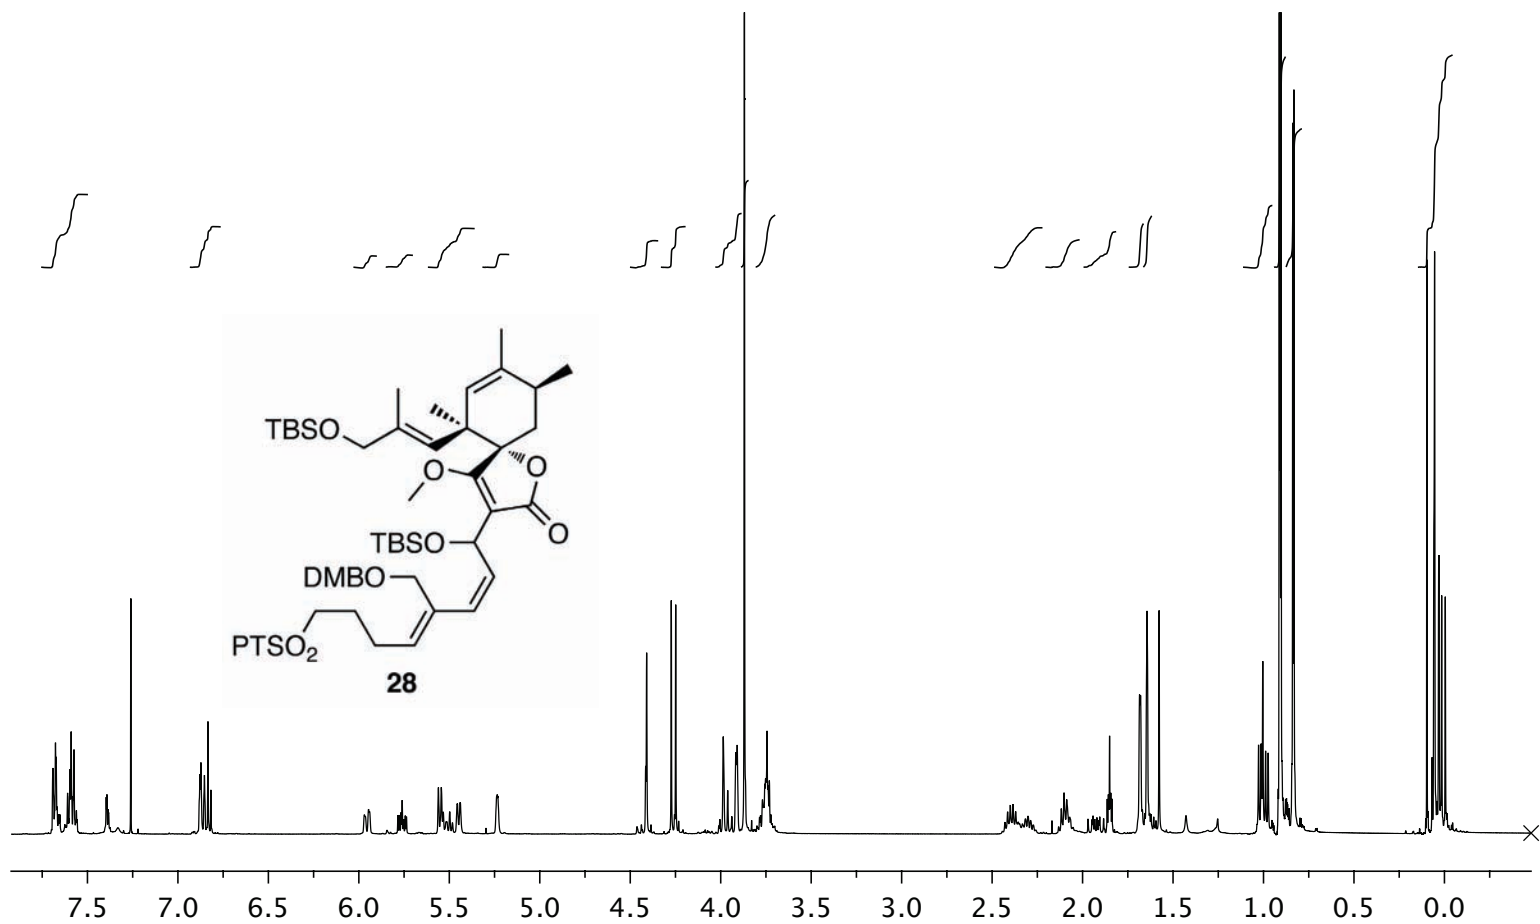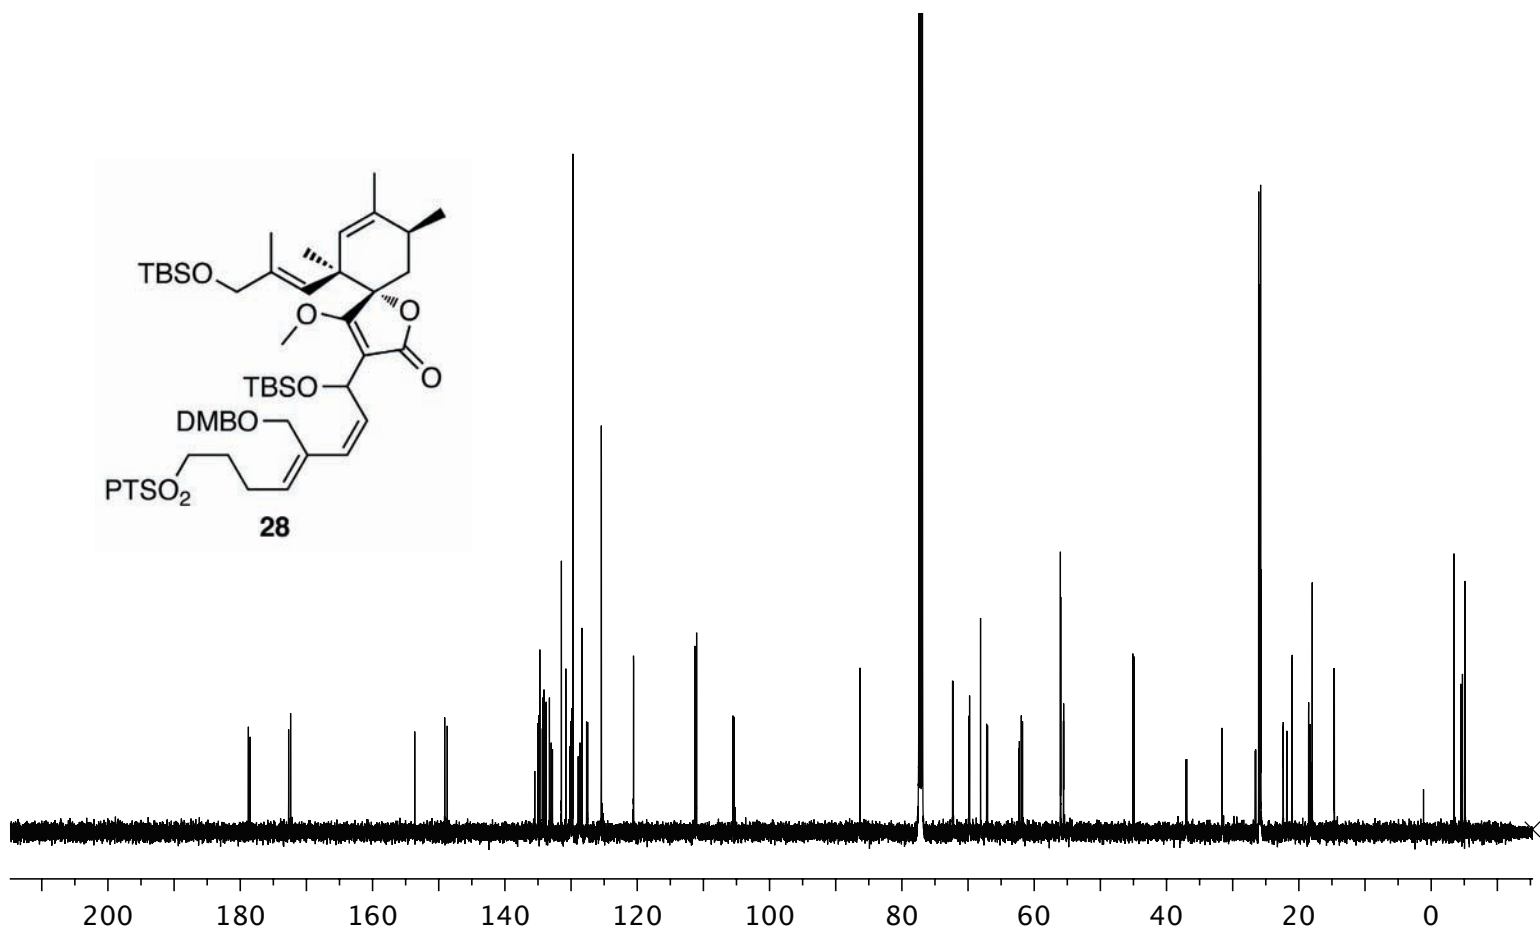



$^1\text{H-NMR}$  (500 MHz) and  $^{13}\text{C-NMR}$  (125 MHz) spectra of aldehydes **18** in  $\text{CDCl}_3$

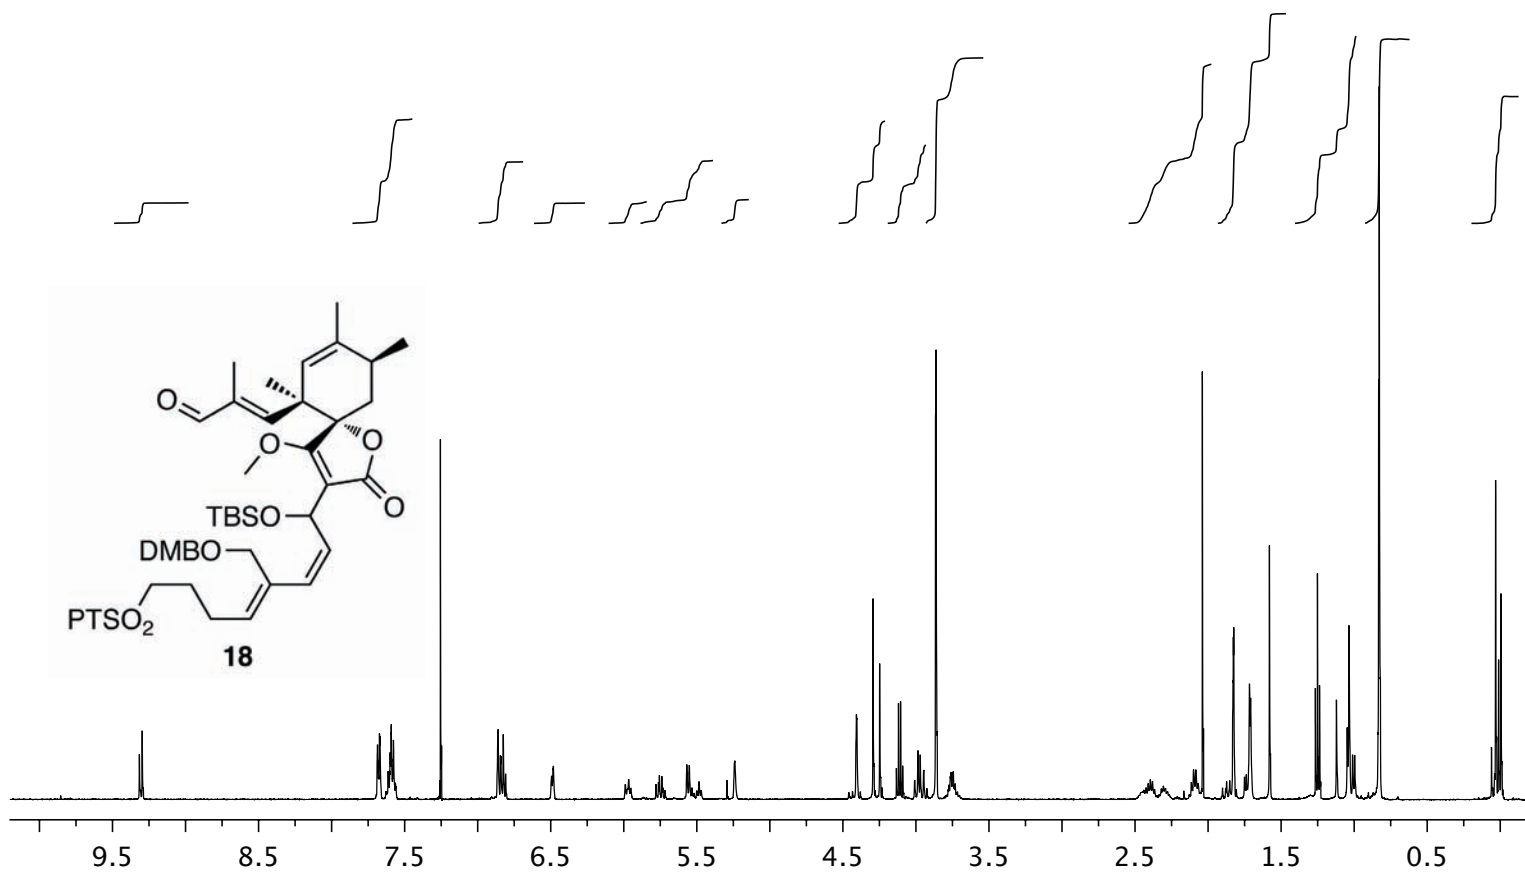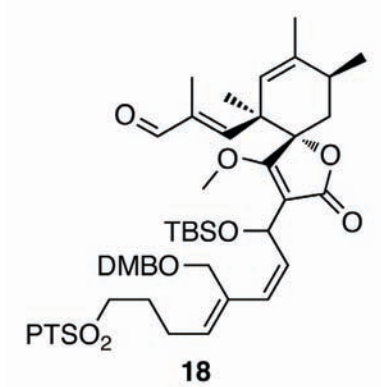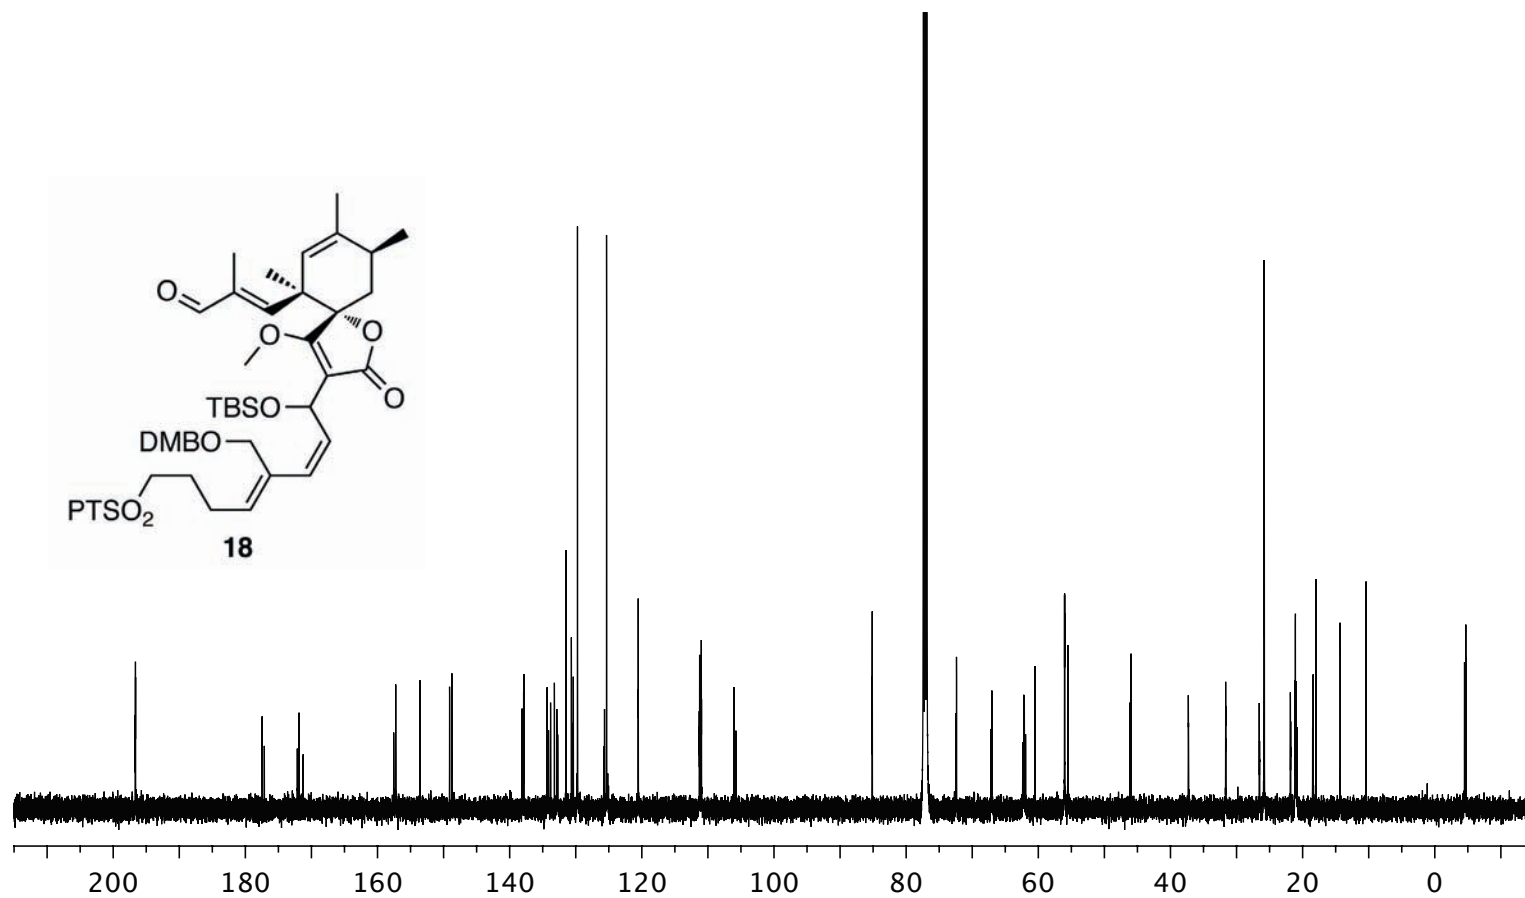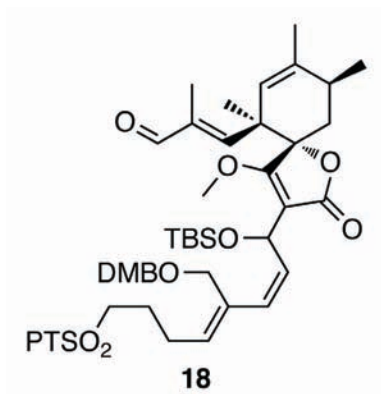

$^1\text{H-NMR}$  (500 MHz) and  $^{13}\text{C-NMR}$  (100 MHz) spectra of macrocycle **2** in  $\text{CDCl}_3$

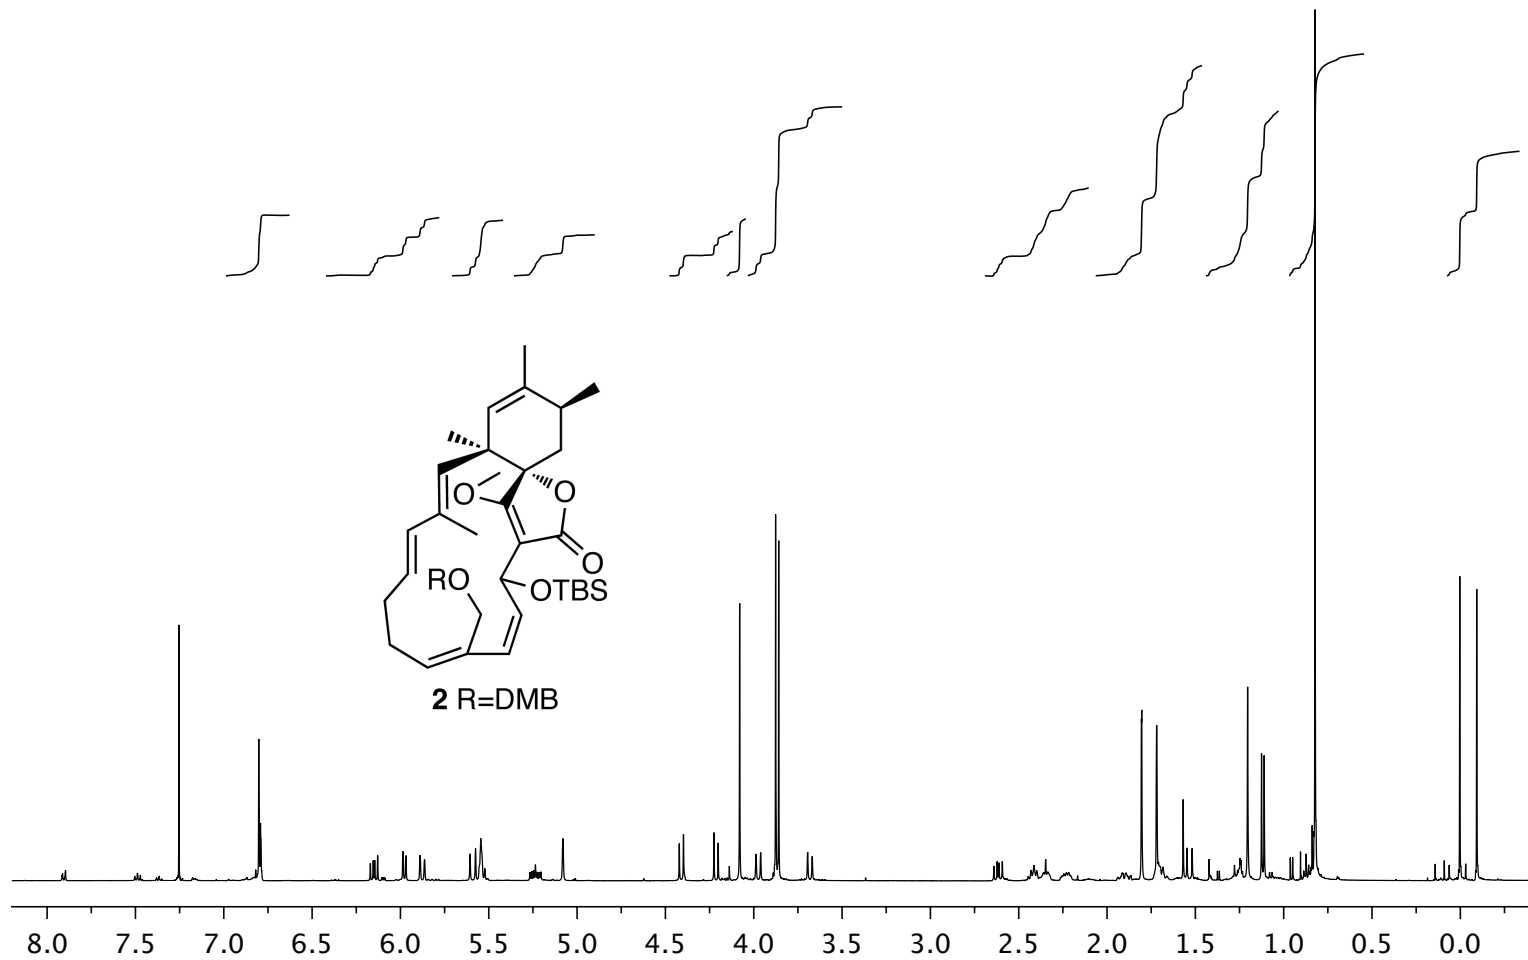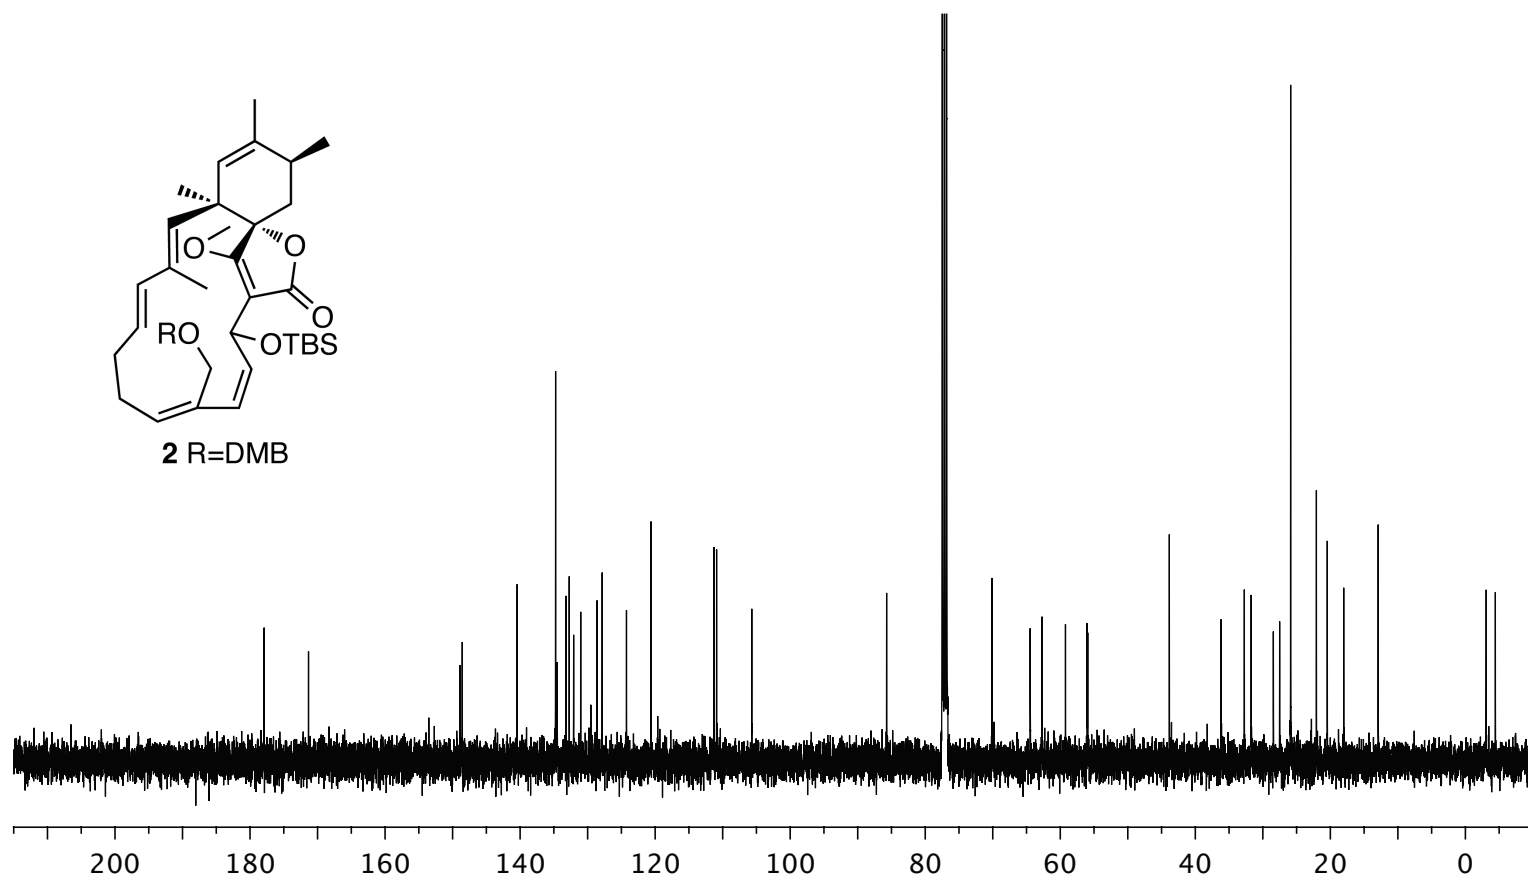



gCOSY (500 MHz) spectra of macrocycle **2** in CDCl<sub>3</sub>

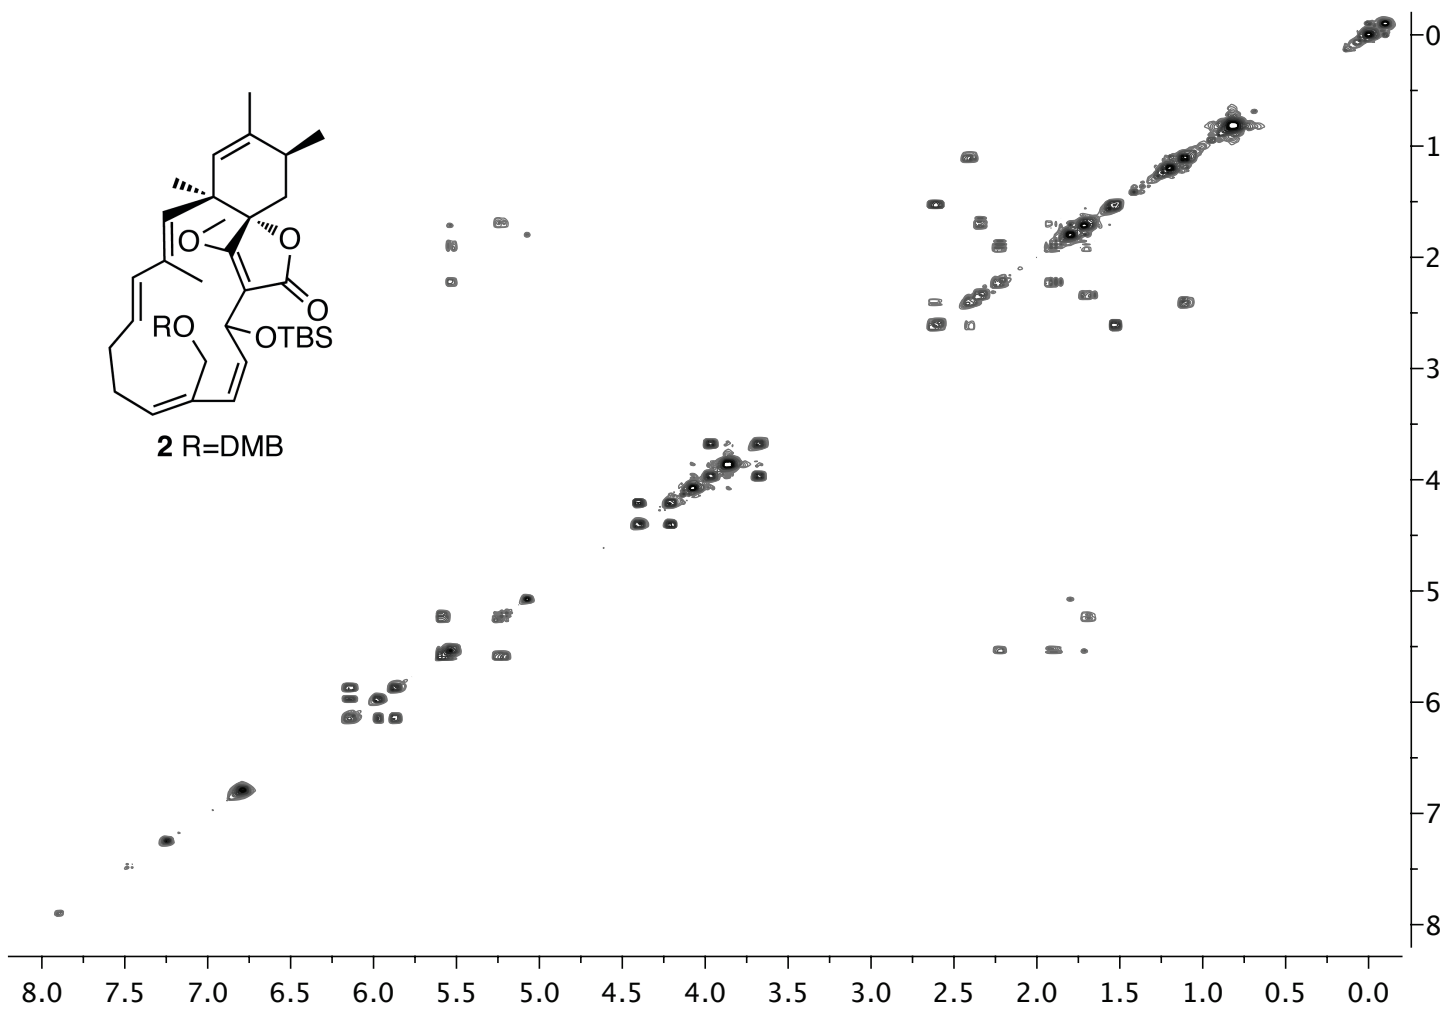

$^1\text{H-NMR}$  (400 MHz) and  $^{13}\text{C-NMR}$  (100 MHz) spectra of macrocyclic alcohol **19** in  $\text{CDCl}_3$

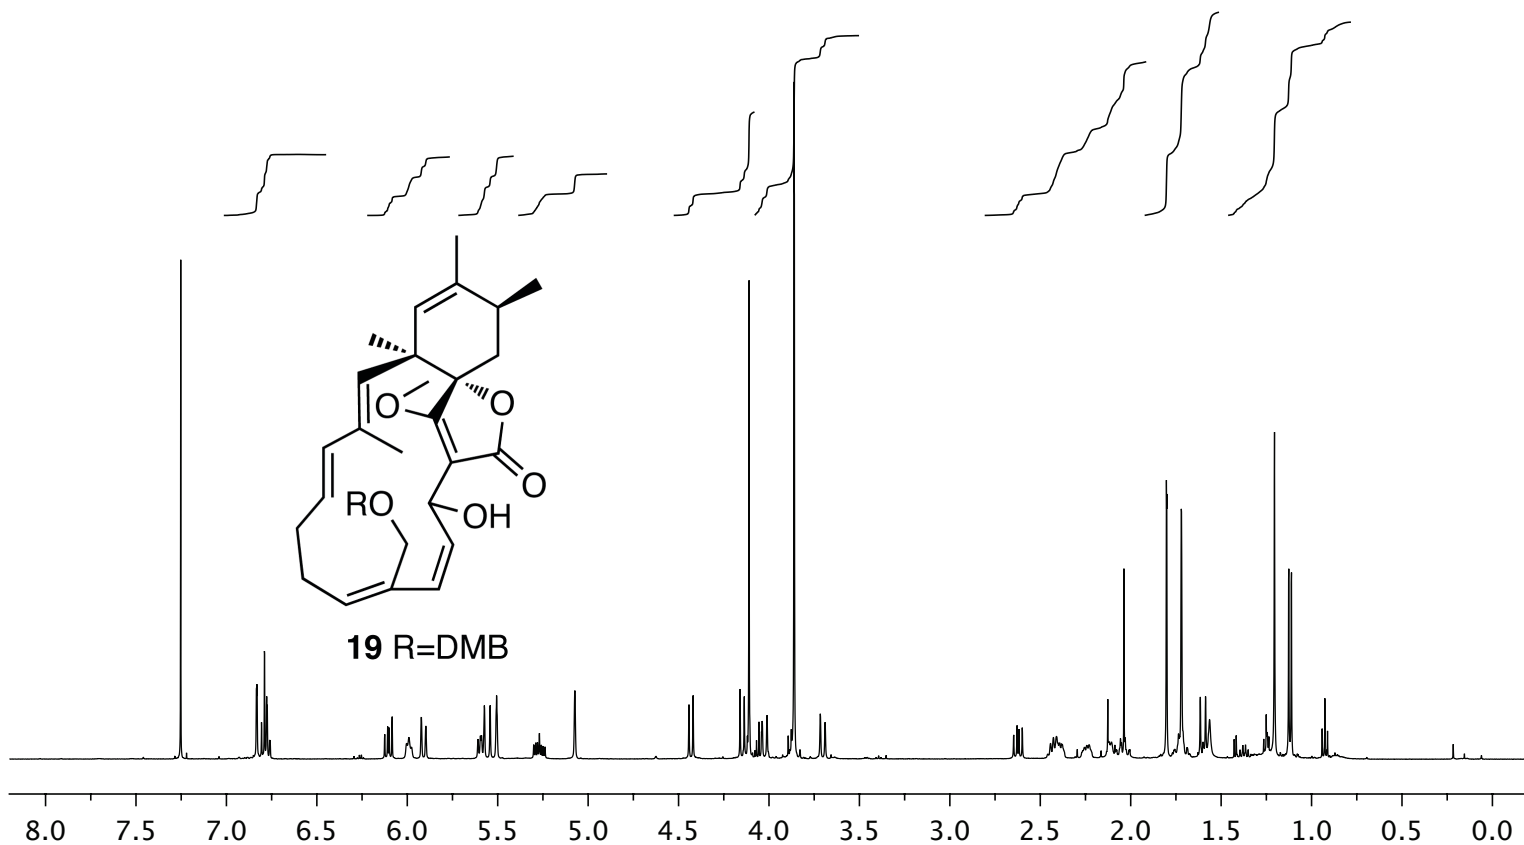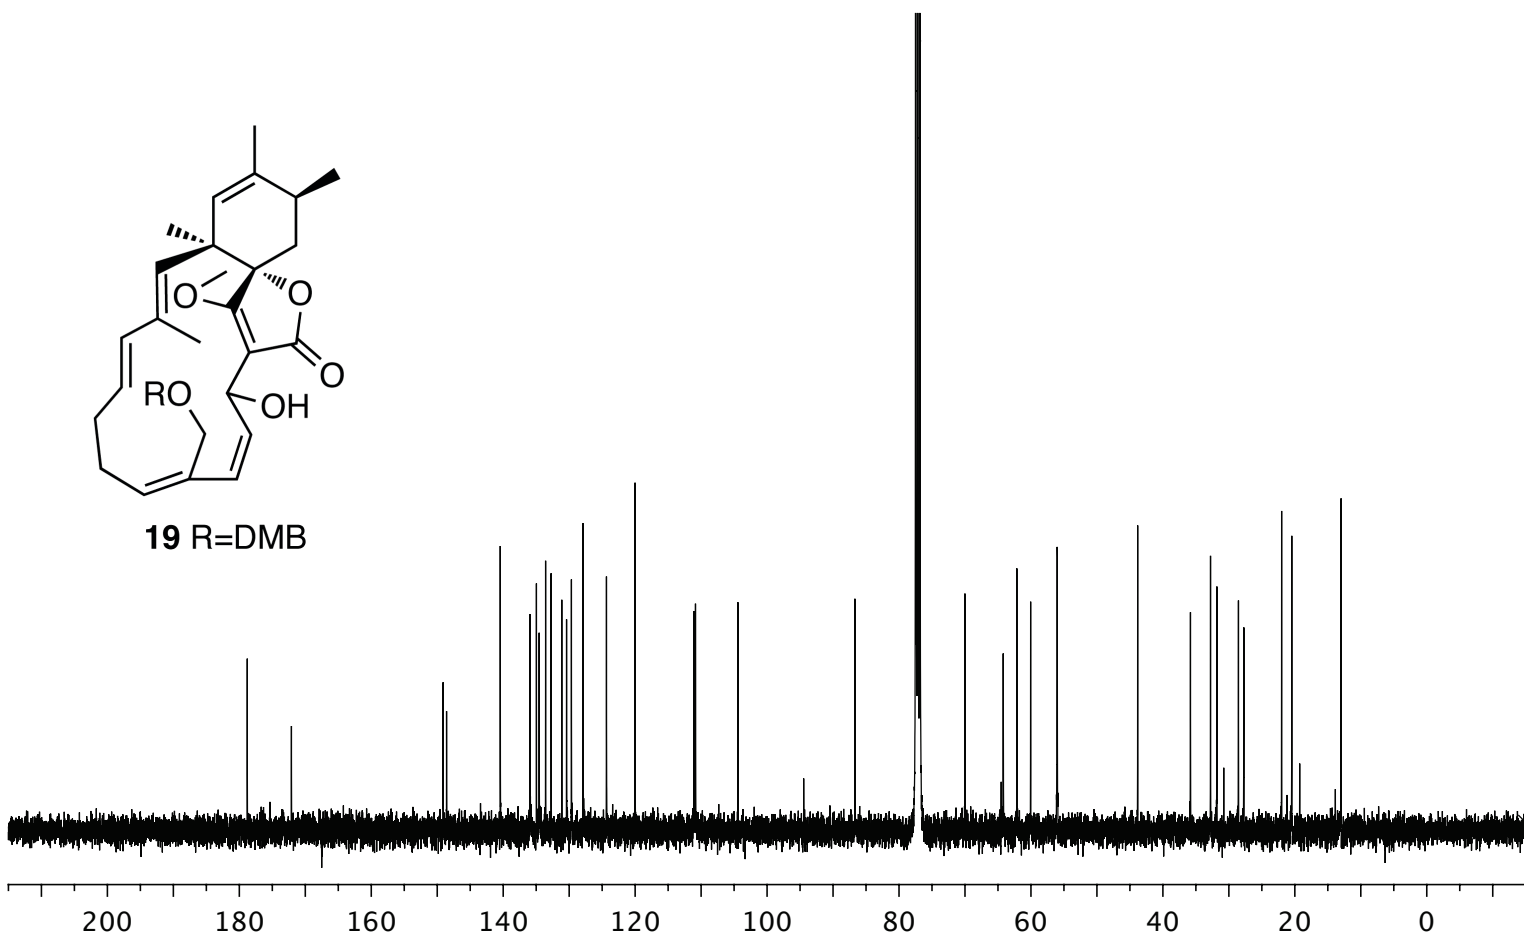

gHSQC (top) and gHMBC (bottom) spectra of macrocyclic alcohol **19** in CDCl<sub>3</sub>

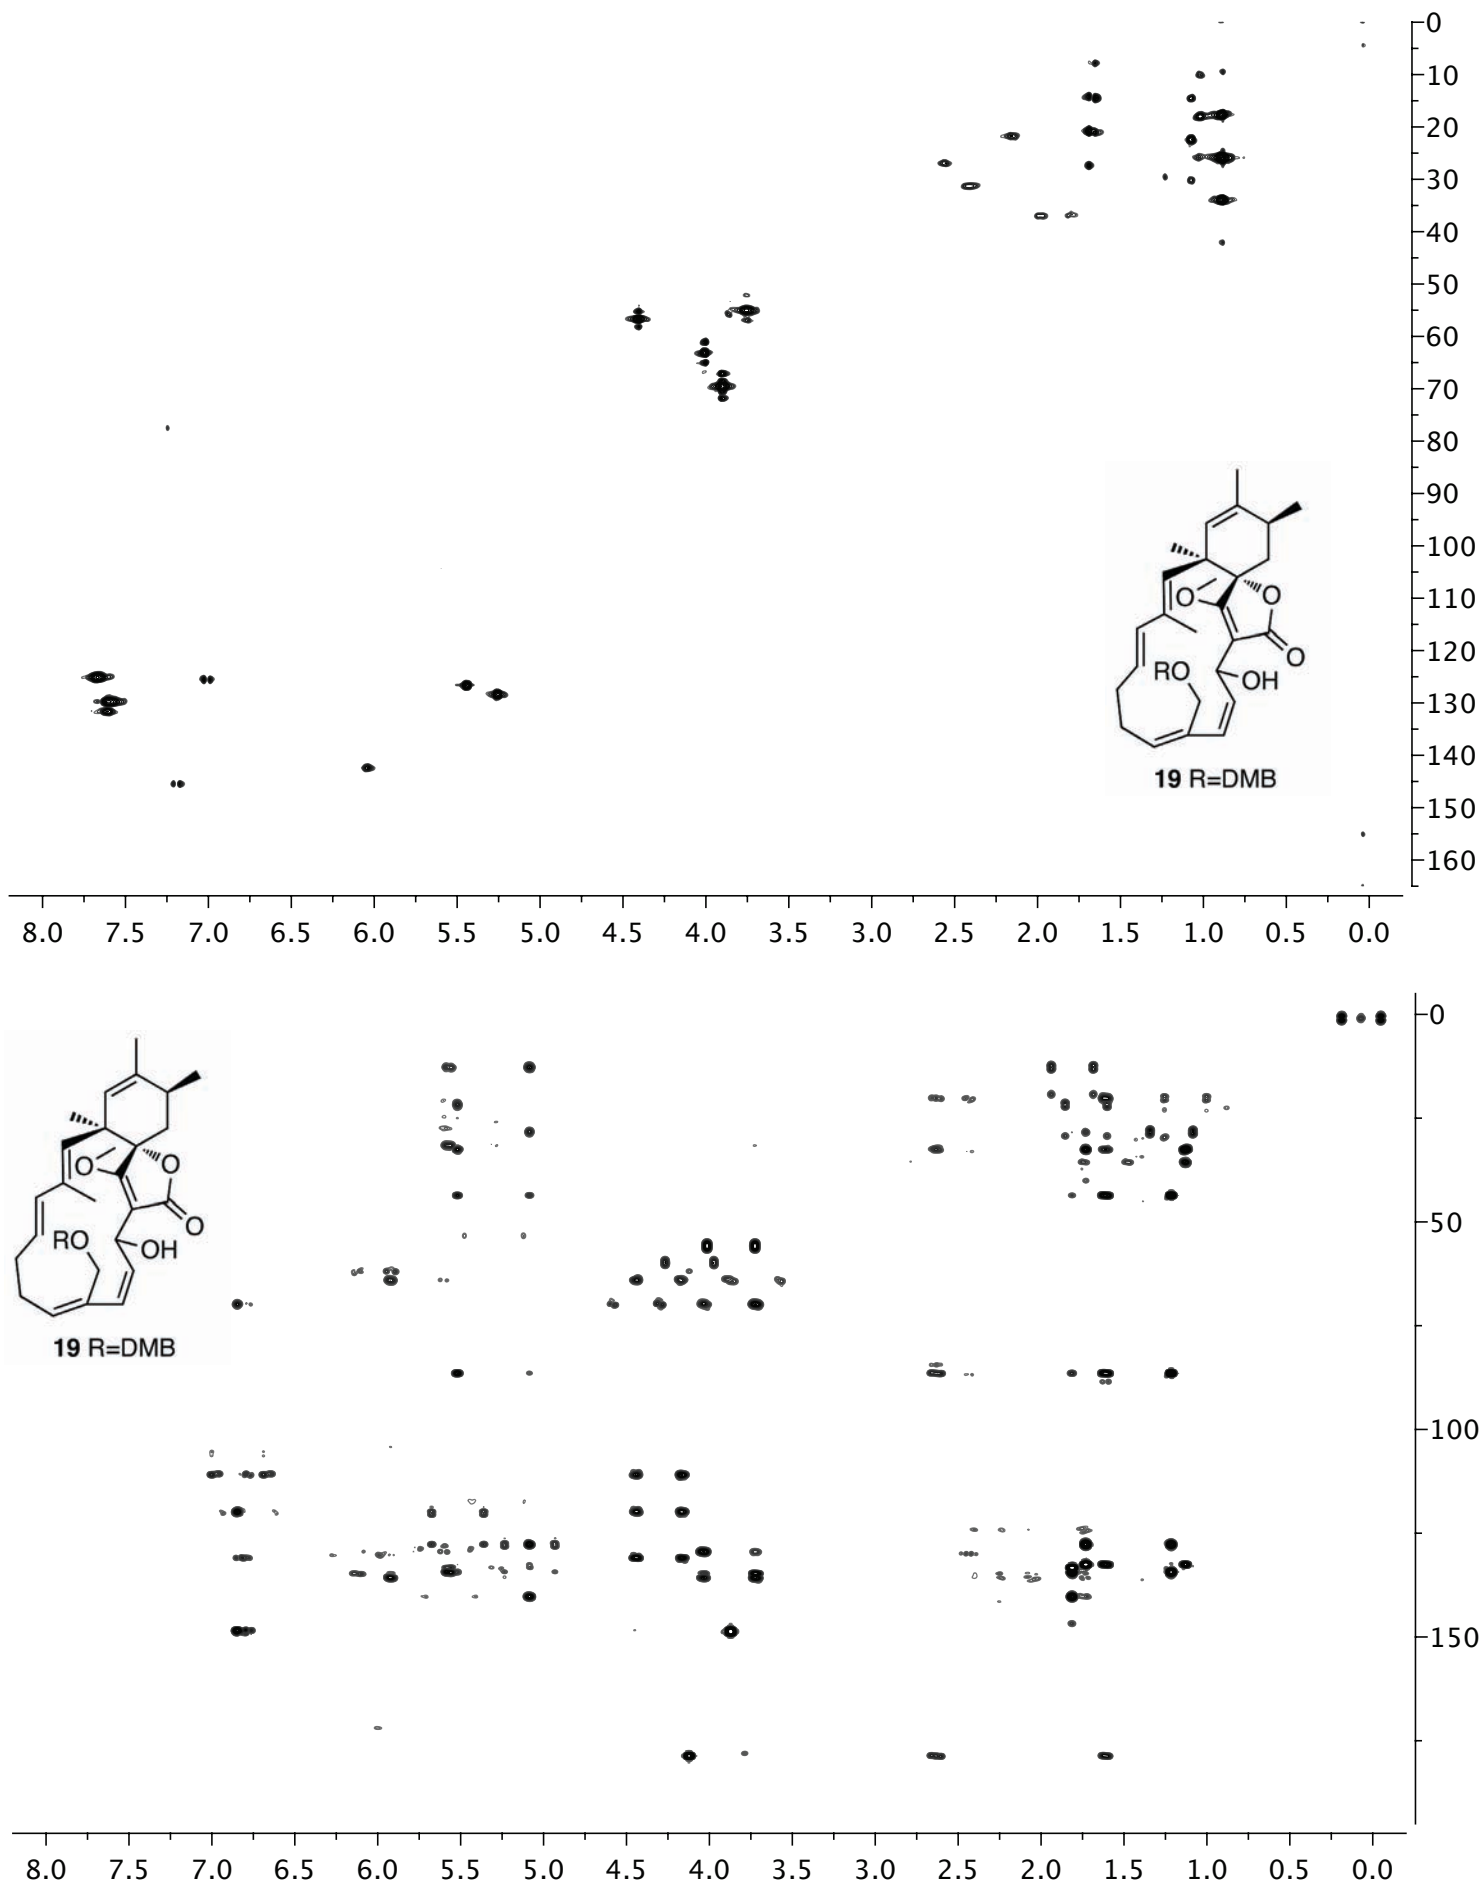

gCOSY (500 MHz) spectra of macrocyclic alcohol **19** in CDCl<sub>3</sub>

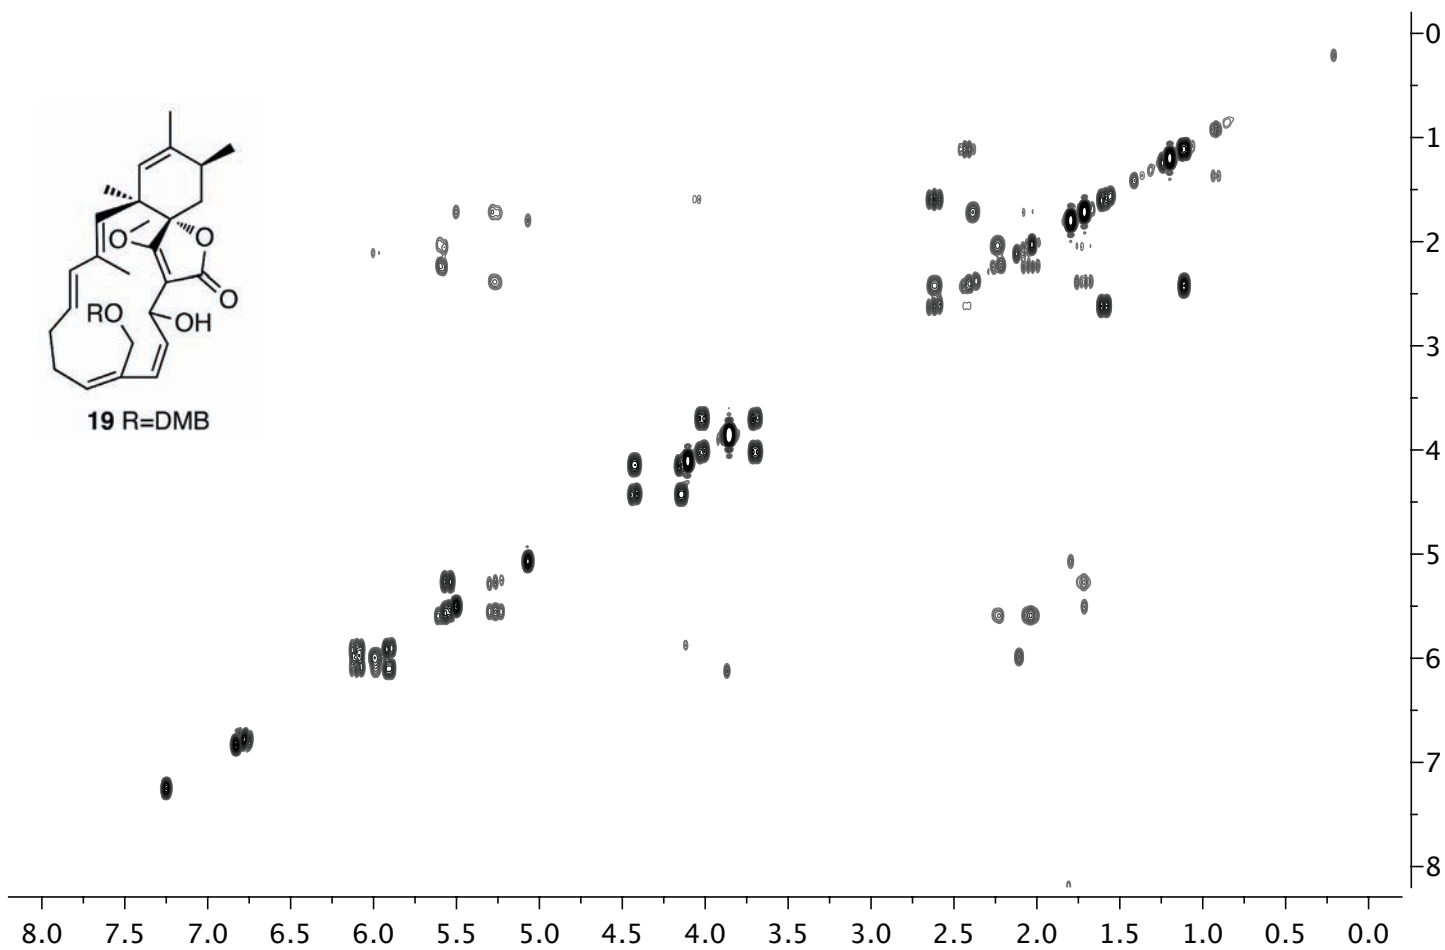

$^1\text{H-NMR}$  (500 MHz) and  $^{13}\text{C-NMR}$  (125 MHz) spectra of ketone **22** in  $\text{CDCl}_3$

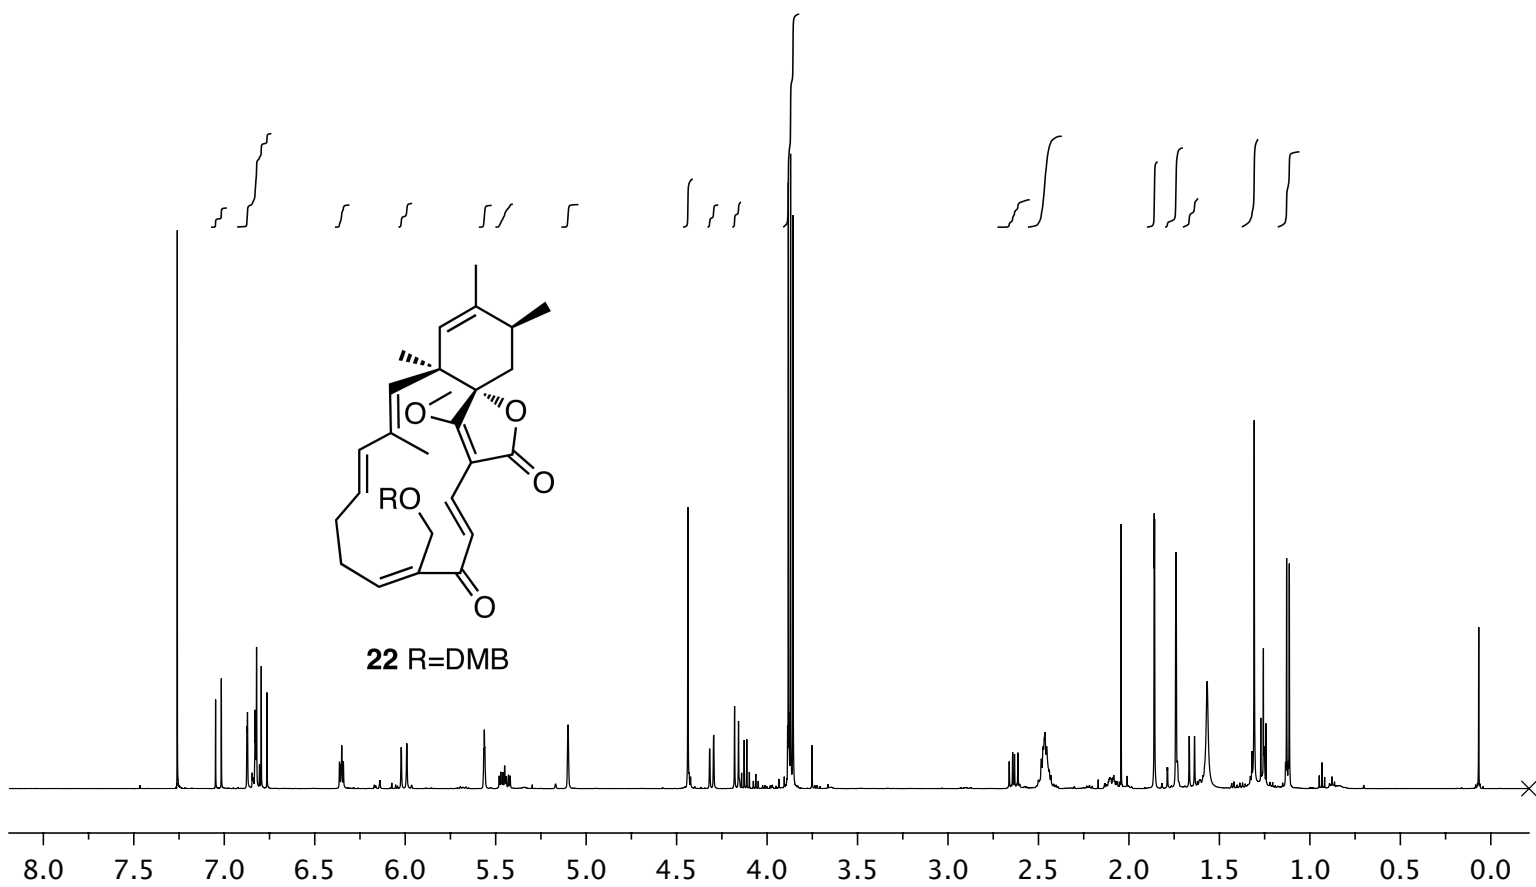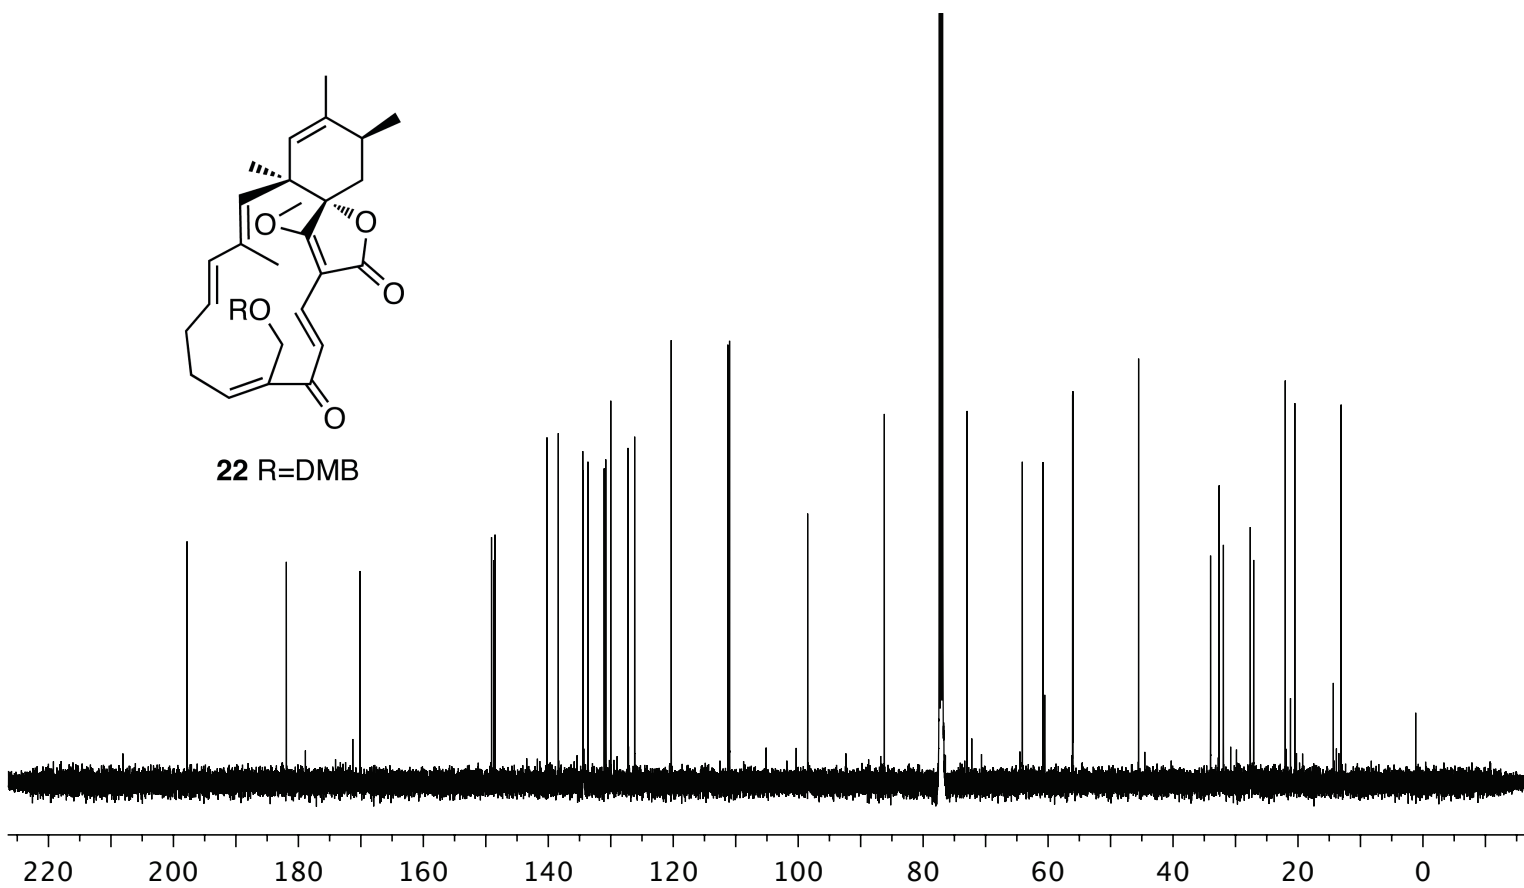

$^1\text{H-NMR}$  (500 MHz) and  $^{13}\text{C-NMR}$  (125 MHz) spectra of alcohol **23** in  $\text{CDCl}_3$

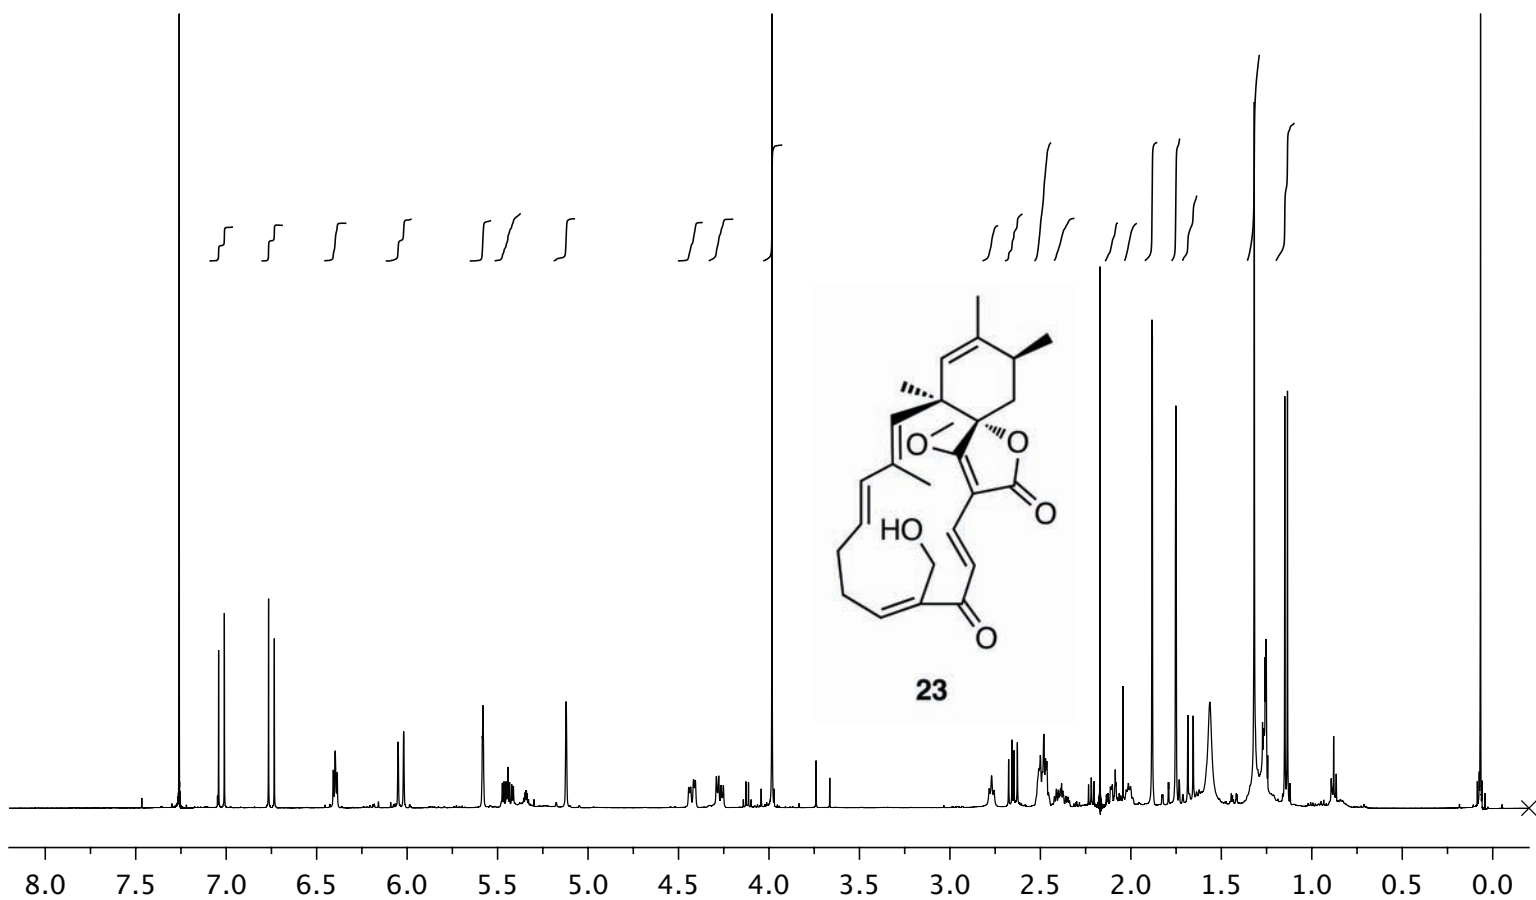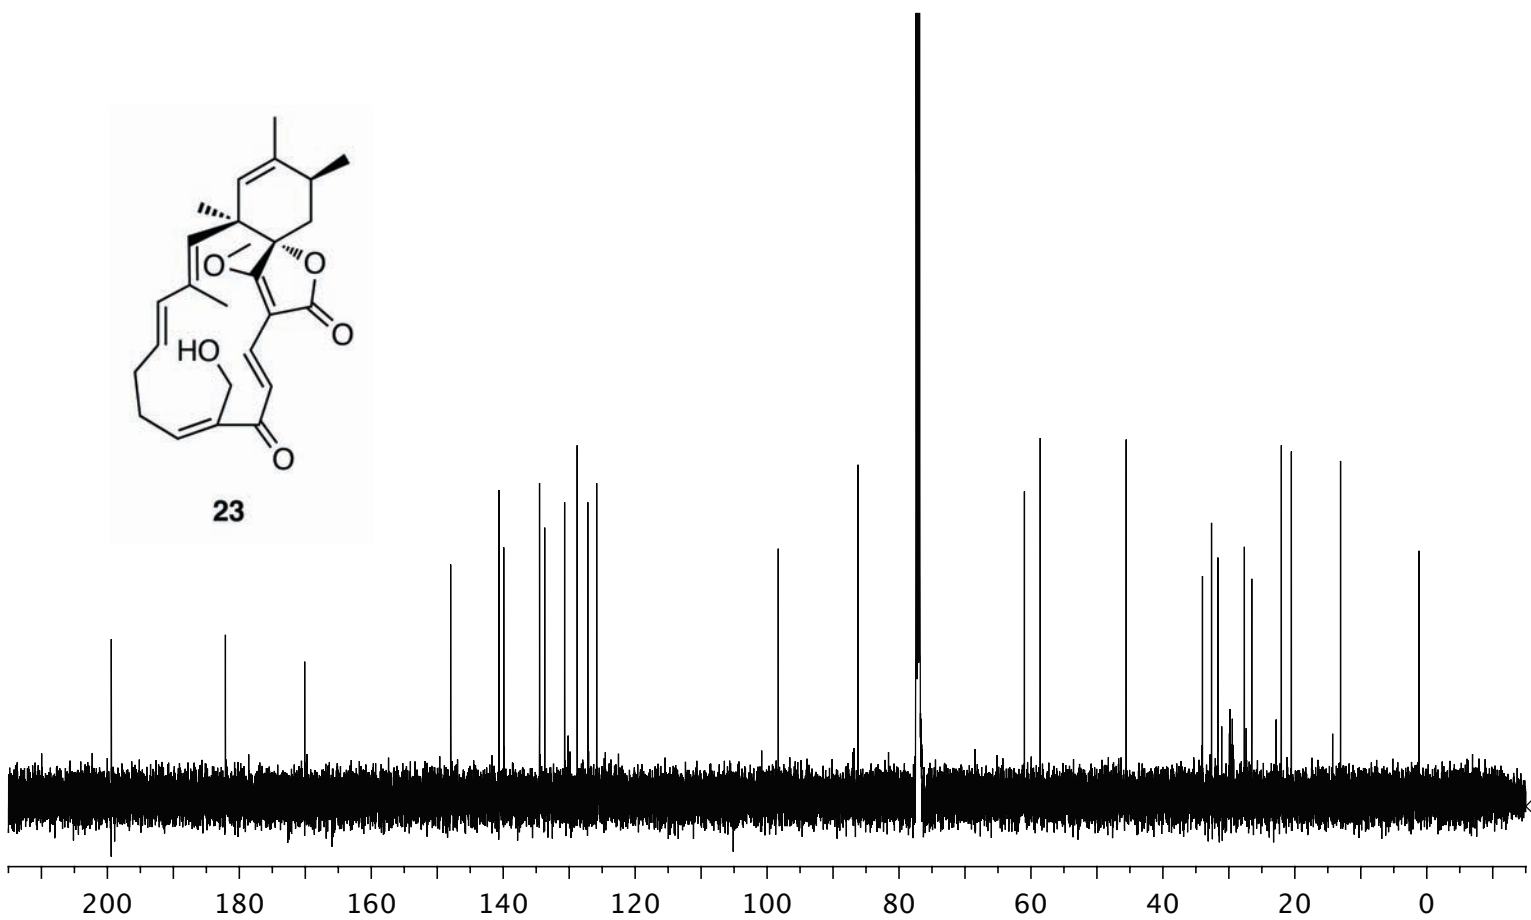

$^1\text{H-NMR}$  (400 MHz) and  $^{13}\text{C-NMR}$  (100 MHz) spectra of model bis-allylic alcohol **32** in  $\text{CDCl}_3$

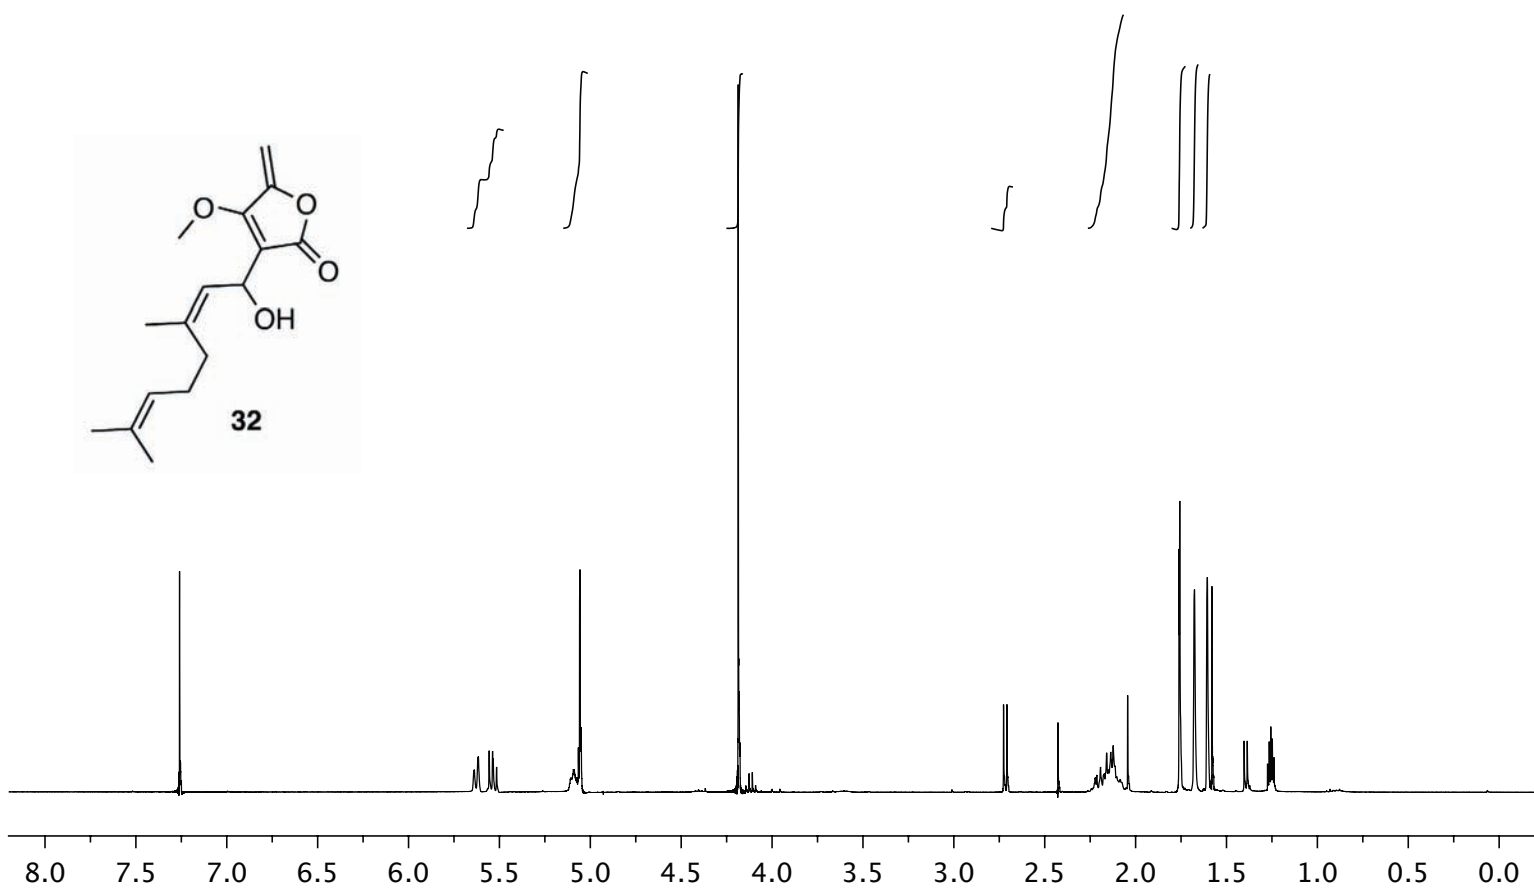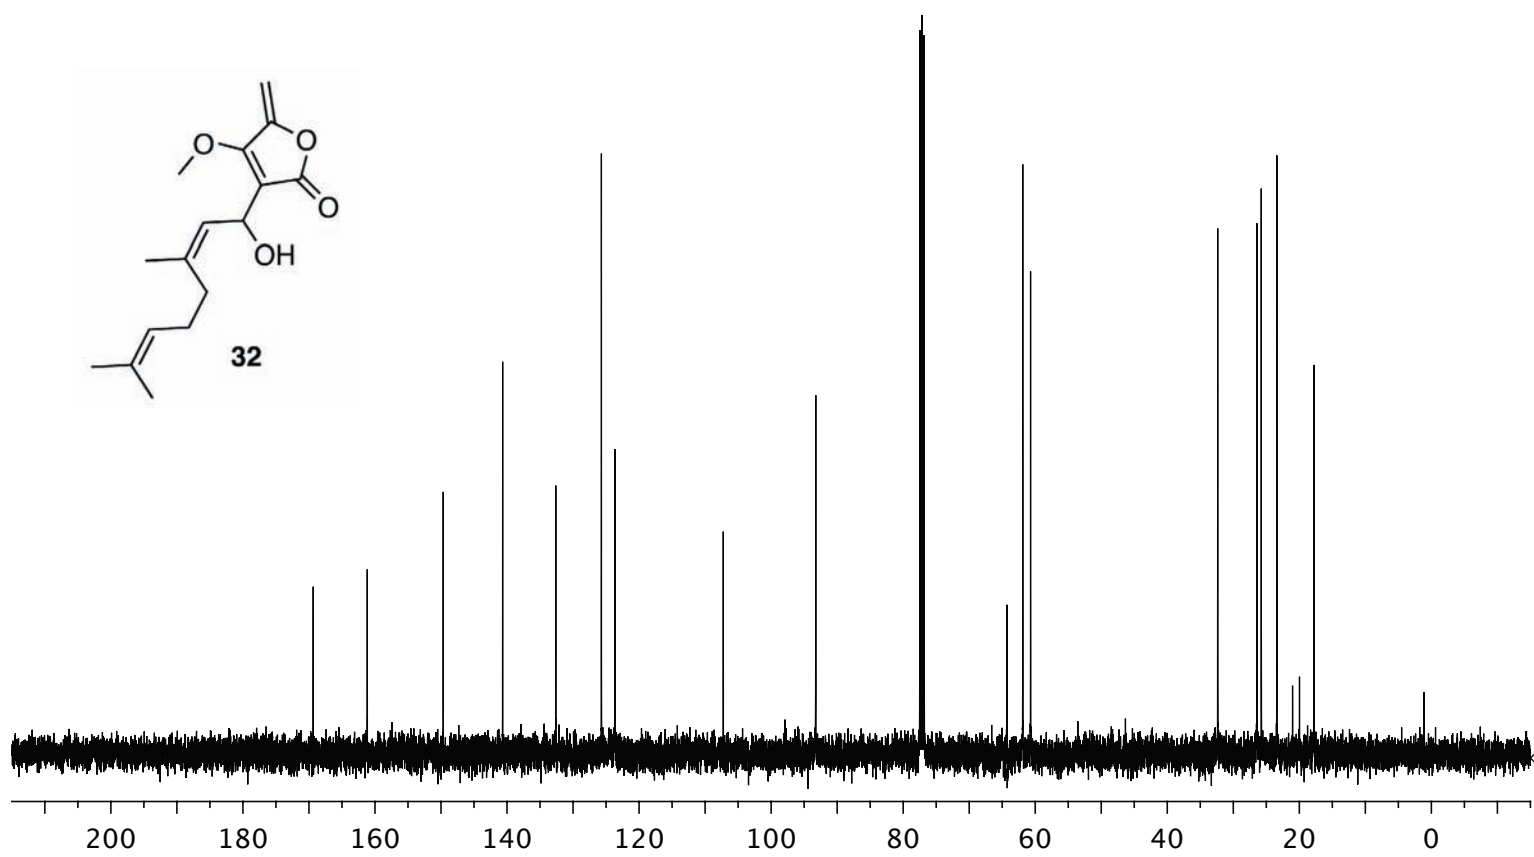

$^1\text{H-NMR}$  (400 MHz) and  $^{13}\text{C-NMR}$  (100 MHz) spectra of tertiary alcohol **33** in  $\text{CDCl}_3$

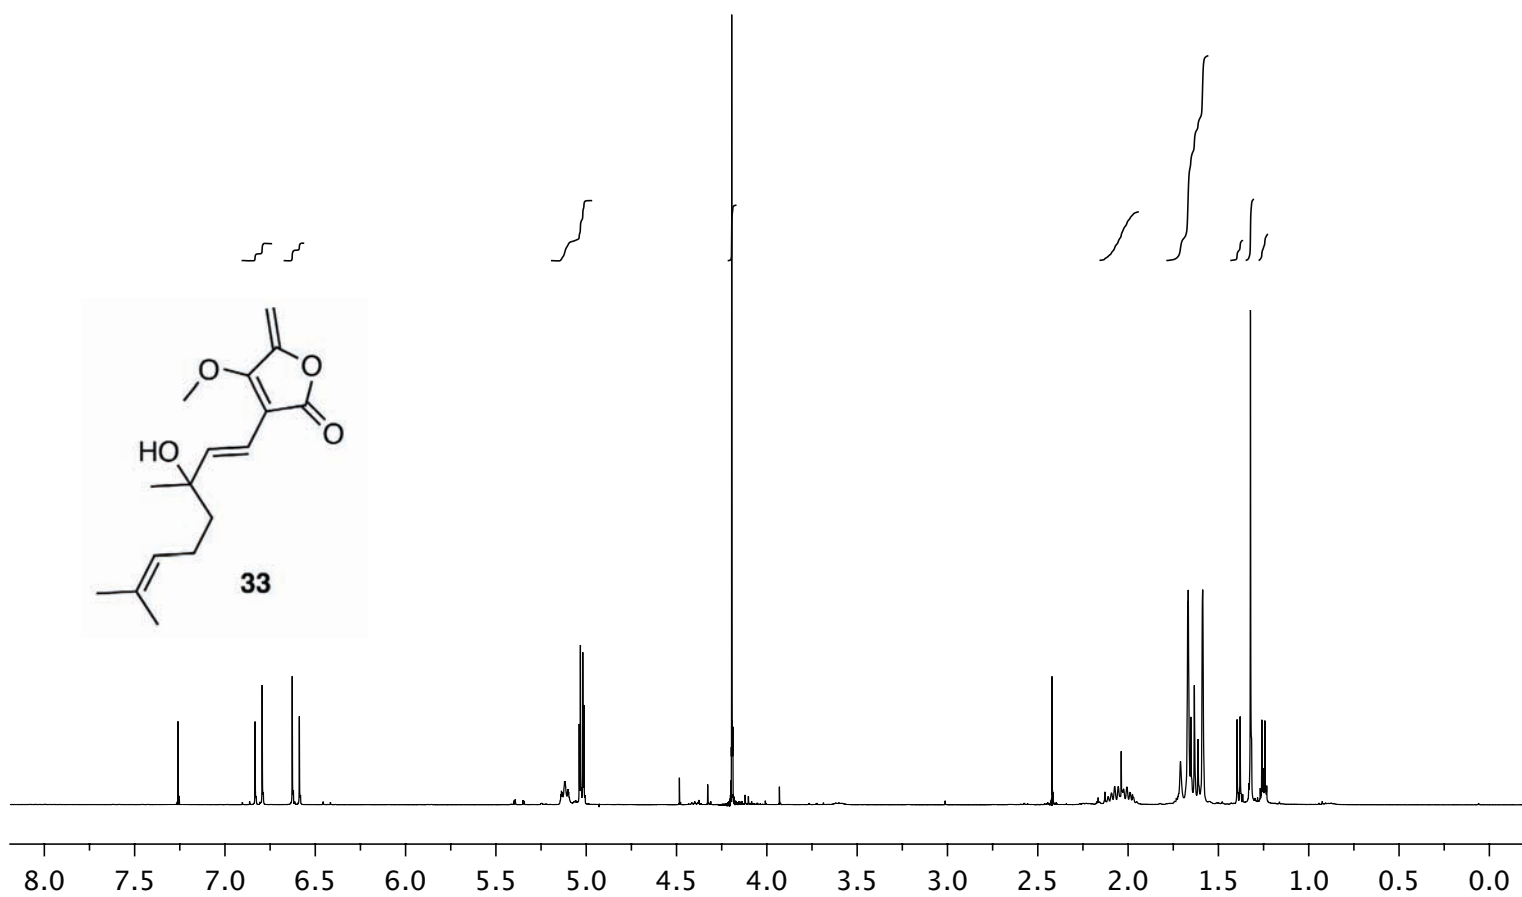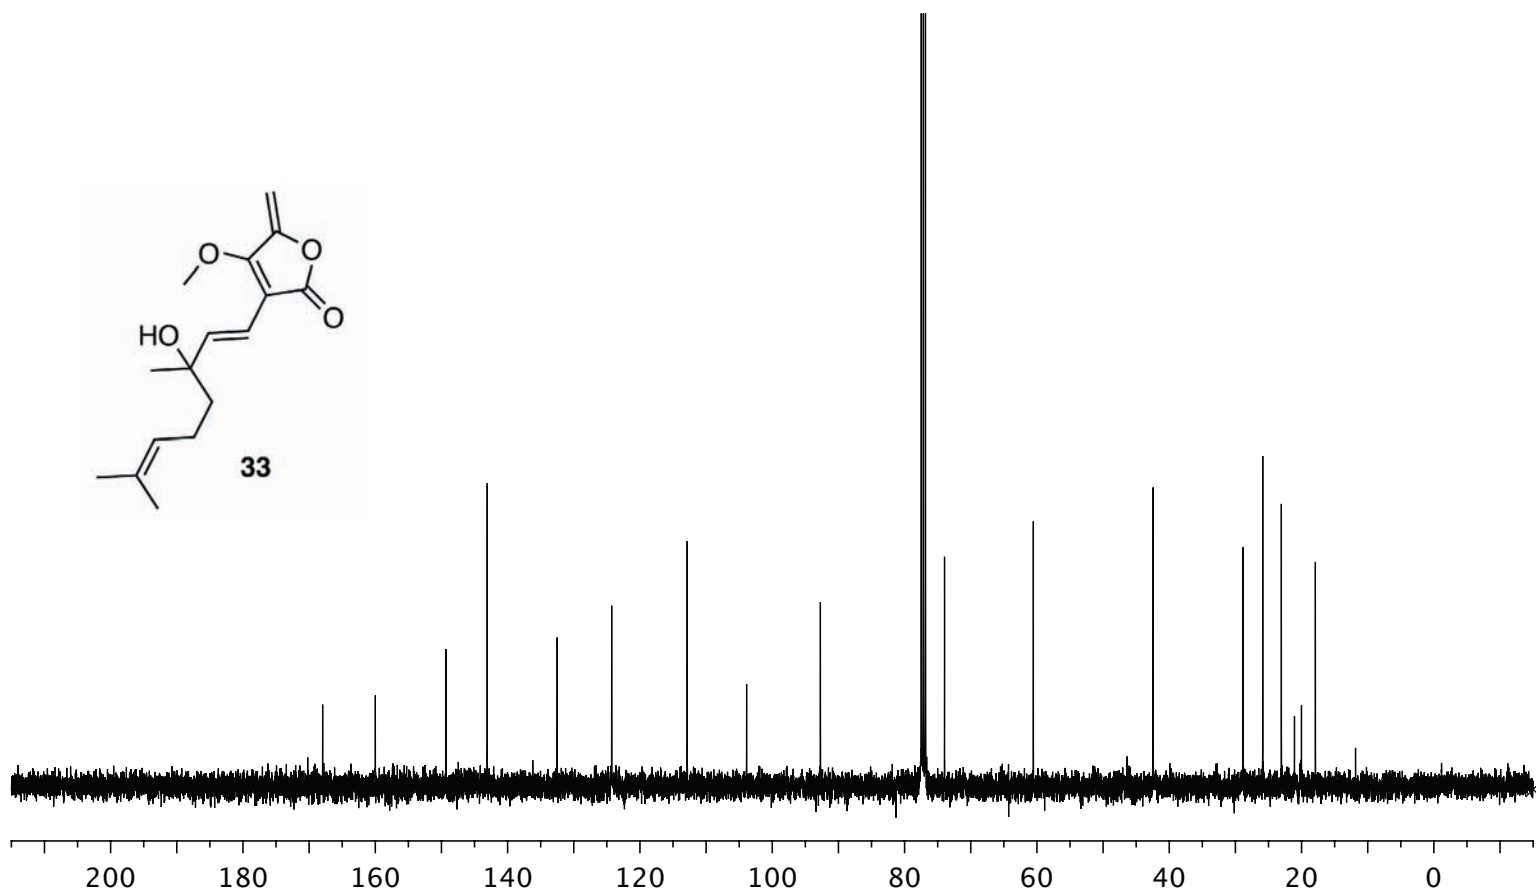



$^1\text{H-NMR}$  (400 MHz) and  $^{13}\text{C-NMR}$  (125 MHz) spectra of ketone **34** in  $\text{CDCl}_3$

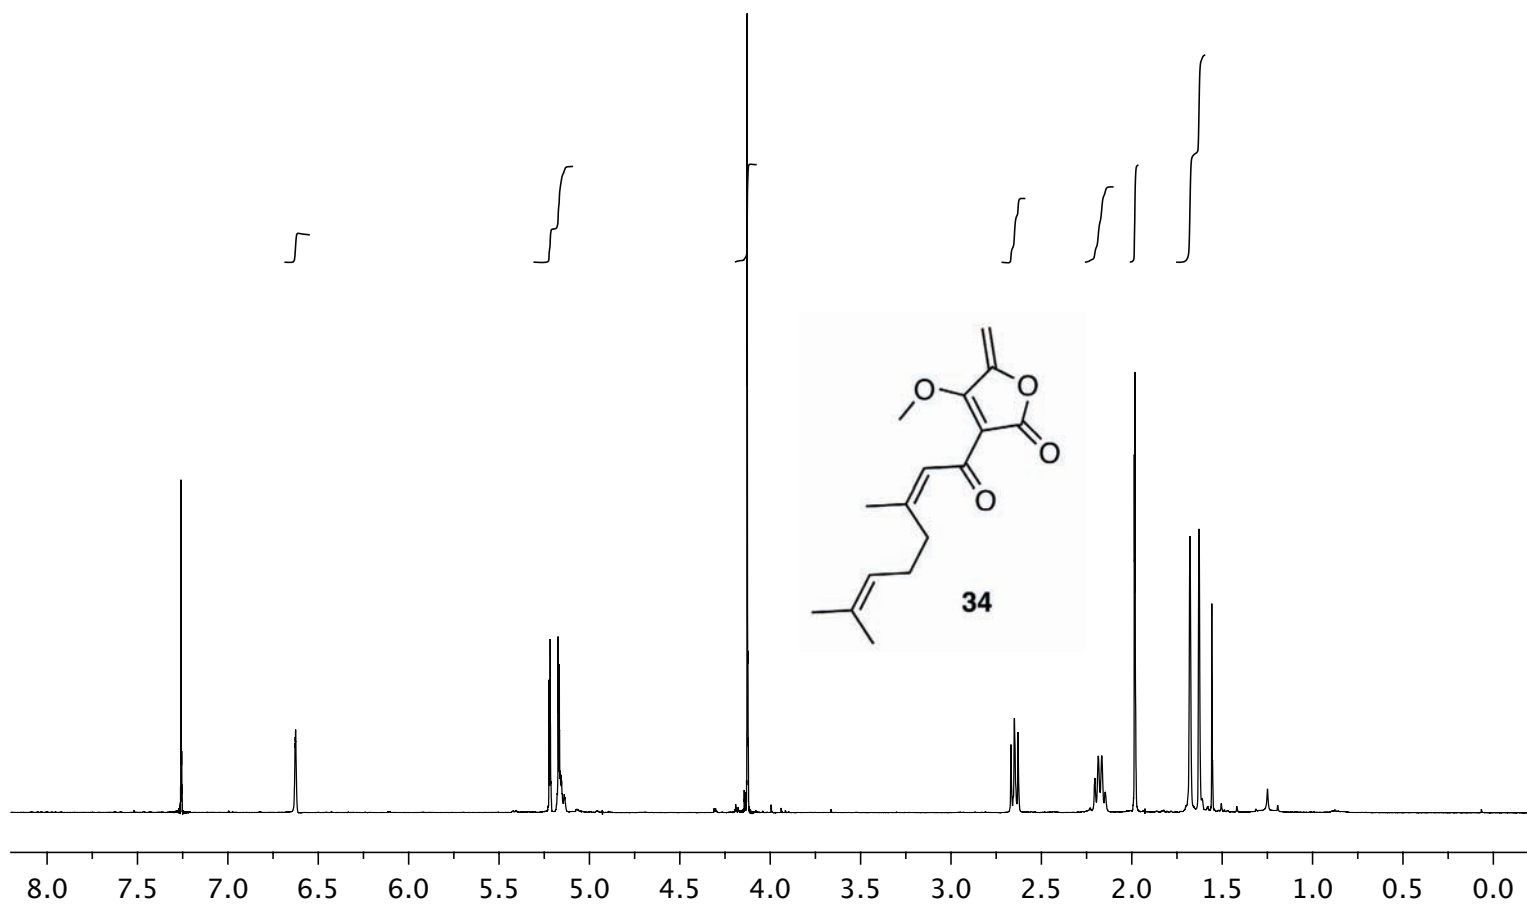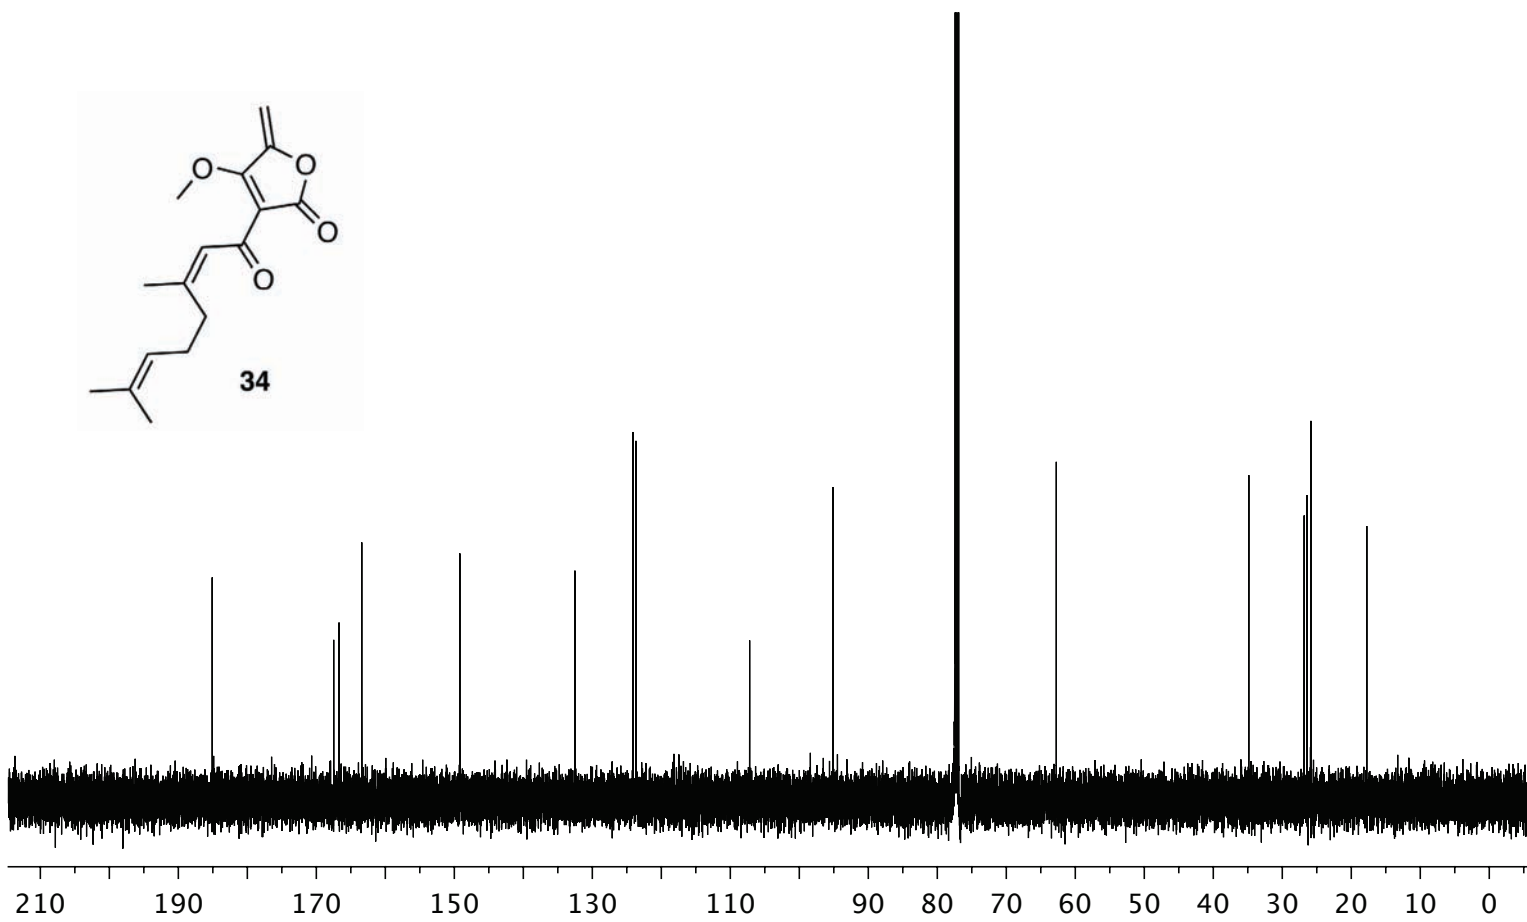

Supplement: NIHMS238322-supplement-2_si_002.pdf [file NIHMS238322-supplement-2_si_002.pdf]
